# Supplementary material for: Perennial vegetables: A neglected resource for biodiversity, carbon sequestration, and nutrition
Source: PLoS One. 2020 Jul 10;15(7):e0234611. doi: 10.1371/journal.pone.0234611 (PMC7351156; doi:10.1371/journal.pone.0234611)
Supplement: S1 Data — Tables of the ten vegetable species highest in each of the key nutrients for addressing traditional malnutrition and industrial diet deficiencies. (XLSX) [file pone.0234611.s003.xlsx]

## Sheet: Summary and Ranking
Data Summary and Ranking Sheet
Genus	Species	Common Name	Life Cycle	Form	Subform	Aquatic	Part	Source	Water	Fiber	Calcium	Iron mg/100g	Magnesium	Zinc	Vitamin A	Folate (B9)	Ascorbic Acid (C) mg/100g	Tocopherol/Tocotrienol (E)
									%	%	mg/100g	mg/100g	mg/100g	mg/100g	RAE mg/100gm	micrograms (ug)/100gm	mg/100g	mg/100gm
									XH	7.16+	477.41+	4.22+	171.01+	1.13+	1.12+	388.01+	233.60+	5.09+
									VH	3.59-7.15	238.71-477.40	2.12-4.21	85.51-171.00	0.57-1.12	0.56-1.11	194.01-388.00	116.81-233.59	2.55-5.08
									H	2.51-3.58	161.58-238.70	1.56-2.11	60.27-85.50	0.43-0.56	0.38-0.55	132.64-194.00	79.02-116.80	1.43-2.54
									M	4.16-2.50	86.72-161.57	1.02-1.55	35.76-60.26	0.30-0.42	0.19-0.37	73.08-132.63	42.34-79.01	0.74-1.42
									L	0.40-1.45	11.85-86.71	0.47-1.01	11.25-35.75	0.16-0.29	0-0.18	13.50-73.07	5.65-42.33	0.05-0.73
									VL	0-0.39	0-11.84	0-0.46	0-11.24	0-0.15	0-0	0-13.49	0-5.64	0-0.04
Amaranthus	retroflexus	amaranth	annual	herb	forb		leaf			1.09	630	3.14		1.05		67	63	2.5
Amaranthus	dubious	amaranth	annual	herb	forb		leaf			1.29333	380	2.84		2.90667		64	91.6667	4.105
Amaranthus	cruentus	amaranth	annual	herb	forb		leaf		84	1.58333	326.333	5.11667		1.795	0.2858	69.3333	60.3333	2.68
Amaranthus	tricolor	amaranth	annual	herb	forb		leaf			1	272.214	3.81		0.807143		188	66.8333	1.1
Amaranthus	hypochondriacus	amaranth	annual	herb	forb		leaf			1.58	260.2	2.3		3.548		68	88.8	1.87
Amaranthus	spp.	amaranth	annual	herb	forb		leaf		91.7		215	2.3	55	0.9	0.14585	85
Apium	graveolens	celery	annual	herb	forb		petiole		95.05	1.125	46	0.3	14	0.13	0.015825	36	5.55
Atriplex	hortensis	orach	annual	herb	forb		leaf			0.72	158	1.24		0.35	0.633499	172	44	3.11
Barbarea	verna	winter cress	annual	herb	forb		leaf		90	1	80	1			0.465		70
Beta	vulgaris	chard, beet greens	annual	herb	forb		leaf		90.9571	1.4125	102.75	2.95417	78.25	0.316667	0.242476	32.5714	27.2308	0.92875
Bidens	pilosa	bidens	annual	herb	forb		leaf		82	1.11	118	1.38			0.487106		52.5	1.74
Brassica	rapa	broccoli raab	annual	herb	forb		flowerbud		92.25	1.85	116.5	1.8	33.5	0.77	0.13305	83	45.1
Brassica	oleracea	broccoli	annual	herb	forb		flowerbud		89.65	1.26714	54.4429	1.04714	24	0.558333	0.0703213	71	94.1714	0.88
Brassica	oleracea	cauliflower	annual	herb	forb		flowerbud		91	1.355	26	0.85	18.3333	0.368571	0.00329865	57	85.6625	0.16345
Brassica	juncea	mustard greens	annual	herb	forb		leaf		91.15	0.896154	152.038	1.24231	30.5	0.230833	0.145533	31	65.6154	1.08083
Brassica	rapa	Chinese cabbage, pak choi, (& turnip greens)	annual	herb	forb		leaf		93.2375	0.698286	136.328	1.23139	23.8571	0.229677	0.183361	73.8571	55.2571	0.845769
Brassica	oleracea brussel sprouts	brussels sprouts	annual	herb	forb		leaf		85.4	2.7	51.5	1.45	24.5	0.42	0	61	91.5	0.88
Brassica	oleracea	cabbage	annual	herb	forb		leaf		91.7125	1.15462	48.2846	0.735833	17.7143	0.266667	0.0199771	49.5	46.6615	0.2025
Brassica	oleracea	kohlrabi	annual	herb	forb		stem		91	1.1	42	0.5	27		0.00125		64
Celosia	argentea	quail grass	annual	herb	forb		leaf		85.15	1.506	211	4.364		0.9	0.764511	159	36.5	1.8
Chenopodium	quinoa	quinoa	annual	herb	forb		leaf		84	2.1	280	2.1			0.565		90
Cichorium	endiva	endive	annual	herb	forb		leaf		93.9	1.365	45	0.61	14	0.466667	0.073538	53.3333	7.625	0.4
Cleome	gynandra	cleome	annual	herb	forb		leaf		86.6	1.03167	237.833	3.125		0.818	1.29818	246.8	124	2.06
Corchorus	capsularis	white jute	annual	herb	forb		leaf			2.155	283.5	2.655		0.16	1.22222	53	84	2.82
Corchorus	olitorius	molokhia	annual	herb	forb		leaf		84.0667	1.66364	251.333	4.355	64	0.714444	0.480183	96.1111	97.8182	3.14111
Cosmos	caudatus	vegetable cosmos	annual	herb	forb		leaf		93	1.6	270
Crassocephalum	crepidioides	redflower ragleaf	annual	herb	forb		leaf		79	1.35	142.333	1.615		0.415	0.40796		12
Emilia	sonchifolia	lilac tasselflower	annual	herb	forb		leaf			1.03	172	2.4		0.86	0.61194		23
Eruca	vesicaria	wild arugula	annual	herb	forb		leaf			1.13	387.5	1.77			0.626036		275.5	1.09
Eruca	sativa	arugula	annual	herb	forb		leaf		91.75	1.11333	224	1.33667	47	0.44	0.152872	92	53.65	1.21
Foeniculum	vulgare	Florence fennel	annual	herb	forb		petiole		88	0.5	73	1.5	36		0.005		20
Glebionis	coronaria	garland chrysanthemum	annual	herb	forb		leaf		91.8	0.904444	86.7	1.77364	32	0.27	0.283876	100.5	15.9455	15.0762
Glycine	max	edamame soybean	annual	herb	forb		unripe seed		67.5	2.37333	113.333	3.46333	65	1.235	0.0142557	132.5	30.6667	6.46
Hibiscus	sabdariffa	roselle	annual	herb	shrub		leaf		85.6	1.31	192.667	2.39333			0.414594		36.6667	1.95
Lactuca	indica	Indian lettuce	annual	herb	forb		leaf			1.14	94	0.99		0.22	0.0364842		24
Lactuca	sativa	lettuce	annual	herb	forb		leaf		95.037	0.702632	37.4211	1.01526	12.9	0.170714	0.118459	62.4	8.72526	0.362308
Lepidium	sativum	cress	annual	herb	forb		leaf		88.2	1.1	179	2.5					73
Malva	verticillata	mallow	annual	herb	forb		leaf			1.09	252	4.61		0.85	0.784964	31	97.6667	1.79333
Physalis	ixocarpa	tomatillo	annual	herb	forb		fruit		90.315	1.9	13.5	1.21	50.5	0.22	0.0095	7	10.85	0.38
Pisum	sativum	pea	annual	herb	forb		unripe fruit		88.245	2.2	46.5	1.69	24	0.27	0.0373	42	56	0.39
Pisum	sativum	pea	annual	herb	forb		unripe seed		74.6	2.2	30	1.8	35		0.039		33
Portulaca	oleracea	purslane	annual	herb	forb		leaf		93.9	0.5475	60.2	1.394	68	0.44	0.300431	12	10.8	0.47
Raphanus	sativus	radish pod	annual	herb	forb		unripe fruit		90.5	1.4	80	2.8			0.0025		69
Sonchus	oleraceus	sow-thistle	annual	herb	forb		leaf		87.5	3.3	62.5	3.45	76	0.8	1.54395		39.25
Spinacea	oleracea	spinach	annual	herb	forb		leaf		91.2	0.956	88.4	2.106	85.5	0.486667	0.362301	194	35.22	1.70667
Valerianella	locusta	mache	annual	herb	forb		leaf		93.1	0.8	35	1.7	13				35
Vicia	faba	fava bean	annual	herb	forb		unripe fruit		72.6	7.5	37	1.55	33	1	0.00665	148	3.7	1.16
Vicia	faba	fava bean	annual	herb	forb		unripe seed		78.2	3.65	26	2	38	0.58	0.0175	96	33
Zea	mays	sweet corn	annual	herb	grasslike		unripe seed		75.77	1.81667	13	0.713333	39.6667	0.455	0.005825	21.0275	8.53333	0.07
Benincasa	hispida	wax gourd	annual	vine	herbaceous		fruit		96.05	1.482	16.6667	0.385	12	0.325	0.00525	5	22.3333	0.085
Canavalia	ensiformis	jack bean	annual	vine	herbaceous		unripe fruit		89	5.4834	34.2
Canavalia	ensiformis	jack bean	annual	vine	herbaceous		unripe seed		85.6667	2.2973	50.9996	1.73133			0.00229125		31.992
Cucumis	anguria	West Indian gherkin	annual	vine	herbaceous		fruit		93	0.6	26	0.6	32		0.0900625		51
Cucumis	metuliferus	kiwano melon	annual	vine	herbaceous		fruit		91	1.1	11.9	0.53	22.3				19
Cucumis	melo	pickling melon	annual	vine	herbaceous		fruit			0.24	11	0.39			0.00331675		10	0.07
Cucumus	sativus	cucumber	annual	vine	herbaceous		unripe fruit		95.8333	0.404167	22.5167	0.709091	12.6667	0.233	0.00967632		10.9	0.112222
Cucurbita	maxima	winter squash	annual	vine	herbaceous		flower			0.75	92	1.03		0.45	0.0215589	30	14	4.16
Cucurbita	spp.	winter squash	annual	vine	herbaceous		flower		93.65	0.65	59.5	0.7	24		0.09735	59	28
Cucurbita	moschata	winter squash	annual	vine	herbaceous		fruit		86.4	2	48	0.7	34	0.15	0.5315	27	21	1.44
Cucurbita	pepo	winter squash	annual	vine	herbaceous		fruit		89.59	1.35	27.5	0.75	21	0.13	0.049175	17	10
Cucurbita	spp	winter squash	annual	vine	herbaceous		fruit		88.8	1.32	25	0.7	22		0.099		10
Cucurbita	maxima	winter squash	annual	vine	herbaceous		fruit		88	2.37	11.5	0.565	19	0.205	0.0408085	14	10	0.68
Cucurbita	spp.	winter squash	annual	vine	herbaceous		leaf		90.45	1.8	171	1.85	38	0.2	0.0971	36	28
Cucurbita	maxima	winter squash	annual	vine	herbaceous		leaf			1.13	102	1.675		0.63	0.0729685	64.5	28	2.61
Cucurbita	moschata	winter squash	annual	vine	herbaceous		leaf			1.11	31	1.69		0.37	0.0713101		9
Cucurbita	maxima	winter squash	annual	vine	herbaceous		unripe fruit			0.69	20	0.57			0.00497512	10	8	0.47
Cucurbita	pepo	summer squash	annual	vine	herbaceous		unripe fruit		94.145	0.825	19	0.435	18.5		0.012975		18.45	0.12
Cucurbita	spp.	summer squash	annual	vine	herbaceous		unripe fruit		94.45	1.05	18	0.395	18.5	0.29	0.00875	24	18.15	0.125
Cyamopsis	tetragonolobus	cluster bean	annual	vine	herbaceous		unripe fruit		81	1.59	116	2.81		0.65	0.0518469	116	51	1.05
Cyclanthera	pedata	acocha	annual	vine	herbaceous		unripe fruit		94.1	0.7	14	0.8					14
Lagenaria	siceraria	bottle gourd	annual	vine	herbaceous		unripe fruit		95.12	0.474444	17.6111	0.428571	11	0.251429	0.0426136	6	10.5667	0.075
Luffa	cylindrica	luffa	annual	vine	herbaceous		flowerbud			1.23	58	1.16			0.182421		20	1.11
Luffa	acutangula	luffa	annual	vine	herbaceous		unripe fruit		94.4	1.1	15	0.4			0.476574	37	7.5
Luffa	cylindrica	luffa	annual	vine	herbaceous		unripe fruit		93.7	0.32	14.8333	0.594	19	0.17	0.00827225		8.08333	0.115
Momordica	charantia	bitter gourd	annual	vine	herbaceous		leaf		84.65	1.39	174	4.55	85		0.08675		167.5
Momordica	charantia	bitter gourd	annual	vine	herbaceous		unripe fruit		93.65	1.03923	19.6154	0.563077	17	0.246364	0.0134048	72	63.2308	1.05429
Phaseolus	vulgaris	common bean	annual	vine	herbaceous		unripe fruit		90.4967	2.43333	41.3333	0.99	28	0.24	0.0224667	35	15.8333	0.41
Trichosanthes	cucumerina	snake gourd	annual	vine	herbaceous		unripe fruit		93.6	0.8475	22	0.46			0.00944458	15	7.25	0.04
Vigna	unguiculata	cowpea	annual	vine	herbaceous		leaf		89.78	1.74	259.846	1.88923	43	0.623077	0.564485	133.071	76.5	3.26231
Vigna	unguiculata	cowpea, yardlong bean	annual	vine	herbaceous		unripe fruit		86.75	1.7	60	1.054	51.6	0.336667	0.05834	56	26.16	0.49
Vigna	unguiculata	cowpea	annual	vine	herbaceous		unripe seed		73.7333	3.93333	93.6667	1.43333	51	1.005	0.0197	168	11.3333
Cajanus	cajan	pigeon pea	A/P	woody	shrub		green pod		85.2
Cajanus	cajan	pigeon pea	A/P	woody	shrub		unripe seed		68.3	3.76467	35.9959	1.40555	68	1.625	0.00847069	173	30.0023	0.39
Abelmoschus	esculentus	okra	A/P	herb	shrub		unripe fruit		88.48	1.06992	69.3074	0.955338	51.5	0.41	0.0240875	34.75	31.0002	0.44625
Allium	chinense	rakkyo	A/P	herb	forb		leaf				91	3			0.025		39
Allium	fistulosum	Welsh onion	A/P	herb	forb		leaf		91	1.08333	70.8571	1.46333	23	0.342	0.0336667	16	30.8571	0.225
Allium	ampeloprasum	leek	A/P	herb	forb		leaf		84.7167	1.94516	59.9347	1.523	23.3667	0.436	0.0730042	145	13.786	0.05
Angelica	keiskei	asitaba	A/P	herb	forb		leaf		88.6	2.335	298	1.5475	26	0.966667		69.75	71.75	7.5975
Barbarea	vulgaris	wintercress	A/P	herb	forb		flowerbud		82.5		159.5	2.3			0.101		227.5
Brassica	oleracea	kale & collards	A/P	herb	forb		leaf		87.56	1.605	238.7	1.551	51.75	0.32125	0.263594	99.3333	91.33	1.51
Brassica	napus	ragged jack kale	A/P	herb	forb		leaf		87	1.23	205	3	88		0.155		130
Brassica	napus	ragged jack kale	A/P	herb	forb		leaf		87	1.23	205	3	88		0.155		130
Brassica	carinata	Ethiopian kale	A/P	herb	forb		leaf			1.37667	157	1.33333		0.92	0.15257	86.5	157	1.25667
Brassica	oleracea	gai lan	A/P	herb	forb		flowerbud		90.25	2.6	83.5	1.4	19	0.41	0.336807	104	72.3	0.5
Capsicum	annuum	pepper	A/P	herb	shrub		fruit		87.6911	1.33842	17.4948	1.12981	17.3333	0.244615	0.114079	24.3333	116.795	2.12091
Capsicum	pubescens	rocoto pepper	A/P	herb	shrub		fruit		89.15	0.9951	6.00135	0.74775			0.025		35.4945
Capsicum	annuum	pepper	A/P	herb	shrub		leaf			1.235	216	2.08		0.48	0.401327	53	70.5	0.4
Cichorium	intybus	chicory	A/P	herb	forb		leaf		92.4429	1.89283	78.9997	0.989629	19.56	0.317667	0.270227	137.667	19.3331	2.305
Cynara	cardunculus	cardoon	A/P	herb	forb		petiole		94	1.2991	68.9998	1.1002	21.35	0.17	0.00925	68	1.66607
Ipomoea	aquatica	water spinach	A/P	herb	forb	aquatic	leaf		89.525	1.24215	126.735	3.65899	60	0.42125	0.335889	29.6667	48.1608	1.43875
Ipomoea	batatas	sweet potato	A/P	herb	forb		leaf		86.7	1.68908	124.416	2.31427	55.3333	0.381667	0.361253	47.6667	29.9236	1.65571
Malva	sylvestris	mallow	A/P	herb	forb		leaf		85.65	2.1844	226.499	5.3	82	2.2	0.147389		75.3329
Nasturtium	officinale	watercress	A/P	herb	forb	aquatic	leaf		92.961	0.9214	141.939	1.73135	20.25	0.595	0.219003	9	60.3186	1
Solanum	pimpinellifolium	currant tomato	A/P	herb	forb		fruit		93.2	0.4	29	1.7			0.1		50
Solanum	aethiopicum	African eggplant	A/P	herb	forb		fruit		90.8	1.51659	18.9288	1.171		0.2	0.0334308	21.8182	10.8614	0.868182
Solanum	melongena	eggplant	A/P	herb	forb		fruit		92.1667	1.17875	14.5	0.758571	15	0.204	0.000914594	13.5	5.65	0.105
Solanum	macrocarpon	gboma eggplant	A/P	herb	forb		fruit		89	1.4732	14.167	0.653333	40	0.25	0.0285	23	16.6667	0.62
Solanum	lycopersicon	tomato	A/P	herb	forb		fruit		94.316	0.563529	12.8235	0.60875	11.25	0.203333	0.0599443	16.8	20.6882	1.47462
Solanum	aethiopicum	African eggplant	A/P	herb	forb		leaf		83.3	2.1862	523.001	4.25825		0.81	0.753455		59.3332	7.31
Solanum	macrocarpon	gboma eggplant	A/P	herb	forb		leaf		85.8667	1.59947	391.001	0.3
Solanum	americanum	black nightshade	A/P	herb	forb		leaf		85	1.09	213.5	4.225		0.28	1.199		51
Solanum	scabrum	black nightshade	A/P	herb	forb		leaf		87.8	1.37	196.333	3.55		0.93	0.840796	69.5	91.6667	2.35
Solanum	villosum	red-fruited nightshade	A/P	herb	forb		leaf			1.31	175	3.26		0.8	0.489221	61	79	2.14
Tetragonia	tetragonioides	New Zealand spinach	A/P	herb	forb		leaf		93	1.01261	104.807	2.23045	39.3333	0.36	0.310527	32.6667	31.6364	1.56333
Lablab	purpureus	lablab bean	A/P	vine	herbaceous		unripe fruit		87	1.62	54.1	1.68	37	0.686667	0.143062	41.3333	17.3333	0.15
Lablab	purpureus	lablab bean	A/P	vine	herbaceous		unripe seed		87.885	3.3	50	0.97	40	0.37	0.003775	62	12.9	0.51
Abelmoschus	manihot	edible hibiscus	perennial	woody	shrub		leaf		89.6667	1.8025	401	2.09667	18	1.4	0.045		86	3.255
Acacia	pennata	garlic acacia	perennial	woody	tree		leaf		82.4	3.9	41	2.5		0.5			47
Acacia	coriacea	gunandru	perennial	woody	tree		unripe seed		56.8	3.3	137	3.2	75
Adansonia	digitata	baobab	perennial	woody	tree		leaf		77.65	1.99375	297.375	1.83375	26	0.8525	0.225	36.75	61.5	4.01333
Aralia	elata	angelica tree	perennial	woody	tree		leaf		86.0667	2.86933	54.336	5.236	33	0.8		160	8.5	4.3
Atriplex	halimus	saltbush	perennial	woody	shrub		leaf		0.6	5.74	912	18.6	610
Averrhoa	bilimbi	bilimbi	perennial	woody	tree		fruit		94.3667	0.65	7.7	0.705			0.0365		15.6
Bactris	gasipaes	peach palm	perennial	woody	palm		fruit		53.5375	5.34	36.78	1.474	24.42	0.315	0.182421		18.7
Bactris	gasipaes	peach palm	perennial	woody	palm		shoot		89.5567	0.91	80.8	1.74333	30.8	0.79			9.35
Balanites	aegyptiaca	balanites	perennial	woody	tree		leaf		33.7	6.76	106.08
Bambusa	polymorpha	bamboo	perennial	woody	bamboo		shoot		90.26	3.81	560		140				2.6	0.49
Bambusa	vulgaris	bamboo	perennial	woody	bamboo		shoot		88.275	2.895	115	0.515	54.14	0.37		17.05	10.185	0.29
Bambusa	bambos	bamboo	perennial	woody	bamboo		shoot		90.265	2.02	33	0.4			0.372667		2.95	0.61
Bambusa	spp.	bamboo	perennial	woody	bamboo		shoot		90.7	1.7679	16.6661	0.635633	3		0.00185417		6.39912
Bambusa	balcooa	bamboo	perennial	woody	bamboo		shoot		71.22	0.96	13.1	0.21	0.52	0.97
Bambusa	tulda	bamboo	perennial	woody	bamboo		shoot		83.6	3.97	4.06	2.69	6.09	0.7			1.42	0.61
Bambusa	nutans	bamboo	perennial	woody	bamboo		shoot		92	2.28							2.6	0.47
Bauhinia	variegata	orchid tree	perennial	woody	tree		pods and unripe seeds		70.5	2.8	294	2.9
Blighia	sapida	akee	perennial	woody	tree		fruit aril		69	1.2958	41.6546	4.0402		1.24	0.0462492		25.9952
Broussonetia	luzonica	anabó	perennial	woody	tree		flowerbud		77.8	2.3984	281.997	6.8048			0.0975		23.9952
Canarium	odontophyllum	dabai	perennial	woody	tree		fruit		41.3	4.3	200	1.3	106	0.004
Capsium	baccatum	aji pepper	perennial	woody	shrub		fruit		77.9		48	6.3					61
Carica	papaya	papaya	perennial	woody	tree		unripe fruit		92.2	1.46687	40.9997	0.400067	20	0.2	0.00125		36.3326	0.8
Chamaedora	tepijelote	pacaya	perennial	woody	palm		flowerbud		85		369	1.4					14
Cnidoscolus	aconitifolius	chaya	perennial	woody	shrub		leaf		79.1	2.39996	277.666	4.60111	88		1.37786		216.667
Crotalaria	longirostrata	chipilin	perennial	woody	shrub		leaf		81.4333	2.48187	314.001	4.69733			0.3335		83.3224
Cyphomandra	betacea	tree tomato	perennial	woody	shrub		fruit		85	2.55936	23.2494	0.713675	20.5	0.02	0.0287181		23.6446
Dacryodes	edulis	safou	perennial	woody	tree		fruit		56	8.1906	43.0116	0.7884					19.0092
Dendrocalamus	hamiltonii	bamboo	perennial	woody	bamboo		shoot		92.855	3.12	4.36	1.55	13.495	0.58		128	2.645	0.416
Dendrocalamus	brandesii	bamboo	perennial	woody	bamboo		shoot		89.8	4.03							1.59	0.42
Dendrocalamus	asper	bamboo	perennial	woody	bamboo		shoot		89.4	3.54							3.2	0.91
Dendrocalamus	membranaceus	bamboo	perennial	woody	bamboo		shoot		89.3	2.91							1.58	0.65
Dendrocalamus	giganteus	bamboo	perennial	woody	bamboo		shoot		90.7	2.65							3.28	0.69
Erythrina	berteroana	colorín	perennial	woody	tree		flower		82.7	2.4	108	2.4			0.0065		37
Erythrina	variegata	pito	perennial	woody	tree		leaf		78.1	3	639.1	4.1
Erythrina	edulis	chachafruto	perennial	woody	tree		unripe seed		80		16	0.77	38	0.56
Euterpe	oleracea	acaí	perennial	woody	palm		shoot		89.8	0.8	86	0.7	9				17
Ficus	spp	"poke" fig leaf	perennial	woody	tree		leaf		65	2.7	5	1	106	0.4			60	2
Gigantochloa	albociliata	bamboo	perennial	woody	bamboo		shoot		89.23	4.15							1	0.6
Gnetum	gnemon	bago	perennial	woody	tree		leaf		73.2	6.30227	150.743	4.35608	70	0.4	0.549972		131.329	2
Gustavia	superba	mebrillo	perennial	woody	tree		fruit		79.7333		34.6667	1.43333	53.3333	0.503333
Leucaena	esculenta	guaje	perennial	woody	tree		unripe seed		71.95	2.56	102.285	2.345	54.9	0.82	0.008		40
Lycium	chinense	goji	perennial	woody	shrub		leaf		89.175	1.64	112.096	3.5348	74	0.42	0.389931	76	20.5995	8.945
Lycium	barbarum	goji	perennial	woody	shrub		fruit		77.1333	2.2	26.6	0.9	12.7	0.5	4.306
Manihot	esculenta	cassava	perennial	woody	shrub		leaf		79.72	2.90333	242	4.33667		1.79	1.01929	95	273.8	13.06
Melientha	suavis	phakwanupa	perennial	woody	tree		leaf		76.6	3.4		3.7			0.26534		115
Melocanna	baccifera	bamboo	perennial	woody	tree		shoot		84		400		50				12.5
Metroxylon	sagu	sago palm	perennial	woody	palm		shoot		91	2.6	68	0.2	37	0.5			2	0.2
Moringa	oleifera	moringa	perennial	woody	tree		flowerbud		84	1.264	345.657	6.9046			0.601328		110.173
Moringa	olerifera	moringa	perennial	woody	tree		leaf		76.332	1.36267	107.982	3.47411	112	0.627143	0.300903	73.7857	218.617	1.61583
Moringa	olerifera	moringa	perennial	woody	tree		unripe fruit		87.36	3.26788	70.2034	3.5429	34	0.45	0.169803	44	123.622
Morus	alba	mulberry	perennial	woody	tree		leaf		73.5	4.08	648.053	14.3775	159.04	1.185	0.6172		220
Oenocarpus	batauta	patauá	perennial	woody	palm		fruit		81.3		30	1.4	12	0.26
Olea	europaea	olive	perennial	woody	tree		fruit		76.75	1.3	56.5	1.045	11		0	3		3.81
Opuntia	joconostle	xoconostle	perennial	woody	cactus		fruit		88.5	3.4	126	0.3			0.002		22
Opuntia	phaecantha	plains prickly pear	perennial	woody	cactus		leaf		89.22	5.3	180	0.2	69	0.138			11.3
Opuntia	ficus-indica	nopale cactus	perennial	woody	cactus		leaf		91.555	2.1475	112	0.5975	52.6667	0.176667	0.0942833	3	11.575	0
Oroxylum	indicum	Indian trumpet flower	perennial	woody	tree		leaf			1.29	26	1.26			0.577114		97	4.16
Parkia	speciosa	petai	perennial	woody	tree		fruit		70.85	0.93855	59.6088	1.3169					22.6603
Parkia	speciosa	petai	perennial	woody	tree		unripe seed		70.45	2.7	86.6667	3.03333			0.0367		17
Parmentiera	aculeata	guajilote	perennial	woody	tree		fruit		74.5	10.5956	101.685	0.9408					8.036
Persea	schiedeana	chinene	perennial	woody	tree		fruit		73.9	2.0003	12.501	0.50305			0.005		11.5009
Persea	americana	avocado	perennial	woody	tree		fruit		76.4123	2.79697	11.8472	0.690931	26.1667	0.56	0.0139629	53.5	13.3059	1.45
Phyllostachys	spp.	bamboo shoots, raw	perennial	woody	bamboo		shoot		91	2.2	13	0.5	3	1.1	0.0035	7	4	1
Piper	auritum	hoja santa	perennial	woody	shrub		leaf		84.5333	1.8	297	5.06667			0.336		52.6667
Pisonia	umbellifera	lettuce tree	perennial	woody	tree		leaf		86	5.4	310	1.3	165	0.4			34
Polyscias	fruticosa	ming aralia	perennial	woody	shrub		leaf		82		474	6.2			0.20875		29
Pterocarpus	mildbraedii	padouc blanc	perennial	woody	tree		leaf		85	1.115	72	4.8	40	5
Salix	reticulata	snow willow	perennial	woody	shrub		shoot		67		267	5.7	167	3.5
Salix	arctica	arctic willow	perennial	woody	shrub		shoot		69		188	2.9	8	4.1
Salix	(probably S. pluchra)	willow	perennial	woody	shrub		leaf		68.7		130	2.6			0.935		190
Sauropus	androgynus	katuk	perennial	woody	shrub		leaf		80.2	1.726	161.571	3.15686			0.876589	110	123.856	6.25
Senna	obtusifolia	sicklepod	perennial	woody	shrub		leaf		78.3	2.45	349.5	6.15	40		1.31012		120.5
Senna	sophera	positive bright	perennial	woody	shrub		leaf			1.51	202	2.29		0.88	1.01493	135	176	4.77
Senna	siamea	kassod tree	perennial	woody	tree		leaf		73.3667	3.84507	83.0002	2.4444			0.496401		55.5008
Sesbania	grandiflora	vegetable humminbird	perennial	woody	tree		flower		90.29	1.02	16.8	0.81	12	0.33	0.00829187	57.3333	55.5	0.475
Sesbania	grandiflora	vegetable humminbird	perennial	woody	tree		leaf		78.2333	7.8	577.5	3.58667	96.94	0.53		120	91.6667	1.77
Solanum	torvum	pea eggplant	perennial	woody	shrub		fruit		84.1429	9.06213	91.0245	2.12488	36.2	0.455	0.0268068	327	26.3688	0.735
Sonneratia	caseolaris	mangrove apple	perennial	woody	mangrove	aquatic	fruit		80	5.7	40	0.9
Tilia	cordata	linden	perennial	woody	tree		leaf		65	0.17	158.9	1.7	12.2	0.23
Toona	sinensis	fragrant spring tree	perennial	woody	tree		leaf		84.6	1.96187	434.499	6.8436		2.25	1.93571	28	123.333	19.8767
Trichanthera	gigantea	nacadero	perennial	woody	shrub		leaf		83.2		1107.5	5.4275	174.75	0.705
Ulmus	spp (assumed pumila)	elm	perennial	woody	tree		fruit		85.2	4.3	62	7.9		3.27	0.06		11	0.54
unspecified		hearts of palm, raw	perennial	woody	palm		shoot		69.5	1.5	18	1.69	10	3.73	0.0034	24	8	0.5
Vernonia	hymenolepis	sweet bitterleaf	perennial	woody	shrub		leaf		82.6	1.46	163.667	1.8		0.63	0.240464	96	49.6667	0.865
Vernonia	amygdalina	bitterleaf	perennial	woody	shrub		leaf		82.8	5.1	162	2.8	58	1.01		62	11	1.64
Yucca	gigantea	izote	perennial	woody	succulent		flower		83.2		34	1.4					393
Yucca	aloifolia	izote	perennial	woody	succulent		flower		73.45	1.135	31.265	0.385	22.675	0.335	0.019485	14.355	17.695
Acmella	oleracea	spilanthes	perennial	herb	forb		leaf		90.3333		162	4			0.195		20
Aegopodium	podagraria	goutweed	perennial	herb	forb		leaf		82.2		132	2.9	35	1			142
Allium	tuberosum	garlic chives	perennial	herb	forb		flowerstalk		91.4	2	23.5	1.1	13.5	0.315	0.043	120	19	0.22
Allium	tuberosum	garlic chives	perennial	herb	forb		leaf		92.24	1.315	56.9444	1.33556	36.9333	0.2975	0.09	108.1	22.905	1.49333
Allium	hookeri	napakpi	perennial	herb	forb		leaf		39.9	0.96	41.7	2.08	50.8	0.49	0	177	0.71	0.37
Allium	tuberosum	garlic chives	perennial	herb	forb		leaf blanched		94	1.95	13	2.45	16.5	0.77	0.08	76	8	0.63
Allium	ampeloprasum	kurrat leek	perennial	herb	forb		leaf		82.6	1.4	117		36				18
Allium	ursinum	ramsons	perennial	herb	forb		leaf		89.4	2.18	76	2.9	22	0.27			150
Allium	tricoccum	ramps	perennial	herb	forb		leaf										16.7
Alternanthera	sessilis	sessile joyweed	perennial	herb	forb		leaf		79.2533	3.64627	226.668	2.24	80.9	0.99		48.42	103	0.54
Aralia	cordata	udo	perennial	herb	forb		leaf		94.9	0.7994	11.0001	0.266933	9	0.1		19	4.66693	0.2
Artemisia	princeps	Korean mugwort	perennial	herb	forb		leaf			3	230	3.2		0.3			44
Artemisia	lactiflora	white mugwort	perennial	herb	forb		leaf		88	1.22807	104.002	2.03717		0.24	0.225		27.9987
Asclepias	syriaca	milkweed	perennial	herb	forb		leaf		80		437	6.3			0.605		391
Asparagus	officinalis	asparagus	perennial	herb	forb		shoot		92.42	0.959856	22.8004	1.11756	16.3333	0.468	0.0410583	80	24.845	1.565
Asplenium	nidus	birds nest fern	perennial	herb	fern		shoot			0.94	45	0.68		0.39	0.04525		67
Asystasia	gangetica	tropical violet	perennial	herb	forb		leaf			1.39667	151.667	2.12667		0.29	0.846324	27	37.6667	2.98
Bellis	perennis	English daisy	perennial	herb	forb		leaf				190	2.7	33		0.0133333
Beta	vulgaris var. maritima	sea beet	perennial	herb	forb		leaf		88.15	3.99	128.55	3.44	61.95	0.5375		302	36.4	0.67
Brasenia	schreiberi	water sheild	perennial	herb	forb	aquatic	leaf		98.6	1	4	0	2	0.2		3	0	0.1
Centella	asiatica	gotu kola	perennial	herb	forb		leaf		88.1667	2.7003	139.5	5.10075			0.391611		15.0005
Chenopodium	bonus-henricus	good King Henry	perennial	herb	forb		leaf		82.3		120	3.2	58.5	0.9			201.5
Chrysanthemum	indicum	edible chrysanthemum	perennial	herb	forb		leaf				14.14	1.51	2.7	7.8
Colocasia	esculenta	taro	perennial	herb	forb		petiole		93.6667	1.0537	52.9996	0.6519	28	0.47	0.018267		5.33333	0.1
Colocasia	antiquorum	eddo	perennial	herb	forb		petiole			0.66	16	0.42			0.0613599		3	0.06
Colocasia	esculenta	taro	perennial	herb	forb		shoot		94.9	0.5	31	0.85	8	0.51	0.20375	3	15.5
Colocasia	esculenta	taro	perennial	herb	forb		leaf		86.0375	2.68427	140.716	2.5066	45.4	0.47	0.248503	104.25	56.4	1.5075
Commelina	benghalensis	géwor	perennial	herb	forb		leaf		89.15	1.9006	161.497	7.1	77	0.63			20
Crambe	maritima	sea kale	perennial	herb	forb		leaf		94		35	0.5			0.005		26
Crithmum	maritimum	rock samphire	perennial	herb	forb		leaf		86.9	5.14	164	2.995	86.8	0.5825			53.5
Cynara	scolymus	artichoke	perennial	herb	forb		flowerbud		83.6375	3.57573	63.2493	1.33344	42.3333	0.49	0.553533	68	7.71733	0.19
Cyrtosperma	merkusii	giant taro	perennial	herb	forb		leaf		86	1.5
Dicliptera	chinensis	Chinese foldwing	perennial	herb	forb		leaf			1.7	464	2.13			0.731343	34	42	5.1
Diplazium	esculentum	vegetable fern	perennial	herb	fern		shoot		91.8	1.11	23	3.24667		0.36	0.0862355		17.6667
Diplotaxis	tenuifolia	sylvetta	perennial	herb	forb		leaf								0.245627		144
Dystaenia	takesimiana	Korean celery	perennial	herb	forb		leaf		73	5.85
Enydra	fluctuans	buffalo spinach	perennial	herb	forb	aquatic	leaf		92.2	1.3		5.6
Epilobium	angustifolium	fireweed	perennial	herb	forb		leaf		82.7	3.525	163.6	1.68	85.6667	1.68	0.0643	112	147.067	0
Eryngium	aquaticum	marsh eryngo	perennial	herb	forb	aquatic	leaf		86	2.002	294.995	5.7057			0.276667		27.9994
Eryngium	creticum	eryngo	perennial	herb	forb		leaf		88.7	2.1	37	0.6	22				2
Gundelia	tournefortii	galgal	perennial	herb	forb		flowerstalk		82.5	6.37	0.01	0.71	0.01	3.5
Gundelia	tournefortii	galgal	perennial	herb	forb		leaf		95.3	0.5	63	0.8					3
Gynura	bicolor	Okinawa spinach	perennial	herb	forb		leaf			0.783333	128.667	4.23333		0.06	0.315091		13.6667	0.52
Hemerocallis	lilioasphodelus	daylily	perennial	herb	forb		flower				87	1.2			0.15		83
Hemerocallis	lilioasphodelus	daylily	perennial	herb	forb		flowerbud		86.5	1.20335	87.0016	1.2032			0.25375		88
Hemerocallis	spp	daylily	perennial	herb	forb		flowerbud		87	1.2	87	1.2					88
Hemerocallis	fulva	daylily	perennial	herb	forb		flowerbud			0.97	18	0.64			0.0961857		39	2.07
Heracleum	lanatum	cow parsnip	perennial	herb	forb		stalk (peeled)		95	1.15	26.5	0.2	11	0.4		16.1	3.5
Hosta	sieboldii	hosta	perennial	herb	forb		leaf		84.4		342.5	2.27	9.43	4.205
Hosta	longipes	hosta	perennial	herb	forb		leaf		84.4		312	0.78	8.8296	3.588
Hosta	sieboldiana	hosta	perennial	herb	forb		leaf		84.4		304.2	0.5538	8.9388	3.744
Houttyunia	cordata	fish-smelling herb	perennial	herb	forb		leaf			2.03	184.333	3.96333		0.39	0.658928	22	71.3333	3.21
Kaempferia	galanga	chandramula	perennial	herb	forb		leaf		91.1								11
Kalimeris	indica	ma lan	perennial	herb	forb		leaf		88	4.7	88.5	3.05	28	0.785	0.17	170	34	2.46
Lemna	minor	duckweed	perennial	herb	forb		leaf		93		141.998				0.0933333		4.998
Lemna	spp.	duckweed	perennial	herb	forb	aquatic	leaf		94.4	0.73	113.68	30.27		0.94
Limnocharis	flava	water lettuce	perennial	herb	forb	aquatic	stem			2.07	273	0.88		0.33	0.401327	14	60	0.89
Limnocharis	flava	water lettuce	perennial	herb	forb	aquatic	flowerbud		79.34	3.81	770.87		228.1	0.66
Limnocharis	flava	water lettuce	perennial	herb	forb	aquatic	leaf		90		47.5	3.1			0.23		54
Limnophila	rugosa	swamp leaf	perennial	herb	forb	aquatic	leaf			1.805	224	8.24		0.76	0.201493	11	29	3.74
Malva	moschata	mallow	perennial	herb	forb		leaf
Matteuccia	struthiopteris	ostrich fern	perennial	herb	forb		shoot		88.68		32	1.31	34	0.83	0.18085		2.26
Mesymbranthemum	crystallinum	ice plant	perennial	herb	forb		leaf		94		90	0.6			0.1		23
Monochoria	vaginalis	chrach	perennial	herb	forb	aquatic	leaf		90.5333	1.87333	79.5	3.11		0.6	0.659266	36	46.3333	3.73667
Musa	acuminata	banana	perennial	herb	forb		flowerbud				50	0.1
Musa	spp	banana & plantain	perennial	herb	forb		flowerbud		90.2	3.2	40	1.1		0.3			10
Neptunia	oleracea	water mimosa	perennial	herb	forb	aquatic	leaf		87.75	3.93	162.001	3.615	53.4	0.675	0.277	119	13.0302	1.33
Oenanthe	javanica	water celery	perennial	herb	forb	aquatic	leaf		90.88	1.2676	145	3.40977	55.1	0.533333	0.480119	118	29.6524	0.99
Osmunda	japonica	Japanese royal fern	perennial	herb	forb		shoot		89.6	3.76667	9.5	0.7	17	0.5	0.0008	210	19.5	0.7
Oxyria	digyna	mountain sorrel	perennial	herb	forb		leaf		87		116	3.2	75	0.6	0.445		40.785
Persicaria	barbata	smartweed	perennial	herb	forb		leaf		84.5	4.37	130	7.23	160	0.96		287	22.4	0.89
Phragmites	australis	common reed	perennial	herb	grasslike		shoot		95	1.3	103	0.1					32
Physalis	coztomatl	coztomatl	perennial	herb	forb		fruit		90.7	1.32	18	0.51	10	0.07	0.032	7.35	23.4
Physalis	peruviana	goldenberry	perennial	herb	forb		fruit		82.9	3.33173	13.6001	1.11868	19	0.28	0.120292		32.2483
Physalis	spp.	perennial ground cherry	perennial	herb	forb		fruit			2.8	10	0.9			0.036		11
Piper	sarmentosum	pepper leaf	perennial	herb	forb		leaf		70	4.6055	601.003	7.5945			0.440833		10.004
Plantago	major	greater plantain	perennial	herb	forb		leaf		82.1		259.997	2.23633			0.21		34.666
Pluchea	indica	Indian pluchea	perennial	herb	forb		leaf		86		152.5	5.8			0.199		19
Polygonum	bistorta	bistort	perennial	herb	forb		leaf		85		111	3.15	61.5	1.2	0		167.5
Rheum	x cultorum	rhubarb	perennial	herb	forb		petiole		93.6667	1.14197	89.6	0.6712	16		0.00416667	0.0025	11.0009	0.25
Rheum	officinale	rhubarb	perennial	herb	forb		petiole		95	0.6987	51	0.4998					10.0011
Rumex	acetosella	sheep sorrel	perennial	herb	forb		leaf		88	1.1	57	2.3	31	1.2	0.28		33.5
Rumex	acetosa	sorrel	perennial	herb	forb		leaf		91	1.0925	53.75	1.315	68	0.413333	0.134439	16	53.75	0.8
Rumex	patiencia	patience dock	perennial	herb	forb		leaf										25.4
Rumex	arcticus	sour dock	perennial	herb	forb		leaf		89.85	1.1	2	0.8			0.595		68
Rungia	klossii	rungia	perennial	herb	forb		leaf		87.9		272	0.4
Saccharum	edule	pitpit	perennial	herb	grasslike		flowerbud		89	1.66667	7	9.32	48	1.1			18.6667	1.8
Sagittaria	latifolia	arrowhead	perennial	herb	forb	aquatic	leaf				6.5
Sedum	roseum	rhodiola	perennial	herb	forb		leaf		89	0.7	132	0.6			0.259		64
Sesuvium	portulacastrum	seaside purslane	perennial	herb	forb		leaf			0.803	68.002	6.303			0.154167		27.005
Silene	vulgaris	bladder campion	perennial	herb	forb		leaf		85.9	4.36	160	1.93	50.4	0.408	0.81	267	25.5	11.32
Solanum	ferox	tarong pasai	perennial	herb	forb		fruit			2.9	28	0.92			0.0315091		11	0.41
Solanum	chippendalei	kangaroo apple	perennial	herb	forb		fruit		76.2833	0.666667	94
Solanum	ellipticum	desert raisin	perennial	herb	forb		fruit		86	1.8	35
Solanum	centrale	desert raisin	perennial	herb	forb		fruit		61.2
Suaeda	torreyana	romeritos	perennial	herb	forb		leaf		90.7	1.32	18	0.51	10	0.07	0.032	7.35	23.4
Talinum	fruticosum	waterleaf	perennial	herb	forb		leaf		90.86	0.800133	99.7148	3.27772			0.545605		39.5403
Talinum	paniculatum	verdolaga francesa	perennial	herb	forb		leaf			0.76	72	0.94		0.14	0.124378		26
Taraxacum	campylodes	dandelion	perennial	herb	forb		flowerbud		85	1.6	2.9	4.1			0.7		35
Taraxacum	campylodes	dandelion	perennial	herb	forb		leaf		87.4571	1.88046	201.214	3.14717	32.25	0.4288	0.600511	20.5	46.0249	3.085
Trachyandra	falcata	hotnotskool	perennial	herb	forb		leaf		84.9	0.5	165	4.2	56.7				96.2
Typha	latifolia	cattail	perennial	herb	forb	aquatic	shoot		88.55	5.1	79.3333	0.805	63	0.245		10.8	1
Typha	angustifolia	cattail	perennial	herb	forb	aquatic	shoot		92.65	4.5	54	0.91	63	0.24	0.00055		0.7
Typha	spp	cattail	perennial	herb	forb	aquatic	shoot		95	0.9	53	0.2			0		6
Urtica	dioica	stinging nettle	perennial	herb	forb		leaf		86.374	2.86167	454.857	3.986	75.5857	1.4965	0.182806	14	208.46	14.4
Viola	odorata	sweet violet	perennial	herb	forb		flower				15	39	9
Xanthosoma	sagittifolium	yautia, belembe	perennial	herb	forb		leaf		88.8667	2.5439	216.833	2.46	70.6667	0.41			30.6333
Xanthosoma	sagittifolium	yautia, belembe	perennial	herb	forb		shoot		89.75	1.747	26.8573	0.28125			0.142917		25.6812
Zingiber	mioga	mioga ginger	perennial	herb	forb		flowerbud		94.8	1.8997	29.001	0.5487	30	0.4	0.00125	25	3.4998	1.4
Zingiber	mioga	mioga ginger	perennial	herb	forb		shoot		97.1	1.1	11	0.3	7	0.3		13	1	0.4
Zizania	latifolia	Manchurian water rice	perennial	herb	grasslike		shoot		88.2	1.65	9.33333	0.4	8	0.2		43	3.33333	0
Acanthosicyos	naudianus	gemsbok cucumber	perennial	vine	herbaceous		fruit					4
Anredera	cordifolia	Madeira vine	perennial	vine	herbaceous		leaf			0.46	153	1.26				14	36	6.09
Basella	alba	Malabar spinach	perennial	vine	herbaceous		leaf		92.275	0.72615	107.152	1.77006	56.5	0.43	0.373419	113.75	82.4822	1.38
Calamus	formosanus	rattan	perennial	vine	woody		shoot			0.77	79	1.04		2.41	0.00331675		8
Canavalia	gladiata	sword bean	perennial	vine	herbaceous		unripe fruit		87.0667	1.96667	41	8.6	29	0.84	0.0185		23.5	0.4
Canavalia	gladiata	sword bean	perennial	vine	herbaceous		unripe seed		89	1.503					0.002
Coccinia	sessilifolia	Kalahari cucumber	perennial	vine	herbaceous		fruit		82.3	0.75	37.95	1.2	2.2				24.75
Coccinia	grandis	ivy gourd	perennial	vine	woody		fruit ripe			5.37	105	2.06			0.232172		5	6
Coccinia	grandis	ivy gourd	perennial	vine	woody		fruit unripe		92.8333	3.07333	52.3333	1.45		0.5	0.0331675		15
Coccinia	grandis	ivy gourd	perennial	vine	woody		leaf		90.6	0.936667	59.6667	2.1825			0.516542	98	51.3333	1.105
Combretum	indicum	rangoon creeper	perennial	vine	woody		leaf		75	1.9926	104.009				0.555417		70.0116
Cucurbita	ficifolia	chilacayote	perennial	vine	herbaceous		fruit		91.44	0.4016	22.2003	0.5508			0.202333		12.0003
Cucurbita	ficifolia	chilacayote	perennial	vine	herbaceous		unripe fruit		63.0423	0.29965	12.0004	0.399033					32.9991
Fernaldia	pandurata	loroco	perennial	vine	woody		flowerbud		89.2		58	1.1					12
Gnetum	bucholzianum	eru	perennial	vine	woody		leaf		70	5.4982	130.006	5.587					99.9961
Humulus	lupulus	hops	perennial	vine	herbaceous		shoot		85.8	4.85	73.5	0.74	32.5	0.975	0.03	144	51.5	14.42
Ipomoea	muricata	clove bean	perennial	vine	herbaceous		flowerbud			2	207.335	0.16					36
Lathyrus	japonicus	beach pea	perennial	vine	herbaceous		unripe seed		68
Leptadenia	lancifolia	leptadenia	perennial	vine	herbaceous		leaf		81	4.7	417				0.24575		78
Marsdenia	australis	Austral doubah	perennial	vine	herbaceous		fruit		79.4833	0.75	16.8	2.58	172.25				5
Momordica	cochinchinensis	gac	perennial	vine	woody		fruit		87.1	3.312	26.7333	2.612		0.3	0.0762085	9	258.868	2.94
Momordica	cochinchinensis	gac	perennial	vine	woody		leaf			1.70333	342.667	1.89333		0.576667	1.02875	141.5	935.333	2.48
Momordica	cochinchinensis	gac	perennial	vine	woody		unripe fruit			1.665	35.5	0.605		0.29	0.00912106	6	118.5	5.1
Momordica	dioica	kalsa	perennial	vine	herbaceous		unripe fruit		84.05	3.012	27.068	3.612					248.56
Pentarrhinum	insipidum	African heartvine	perennial	vine	herbaceous		leaf		85	0.5	370	8.75	78.7
Psophocarpus	scandens	African winged bean	perennial	vine	herbaceous		leaf		82		565
Psophocarpus	scandens	African winged bean	perennial	vine	herbaceous		unripe fruit		87		297	0.8
Quisqualis	indica	rangoon creeper	perennial	vine	woody		leaf		75.4	2	104						70
Sechium	edule	chayote	perennial	vine	herbaceous		fruit		91.8264	1.1885	17.1532	0.826708	13.3333	1.03333	0.00167037	93	13.7232	0.065
Sechium	edule	chayote	perennial	vine	herbaceous		leaf		89.62	1.95232	55.1659	1.65242		0.32	0.153891		15.4989
Sicana	odorifera	casabanana	perennial	vine	herbaceous		unripe fruit		87	0.7938	30.996	0.6048			0.00833333		16.002
Telfairia	occidentalis	fluted gourd	perennial	vine	herbaceous		leaf		86.2667	1.7204		0.8					88.6448
Telosma	cordata	kanjalate	perennial	vine	herbaceous		flowerbud			1.18333	27	1.34			0.144831	66.5	71	2.255
Trichosanthes	dioica	parwal	perennial	vine	herbaceous		fruit		92	2.87	30.2333	1.30133	24.5	0.23	0.01275	19.96	25.7467	0.04
Trichosanthes	dioica	parwal	perennial	vine	herbaceous		leaf		95	0.9	53	0.2			0		6
Vitis	vinifera	grape	perennial	vine	woody		leaf		73.32	11	363	2.63	95	0.67	0.7568	83	11.1	2
Phaseolus	coccineus	runner bean	P/A	vine	herbaceous		unripe fruit		58	1.9182	49.9983	2.5854			0.00283333		26.9799
Phaseolus	coccineus	runner bean	P/A	vine	herbaceous		unripe seed		34.1	12.1865	60.9983	4.0898			0.0025		0
Phaseolus	lunatus	Lima bean	P/A	vine	herbaceous		unripe seed		66.7567	2.80285	50.4974	2.89138	54.5	0.78	0.0152733	34	24.2128	0.32
Psophocarpus	tetragonobolus	winged bean	P/A	vine	herbaceous		leaf		78.93	2.93113	238.001	4.039	8	1.28	0.357194	16	39.665
Psophocarpus	tetragonobolus	winged bean	P/A	vine	herbaceous		unripe fruit		90	1.5815	63.251	1.33737	34	0.53	0.0224667		17.5
Psophocarpus	tetragonobolus	winged bean	P/A	vine	herbaceous		unripe seed		89.52	1.7004	84	1.5	34	0.39	0.0064	66	18.3

## Sheet: Ranking by Plant Form
Nutrients by Plant Form and Part Used
Genus	Species	Common Name	Life Cycle	Form	Subform	Aquatic	Part	Source	Water	Fiber	Calcium	Iron mg/100g	Magnesium	Zinc	Vitamin A	Folate (B9)	Ascorbic Acid (C) mg/100g	Tocopherol/Tocotrienol (E)
									%	%	mg/100g	mg/100g	mg/100g	mg/100g	RAE mg/100gm	micrograms (ug)/100gm	mg/100g	mg/100gm
Nutrient Reference Levels									XH	5.10+	477.41+	4.22+	171.01+	1.21+	.73+	388.01+	232.36+	5.09+
									VH	2.55-5.09	238.71-477.40	2.12-4.21	85.51-171.00	0.61-1.20	0.37-0.72	194.01-388.00	116.18-232.35	2.55-5.08
									H	1.83-2.54	161.68-238.70	1.56-2.11	60.27-85.50	0.45-0.60	0.25-0.36	132.64-194.00	78.6-116.17	1.43-2.54
									M	1.12-1.82	86.91-161.67	1.03-1.55	35.76-60.26	0.29-0.44	0.13-0.24	73.08-132.63	42.13-78.59	0.76-1.42
									L	0.40-1.11	12.13-86.90	0.48-1.02	11.25-35.75	0.12-0.28	0.00-0.12	13.50-73.07	5.65-42.12	0.07-0.75
									VL	0-0.39	0-12.12	0-0.47	0-11.24	0-.11	n/a	0-13.49	0-5.64	0-0.06
Woody plants with edible leaves (non-monocots)																				Woody plants with edible leaves (non-monocots)
Abelmoschus	manihot	edible hibiscus	perennial	woody	shrub		leaf		89.6667	1.8025	401	2.09667	18	1.4	0.045		86	3.255		total cells	324
Acacia	pennata	garlic acacia	perennial	woody	tree		leaf		82.4	3.9	41	2.5		0.5			47			total blank	94
Adansonia	digitata	baobab	perennial	woody	tree		leaf		77.65	1.99375	297.375	1.83375	26	0.8525	0.225	36.75	61.5	4.01333		total cells with data	230
Aralia	elata	angelica tree	perennial	woody	tree		leaf		86.0667	2.86933	54.336	5.236	33	0.8		160	8.5	4.3		total XH	34
Atriplex	halimus	saltbush	perennial	woody	shrub		leaf		0.6	5.74	912	18.6	610							total VH	69
Balanites	aegyptiaca	balanites	perennial	woody	tree		leaf		33.7	6.76	106.08									% XH or VH	0.447826
Cnidoscolus	aconitifolius	chaya	perennial	woody	shrub		leaf		79.1	2.39996	277.666	4.60111	88		1.37786		216.667
Crotalaria	longirostrata	chipilin	perennial	woody	shrub		leaf		81.4333	2.48187	314.001	4.69733			0.3335		83.3224
Erythrina	variegata	pito	perennial	woody	tree		leaf		78.1	3	639.1	4.1
Ficus	spp	"poke" fig leaf	perennial	woody	tree		leaf		65	2.7	5	1	106	0.4			60	2
Gnetum	gnemon	bago	perennial	woody	tree		leaf		73.2	6.30227	150.743	4.35608	70	0.4	0.549972		131.329	2
Lycium	chinense	goji	perennial	woody	shrub		leaf		89.175	1.64	112.096	3.5348	74	0.42	0.389931	76	20.5995	8.945
Manihot	esculenta	cassava	perennial	woody	shrub		leaf		79.72	2.90333	242	4.33667		1.79	1.01929	95	273.8	13.06
Melientha	suavis	phakwanupa	perennial	woody	tree		leaf		76.6	3.4		3.7			0.26534		115
Moringa	olerifera	moringa	perennial	woody	tree		leaf		76.332	1.36267	107.982	3.47411	112	0.627143	0.300903	73.7857	218.617	1.61583
Morus	alba	mulberry	perennial	woody	tree		leaf		73.5	4.08	648.053	14.3775	159.04	1.185	0.6172		220
Opuntia	ficus-indica	nopale cactus	perennial	woody	cactus		leaf		91.555	2.1475	112	0.5975	52.6667	0.176667	0.0942833	3	11.575	0
Opuntia	phaecantha	plains prickly pear	perennial	woody	cactus		leaf		89.22	5.3	180	0.2	69	0.138			11.3
Oroxylum	indicum	Indian trumpet flower	perennial	woody	tree		leaf			1.29	26	1.26			0.577114		97	4.16
Piper	auritum	hoja santa	perennial	woody	shrub		leaf		84.5333	1.8	297	5.06667			0.336		52.6667
Pisonia	umbellifera	lettuce tree	perennial	woody	tree		leaf		86	5.4	310	1.3	165	0.4			34
Polyscias	fruticosa	ming aralia	perennial	woody	shrub		leaf		82		474	6.2			0.20875		29
Pterocarpus	mildbraedii	padouc blanc	perennial	woody	tree		leaf		85	1.115	72	4.8	40	5
Salix	arctica	arctic willow	perennial	woody	shrub		leaf		69		188	2.9	8	4.1
Salix	reticulata	snow willow	perennial	woody	shrub		leaf		67		267	5.7	167	3.5
Salix	(probably S. pluchra)	willow	perennial	woody	shrub		leaf		68.7		130	2.6			0.935		190
Sauropus	androgynus	katuk	perennial	woody	shrub		leaf		80.2	1.726	161.571	3.15686			0.876589	110	123.856	6.25
Senna	obtusifolia	sicklepod	perennial	woody	shrub		leaf		78.3	2.45	349.5	6.15	40		1.31012		120.5
Senna	siamea	kassod tree	perennial	woody	tree		leaf		73.3667	3.84507	83.0002	2.4444			0.496401		55.5008
Senna	sophera	positive bright	perennial	woody	shrub		leaf			1.51	202	2.29		0.88	1.01493	135	176	4.77
Sesbania	grandiflora	vegetable humminbird	perennial	woody	tree		leaf		78.2333	7.8	577.5	3.58667	96.94	0.53		120	91.6667	1.77
Tilia	cordata	linden	perennial	woody	tree		leaf		65	0.17	158.9	1.7	12.2	0.23
Toona	sinensis	fragrant spring tree	perennial	woody	tree		leaf		84.6	1.96187	434.499	6.8436		2.25	1.93571	28	123.333	19.8767
Trichanthera	gigantea	nacadero	perennial	woody	shrub		leaf		83.2		1107.5	5.4275	174.75	0.705
Vernonia	amygdalina	bitterleaf	perennial	woody	shrub		leaf		82.8	5.1	162	2.8	58	1.01		62	11	1.64
Vernonia	hymenolepis	sweet bitterleaf	perennial	woody	shrub		leaf		82.6	1.46	163.667	1.8		0.63	0.240464	96	49.6667	0.865
Woody monocot shoots																				Woody monocot shoots
Bactris	gasipaes	peach palm	perennial	woody	palm		shoot		89.5567	0.91	80.8	1.74333	30.8	0.79			9.35			total cells	171
Bambusa	balcooa	bamboo	perennial	woody	bamboo		shoot		71.22	0.96	13.1	0.21	0.52	0.97						total blank	69
Bambusa	bambos	bamboo	perennial	woody	bamboo		shoot		90.265	2.02	33	0.4			0.372667		2.95	0.61		total cells with data	102
Bambusa	nutans	bamboo	perennial	woody	bamboo		shoot		92	2.28							2.6	0.47		total XH	1
Bambusa	polymorpha	bamboo	perennial	woody	bamboo		shoot		90.26	3.81	560		140				2.6	0.49		total VH	13
Bambusa	spp.	bamboo	perennial	woody	bamboo		shoot		90.7	1.7679	16.6661	0.635633	3		0.00185417		6.39912			% XH or VH	0.137255
Bambusa	tulda	bamboo	perennial	woody	bamboo		shoot		83.6	3.97	4.06	2.69	6.09	0.7			1.42	0.61
Bambusa	vulgaris	bamboo	perennial	woody	bamboo		shoot		88.275	2.895	115	0.515	54.14	0.37		17.05	10.185	0.29
Dendrocalamus	asper	bamboo	perennial	woody	bamboo		shoot		89.4	3.54							3.2	0.91
Dendrocalamus	brandesii	bamboo	perennial	woody	bamboo		shoot		89.8	4.03							1.59	0.42
Dendrocalamus	giganteus	bamboo	perennial	woody	bamboo		shoot		90.7	2.65							3.28	0.69
Dendrocalamus	hamiltonii	bamboo	perennial	woody	bamboo		shoot		92.855	3.12	4.36	1.55	13.495	0.58		128	2.645	0.416
Dendrocalamus	membranaceus	bamboo	perennial	woody	bamboo		shoot		89.3	2.91							1.58	0.65
Euterpe	oleracea	acaí	perennial	woody	palm		shoot		89.8	0.8	86	0.7	9				17
Gigantochloa	albociliata	bamboo	perennial	woody	bamboo		shoot		89.23	4.15							1	0.6
Melocanna	baccifera	bamboo	perennial	woody	bamboo		shoot		84		400		50				12.5
Metroxylon	sagu	sago palm	perennial	woody	palm		shoot		91	2.6	68	0.2	37	0.5			2	0.2
Phyllostachys	spp.	bamboo shoots, raw	perennial	woody	bamboo		shoot		91	2.2	13	0.5	3	1.1	0.0035	7	4	1
unspecified		hearts of palm, raw	perennial	woody	palm		shoot		69.5	1.5	18	1.69	10	3.73	0.0034	24	8	0.5
Woody plants with edible flowerbuds and flowers																				Woody plants with edible flowerbuds and flowers
Broussonetia	luzonica	anabó	perennial	woody	tree		flowerbud		77.8	2.3984	281.997	6.8048			0.0975		23.9952			total cells	63
Chamaedora	tepijelote	pacaya	perennial	woody	palm		flowerbud		85		369	1.4					14			total blank	25
Erythrina	berteroana	colorín	perennial	woody	tree		flower		82.7	2.4	108	2.4			0.0065		37			total cells with data	38
Moringa	oleifera	moringa	perennial	woody	tree		flowerbud		84	1.264	345.657	6.9046			0.601328		110.173			total XH	3
Sesbania	grandiflora	vegetable humminbird	perennial	woody	tree		flower		90.29	1.02	16.8	0.81	12	0.33	0.00829187	57.3333	55.5	0.475		total VH	5
Yucca	aloifolia	izote	perennial	woody	succulent		flower		73.45	1.135	31.265	0.385	22.675	0.335	0.019485	14.355	17.695			% XH or VH	0.210526
Yucca	gigantea	izote	perennial	woody	succulent		flower		83.2		34	1.4					393
Woody plants with edible fruits: ripe and unripe																				Woody plants with edible fruits: ripe and unripe
Averrhoa	bilimbi	bilimbi	perennial	woody	tree		fruit		94.3667	0.65	7.7	0.705			0.0365		15.6			total cells	207
Bactris	gasipaes	peach palm	perennial	woody	palm		fruit		53.5375	5.34	36.78	1.474	24.42	0.315	0.182421		18.7			total blank	79
Bauhinia	variegata	orchid tree	perennial	woody	tree		pods and unripe seeds		70.5	2.8	294	2.9								total cells with data	128
Blighia	sapida	akee	perennial	woody	tree		fruit aril		69	1.2958	41.6546	4.0402		1.24	0.0462492		25.9952			total XH	8
Cajanus	cajan	pigeon pea	A/P	woody	shrub		green pod		85.2											total VH	13
Canarium	odontophyllum	dabai	perennial	woody	tree		fruit		41.3	4.3	200	1.3	106	0.004						% XH or VH	0.164062
Capsium	baccatum	aji pepper	perennial	woody	shrub		fruit		77.9		48	6.3					61
Capsicum	annuum	pepper	A/P	herb	shrub		fruit		87.6911	1.33842	17.4948	1.12981	17.3333	0.244615	0.114079	24.3333	116.795	2.12091
Carica	papaya	papaya	perennial	woody	tree		unripe fruit		92.2	1.46687	40.9997	0.400067	20	0.2	0.00125		36.3326	0.8
Cyphomandra	betacea	tree tomato	perennial	woody	shrub		fruit		85	2.55936	23.2494	0.713675	20.5	0.02	0.0287181		23.6446
Dacryodes	edulis	safou	perennial	woody	tree		fruit		56	8.1906	43.0116	0.7884					19.0092
Gustavia	superba	mebrillo	perennial	woody	tree		fruit		79.7333		34.6667	1.43333	53.3333	0.503333
Lycium	barbarum	goji	perennial	woody	shrub		fruit		77.1333	2.2	26.6	0.9	12.7	0.5	4.306
Moringa	olerifera	moringa	perennial	woody	tree		unripe fruit		87.36	3.26788	70.2034	3.5429	34	0.45	0.169803	44	123.622
Oenocarpus	batauta	patauá	perennial	woody	palm		fruit		81.3		30	1.4	12	0.26
Olea	europaea	olive	perennial	woody	tree		fruit		76.75	1.3	56.5	1.045	11		0	3		3.81
Opuntia	joconostle	xoconostle	perennial	woody	cactus		fruit		88.5	3.4	126	0.3			0.002		22
Parkia	speciosa	petai	perennial	woody	tree		fruit		70.85	0.93855	59.6088	1.3169					22.6603
Parmentiera	aculeata	guajilote	perennial	woody	tree		fruit		74.5	10.5956	101.685	0.9408					8.036
Persea	americana	avocado	perennial	woody	tree		fruit		76.4123	2.79697	11.8472	0.690931	26.1667	0.56	0.0139629	53.5	13.3059	1.45
Persea	schiedeana	chinene	perennial	woody	tree		fruit		73.9	2.0003	12.501	0.50305			0.005		11.5009
Solanum	torvum	pea eggplant	perennial	woody	shrub		fruit		84.1429	9.06213	91.0245	2.12488	36.2	0.455	0.0268068	327	26.3688	0.735
Sonneratia	caseolaris	mangrove apple	perennial	woody	mangrove	aquatic	fruit		80	5.7	40	0.9
Ulmus	spp (assumed pumila)	elm	perennial	woody	tree		fruit		85.2	4.3	62	7.9		3.27	0.06		11	0.54
Woody plants with edible unripe seeds																				Woody plants with edible unripe seeds
Acacia	coriacea	gunandru	perennial	woody	tree		unripe seed		56.8	3.3	137	3.2	75							total cells	54
Bauhinia	variegata	orchid tree	perennial	woody	tree		pods and unripe seeds		70.5	2.8	294	2.9								total blank	22
Cajanus	cajan	pigeon pea	A/P	woody	shrub		unripe seed		68.3	3.76467	35.9959	1.40555	68	1.625	0.00847069	173	30.0023	0.39		total cells with data	32
Erythrina	edulis	chachafruto	perennial	woody	tree		unripe seed		80		16	0.77	38	0.56						total XH	1
Leucaena	esculenta	guaje	perennial	woody	tree		unripe seed		71.95	2.56	102.285	2.345	54.9	0.82	0.008		40			total VH	7
Parkia	speciosa	petai	perennial	woody	tree		unripe seed		70.45	2.7	86.6667	3.03333			0.0367		17			% XH or VH	0.25
Perennial vines with edible leaves and shoots																				Perennial vines with edible leaves and shoots
Anredera	cordifolia	Madeira vine	perennial	vine	herbaceous		leaf			0.46	153	1.26				14	36	6.09		total cells	153
Basella	alba	Malabar spinach	perennial	vine	herbaceous		leaf		92.275	0.72615	107.152	1.77006	56.5	0.43	0.373419	113.75	82.4822	1.38		total blank	57
Calamus	formosanus	rattan	perennial	vine	woody		shoot			0.77	79	1.04		2.41	0.00331675		8			total cells with data	96
Coccinia	grandis	ivy gourd	perennial	vine	woody		leaf		90.6	0.936667	59.6667	2.1825			0.516542	98	51.3333	1.105		total XH	8
Combretum	indicum	rangoon creeper	perennial	vine	woody		leaf		75	1.9926	104.009				0.555417		70.0116			total VH	18
Gnetum	bucholzianum	eru	perennial	vine	woody		leaf		70	5.4982	130.006	5.587					99.9961			% XH or VH	0.270833
Humulus	lupulus	hops	perennial	vine	herbaceous		shoot		85.8	4.85	73.5	0.74	32.5	0.975	0.03	144	51.5	14.42
Leptadenia	lancifolia	leptadenia	perennial	vine	herbaceous		leaf		81	4.7	417				0.24575		78
Momordica	cochinchinensis	gac	perennial	vine	woody		leaf			1.70333	342.667	1.89333		0.576667	1.02875	141.5	935.333	2.48
Pentarrhinum	insipidum	African heartvine	perennial	vine	herbaceous		leaf		85	0.5	370	8.75	78.7
Psophocarpus	scandens	African winged bean	perennial	vine	herbaceous		leaf		82		565
Psophocarpus	tetragonobolus	winged bean	P/A	vine	herbaceous		leaf		78.93	2.93113	238.001	4.039	8	1.28	0.357194	16	39.665
Quisqualis	indica	rangoon creeper	perennial	vine	woody		leaf		75.4	2	104						70
Sechium	edule	chayote	perennial	vine	herbaceous		leaf		89.62	1.95232	55.1659	1.65242		0.32	0.153891		15.4989
Telfairia	occidentalis	fluted gourd	perennial	vine	herbaceous		leaf		86.2667	1.7204		0.8					88.6448
Trichosanthes	dioica	parwal	perennial	vine	herbaceous		leaf		95	0.9	53	0.2			0		6
Vitis	vinifera	grape	perennial	vine	woody		leaf		73.32	11	363	2.63	95	0.67	0.7568	83	11.1	2
Perennial vines with edible flowers and flowerbuds																				Perennial vines with edible flowers and flowerbuds
Fernaldia	pandurata	loroco	perennial	vine	woody		flowerbud		89.2		58	1.1					12			total cells	27
Ipomoea	muricata	clove bean	perennial	vine	herbaceous		flowerbud			2	207.335	0.16					36			total blank	13
Telosma	cordata	kanjalate	perennial	vine	herbaceous		flowerbud			1.18333	27	1.34			0.144831	66.5	71	2.255		total cells with data	14
																				total XH	0
																				total VH	0
																				% XH or VH	0
Perennial vines with edible fruits: Ripe and unripe																				Perennial vines with edible fruits: Ripe and unripe
Acanthosicyos	naudianus	gemsbok cucumber	perennial	vine	herbaceous		fruit					4								total cells	162
Canavalia	gladiata	sword bean	perennial	vine	herbaceous		unripe fruit		87.0667	1.96667	41	8.6	29	0.84	0.0185		23.5	0.4		total blank	57
Capsicum	pubescens	rocoto pepper	A/P	herb	shrub		fruit		89.15	0.9951	6.00135	0.74775			0.025		35.4945			total cells with data	105
Coccinia	grandis	ivy gourd	perennial	vine	woody		fruit ripe			5.37	105	2.06			0.232172		5	6		total XH	6
Coccinia	grandis	ivy gourd	perennial	vine	woody		fruit unripe		92.8333	3.07333	52.3333	1.45		0.5	0.0331675		15			total VH	12
Coccinia	sessilifolia	Kalahari cucumber	perennial	vine	herbaceous		fruit		82.3	0.75	37.95	1.2	2.2				24.75			% XH or VH	0.171429
Cucurbita	ficifolia	chilacayote	perennial	vine	herbaceous		fruit		91.44	0.4016	22.2003	0.5508			0.202333		12.0003
Cucurbita	ficifolia	chilacayote	perennial	vine	herbaceous		unripe fruit		63.0423	0.29965	12.0004	0.399033					32.9991
Lablab	purpureus	lablab bean	A/P	vine	herbaceous		unripe fruit		87	1.62	54.1	1.68	37	0.686667	0.143062	41.3333	17.3333	0.15
Marsdenia	australis	Austral doubah	perennial	vine	herbaceous		fruit		79.4833	0.75	16.8	2.58	172.25				5
Momordica	cochinchinensis	gac	perennial	vine	woody		fruit		87.1	3.312	26.7333	2.612		0.3	0.0762085	9	258.868	2.94
Momordica	cochinchinensis	gac	perennial	vine	woody		unripe fruit			1.665	35.5	0.605		0.29	0.00912106	6	118.5	5.1
Momordica	dioica	kalsa	perennial	vine	herbaceous		unripe fruit		84.05	3.012	27.068	3.612					248.56
Phaseolus	coccineus	runner bean	P/A	vine	herbaceous		unripe fruit		58	1.9182	49.9983	2.5854			0.00283333		26.9799
Psophocarpus	scandens	African winged bean	perennial	vine	herbaceous		unripe fruit		87		297	0.8
Psophocarpus	tetragonobolus	winged bean	P/A	vine	herbaceous		unripe fruit		90	1.5815	63.251	1.33737	34	0.53	0.0224667		17.5
Sechium	edule	chayote	perennial	vine	herbaceous		fruit		91.8264	1.1885	17.1532	0.826708	13.3333	1.03333	0.00167037	93	13.7232	0.065
Sicana	odorifera	casabanana	perennial	vine	herbaceous		unripe fruit		87	0.7938	30.996	0.6048			0.00833333		16.002
Trichosanthes	dioica	parwal	perennial	vine	herbaceous		fruit		92	2.87	30.2333	1.30133	24.5	0.23	0.01275	19.96	25.7467	0.04
Perennial vines with edible unripe seeds																				Perennial vines with edible unripe seeds
Canavalia	gladiata	sword bean	perennial	vine	herbaceous		unripe seed		89	1.503					0.002					total cells	54
Lablab	purpureus	lablab bean	A/P	vine	herbaceous		unripe seed		87.885	3.3	50	0.97	40	0.37	0.003775	62	12.9	0.51		total blank	21
Lathyrus	japonicus	beach pea	perennial	vine	herbaceous		unripe seed		68											total cells with data	33
Phaseolus	coccineus	runner bean	P/A	vine	herbaceous		unripe seed		34.1	12.1865	60.9983	4.0898			0.0025		0			total XH	1
Phaseolus	lunatus	Lima bean	P/A	vine	herbaceous		unripe seed		66.7567	2.80285	50.4974	2.89138	54.5	0.78	0.0152733	34	24.2128	0.32		total VH	3
Psophocarpus	tetragonobolus	winged bean	P/A	vine	herbaceous		unripe seed		89.52	1.7004	84	1.5	34	0.39	0.0064	66	18.3			% XH or VH	0.121212
Herbaceous perennials with edible leaves																				Herbaceous perennials with edible leaves
Acmella	oleracea	spilanthes	perennial	herb	forb		leaf		90.3333		162	4			0.195		20			total cells	873
Aegopodium	podagraria	goutweed	perennial	herb	forb		leaf		82.2		132	2.9	35	1			142			total blank	283
Allium	ampeloprasum	leek	A/P	herb	forb		leaf		84.7167	1.94516	59.9347	1.523	23.3667	0.436	0.0730042	145	13.786	0.05		total cells with data	590
Allium	chinense	rakkyo	A/P	herb	forb		leaf				91	3			0.025		39			total XH	31
Allium	fistulosum	Welsh onion	A/P	herb	forb		leaf		91	1.08333	70.8571	1.46333	23	0.342	0.0336667	16	30.8571	0.225		total VH	108
Allium	hookeri	napakpi	perennial	herb	forb		leaf		39.9	0.96	41.7	2.08	50.8	0.49	0	177	0.71	0.37		% XH or VH	0.235593
Allium	tuberosum	garlic chives	perennial	herb	forb		leaf		92.24	1.315	56.9444	1.33556	36.9333	0.2975	0.09	108.1	22.905	1.49333
Allium	tuberosum	garlic chives	perennial	herb	forb		leaf blanched		94	1.95	13	2.45	16.5	0.77	0.08	76	8	0.63
Allium	ampeloprasum	kurrat leek	perennial	herb	forb		leaf		82.6	1.4	117		36				18
Allium	tricoccum	ramps	perennial	herb	forb		leaf										16.7
Allium	ursinum	ramsons	perennial	herb	forb		leaf		89.4	2.18	76	2.9	22	0.27			150
Alternanthera	sessilis	sessile joyweed	perennial	herb	forb		leaf		79.2533	3.64627	226.668	2.24	80.9	0.99		48.42	103	0.54
Angelica	keiskei	asitaba	A/P	herb	forb		leaf		88.6	2.335	298	1.5475	26	0.966667		69.75	71.75	7.5975
Aralia	cordata	udo	perennial	herb	forb		leaf		94.9	0.7994	11.0001	0.266933	9	0.1		19	4.66693	0.2
Artemisia	lactiflora	white mugwort	perennial	herb	forb		leaf		88	1.22807	104.002	2.03717		0.24	0.225		27.9987
Artemisia	princeps	Korean mugwort	perennial	herb	forb		leaf			3	230	3.2		0.3			44
Asclepias	syriaca	milkweed	perennial	herb	forb		leaf		80		437	6.3			0.605		391
Asystasia	gangetica	tropical violet	perennial	herb	forb		leaf			1.39667	151.667	2.12667		0.29	0.846324	27	37.6667	2.98
Bellis	perennis	English daisy	perennial	herb	forb		leaf				190	2.7	33		0.0133333
Beta	vulgaris var. maritima	sea beet	perennial	herb	forb		leaf		88.15	3.99	128.55	3.44	61.95	0.5375		302	36.4	0.67
Brasenia	schreiberi	water sheild	perennial	herb	forb	aquatic	leaf		98.6	1	4	0	2	0.2		3	0	0.1
Brassica	carinata	Ethiopian kale	A/P	herb	forb		leaf			1.37667	157	1.33333		0.92	0.15257	86.5	157	1.25667
Brassica	napus	ragged jack kale	A/P	herb	forb		leaf		87	1.23	205	3	88		0.155		130
Brassica	oleracea	kale & collards	A/P	herb	forb		leaf		87.56	1.605	238.7	1.551	51.75	0.32125	0.263594	99.3333	91.33	1.51
Capsicum	annuum	pepper	A/P	herb	shrub		leaf			1.235	216	2.08		0.48	0.401327	53	70.5	0.4
Centella	asiatica	gotu kola	perennial	herb	forb		leaf		88.1667	2.7003	139.5	5.10075			0.391611		15.0005
Chenopodium	bonus-henricus	good King Henry	perennial	herb	forb		leaf		82.3		120	3.2	58.5	0.9			201.5
Chrysanthemum	indicum	edible chrysanthemum	perennial	herb	forb		leaf				14.14	1.51	2.7	7.8
Cichorium	intybus	chicory	A/P	herb	forb		leaf		92.4429	1.89283	78.9997	0.989629	19.56	0.317667	0.270227	137.667	19.3331	2.305
Colocasia	antiquorum	eddo	perennial	herb	forb		petiole			0.66	16	0.42			0.06		3	0.06
Colocasia	esculenta	taro	perennial	herb	forb		petiole		93.67	1.05	53	0.65	28	0.47	0.02		5.33	0.1
Colocasia	esculenta	taro	perennial	herb	forb		leaf		86.0375	2.68427	140.716	2.5066	45.4	0.47	0.248503	104.25	56.4	1.5075
Commelina	benghalensis	géwor	perennial	herb	forb		leaf		89.15	1.9006	161.497	7.1	77	0.63			20
Crambe	maritima	sea kale	perennial	herb	forb		leaf		94		35	0.5			0.005		26
Crithmum	maritimum	rock samphire	perennial	herb	forb		leaf		86.9	5.14	164	2.995	86.8	0.5825			53.5
Cynara	cardunculus	cardoon	A/P	herb	forb		petiole		94	1.3	69	1.1	21.35	0.17	0.01	68	1.67
Cyrtosperma	merkusii	giant taro	perennial	herb	forb		leaf		86	1.5
Dicliptera	chinensis	Chinese foldwing	perennial	herb	forb		leaf			1.7	464	2.13			0.731343	34	42	5.1
Diplotaxis	tenuifolia	sylvetta	perennial	herb	forb		leaf								0.245627		144
Dystaenia	takesimiana	Korean celery	perennial	herb	forb		leaf		73	5.85
Enydra	fluctuans	buffalo spinach	perennial	herb	forb	aquatic	leaf		92.2	1.3		5.6
Epilobium	angustifolium	fireweed	perennial	herb	forb		leaf		82.7	3.525	163.6	1.68	85.6667	1.68	0.0643	112	147.067	0
Eryngium	aquaticum	marsh eryngo	perennial	herb	forb	aquatic	leaf		86	2.002	294.995	5.7057			0.276667		27.9994
Eryngium	creticum	eryngo	perennial	herb	forb		leaf		88.7	2.1	37	0.6	22				2
Gundelia	tournefortii	galgal	perennial	herb	forb		leaf		95.3	0.5	63	0.8					3
Gynura	bicolor	Okinawa spinach	perennial	herb	forb		leaf			0.783333	128.667	4.23333		0.06	0.315091		13.6667	0.52
Heracleum	lanatum	cow parsnip	perennial	herb	forb		stalk (peeled)		95	1.15	26.5	0.2	11	0.4		16.1	3.5
Hosta	longipes	hosta	perennial	herb	forb		leaf		84.4		312	0.78	8.8296	3.588
Hosta	sieboldiana	hosta	perennial	herb	forb		leaf		84.4		304.2	0.5538	8.9388	3.744
Hosta	sieboldii	hosta	perennial	herb	forb		leaf		84.4		342.5	2.27	9.43	4.205
Houttyunia	cordata	fish-smelling herb	perennial	herb	forb		leaf			2.03	184.333	3.96333		0.39	0.658928	22	71.3333	3.21
Ipomoea	aquatica	water spinach	A/P	herb	forb	aquatic	leaf		89.525	1.24215	126.735	3.65899	60	0.42125	0.335889	29.6667	48.1608	1.43875
Ipomoea	batatas	sweet potato	A/P	herb	forb		leaf		86.7	1.68908	124.416	2.31427	55.3333	0.381667	0.361253	47.6667	29.9236	1.65571
Kaempferia	galanga	chandramula	perennial	herb	forb		leaf		91.1								11
Kalimeris	indica	ma lan	perennial	herb	forb		leaf		88	4.7	88.5	3.05	28	0.785	0.17	170	34	2.46
Lemna	minor	duckweed	perennial	herb	forb		leaf		93		141.998				0.0933333		4.998
Lemna	spp.	duckweed	perennial	herb	forb	aquatic	leaf		94.4	0.73	113.68	30.27		0.94
Limnocharis	flava	water lettuce	perennial	herb	forb	aquatic	stem			2.07	273	0.88		0.33	0.401327	14	60	0.89
Limnocharis	flava	water lettuce	perennial	herb	forb	aquatic	leaf		90		47.5	3.1			0.23		54
Limnophila	rugosa	swamp leaf	perennial	herb	forb	aquatic	leaf			1.805	224	8.24		0.76	0.201493	11	29	3.74
Malva	moschata	mallow	perennial	herb	forb		leaf
Malva	sylvestris	mallow	A/P	herb	forb		leaf		85.65	2.1844	226.499	5.3	82	2.2	0.147389		75.3329
Mesymbranthemum	crystallinum	ice plant	perennial	herb	forb		leaf		94		90	0.6			0.1		23
Monochoria	vaginalis	chrach	perennial	herb	forb	aquatic	leaf		90.5333	1.87333	79.5	3.11		0.6	0.659266	36	46.3333	3.73667
Nasturtium	officinale	watercress	A/P	herb	forb	aquatic	leaf		92.961	0.9214	141.939	1.73135	20.25	0.595	0.219003	9	60.3186	1
Neptunia	oleracea	water mimosa	perennial	herb	forb	aquatic	leaf		87.75	3.93	162.001	3.615	53.4	0.675	0.277	119	13.0302	1.33
Oenanthe	javanica	water celery	perennial	herb	forb	aquatic	leaf		90.88	1.2676	145	3.40977	55.1	0.533333	0.480119	118	29.6524	0.99
Oxyria	digyna	mountain sorrel	perennial	herb	forb		leaf		87		116	3.2	75	0.6	0.445		40.785
Persicaria	barbata	smartweed	perennial	herb	forb		leaf		84.5	4.37	130	7.23	160	0.96		287	22.4	0.89
Piper	sarmentosum	pepper leaf	perennial	herb	forb		leaf		70	4.6055	601.003	7.5945			0.440833		10.004
Plantago	major	greater plantain	perennial	herb	forb		leaf		82.1		259.997	2.23633			0.21		34.666
Pluchea	indica	Indian pluchea	perennial	herb	forb		leaf		86		152.5	5.8			0.199		19
Polygonum	bistorta	bistort	perennial	herb	forb		leaf		85		111	3.15	61.5	1.2	0		167.5
Rheum	officinale	rhubarb	perennial	herb	forb		petiole		95	0.7	51	0.5					10
Rheum	x cultorum	rhubarb	perennial	herb	forb		petiole		93.67	1.14	89.6	0.67	16		0	0	11	0.25
Rumex	acetosa	sorrel	perennial	herb	forb		leaf		91	1.0925	53.75	1.315	68	0.413333	0.134439	16	53.75	0.8
Rumex	acetosella	sheep sorrel	perennial	herb	forb		leaf		88	1.1	57	2.3	31	1.2	0.28		33.5
Rumex	patiencia	patience dock	perennial	herb	forb		leaf										25.4
Rumex	arcticus	sour dock	perennial	herb	forb		leaf		89.85	1.1	2	0.8			0.595		68
Rungia	klossii	rungia	perennial	herb	forb		leaf		87.9		272	0.4
Sagittaria	latifolia	arrowhead	perennial	herb	forb	aquatic	leaf				6.5
Sedum	roseum	rhodiola	perennial	herb	forb		leaf		89	0.7	132	0.6			0.259		64
Sesuvium	portulacastrum	seaside purslane	perennial	herb	forb		leaf			0.803	68.002	6.303			0.154167		27.005
Silene	vulgaris	bladder campion	perennial	herb	forb		leaf		85.9	4.36	160	1.93	50.4	0.408	0.81	267	25.5	11.32
Solanum	aethiopicum	African eggplant	A/P	herb	forb		leaf		83.3	2.1862	523.001	4.25825		0.81	0.753455		59.3332	7.31
Solanum	americanum	black nightshade	A/P	herb	forb		leaf		85	1.09	213.5	4.225		0.28	1.199		51
Solanum	macrocarpon	gboma eggplant	A/P	herb	forb		leaf		85.8667	1.59947	391.001	0.3
Solanum	scabrum	black nightshade	A/P	herb	forb		leaf		87.8	1.37	196.333	3.55		0.93	0.840796	69.5	91.6667	2.35
Solanum	villosum	red-fruited nightshade	A/P	herb	forb		leaf			1.31	175	3.26		0.8	0.489221	61	79	2.14
Suaeda	torreyana	romeritos	perennial	herb	forb		leaf		90.7	1.32	18	0.51	10	0.07	0.032	7.35	23.4
Talinum	fruticosum	waterleaf	perennial	herb	forb		leaf		90.86	0.800133	99.7148	3.27772			0.545605		39.5403
Talinum	paniculatum	verdolaga francesa	perennial	herb	forb		leaf			0.76	72	0.94		0.14	0.124378		26
Taraxacum	campylodes	dandelion	perennial	herb	forb		leaf		87.4571	1.88046	201.214	3.14717	32.25	0.4288	0.600511	20.5	46.0249	3.085
Tetragonia	tetragonioides	New Zealand spinach	A/P	herb	forb		leaf		93	1.01261	104.807	2.23045	39.3333	0.36	0.310527	32.6667	31.6364	1.56333
Trachyandra	falcata	hotnotskool	perennial	herb	forb		leaf		84.9	0.5	165	4.2	56.7				96.2
Urtica	dioica	stinging nettle	perennial	herb	forb		leaf		86.374	2.86167	454.857	3.986	75.5857	1.4965	0.182806	14	208.46	14.4
Xanthosoma	sagittifolium	yautia, belembe	perennial	herb	forb		leaf		88.8667	2.5439	216.833	2.46	70.6667	0.41			30.6333
Herbaceous perennials with edible shoots																				Herbaceous perennials with edible shoots
Asplenium	nidus	birds nest fern	perennial	herb	fern		shoot			0.94	45	0.68		0.39	0.04525		67			total cells	117
Diplazium	esculentum	vegetable fern	perennial	herb	fern		shoot		91.8	1.11	23	3.24667		0.36	0.0862355		17.6667			total blank	28
Asparagus	officinalis	asparagus	perennial	herb	forb		shoot		92.42	0.959856	22.8004	1.11756	16.3333	0.468	0.0410583	80	24.845	1.565		total cells with data	89
Colocasia	esculenta	taro	perennial	herb	forb		shoot		94.9	0.5	31	0.85	8	0.51	0.20375	3	15.5			total XH	0
Matteuccia	struthiopteris	ostrich fern	perennial	herb	forb		shoot		88.68		32	1.31	34	0.83	0.18085		2.26			total VH	6
Osmunda	japonica	Japanese royal fern	perennial	herb	forb		shoot		89.6	3.76667	9.5	0.7	17	0.5	0.0008	210	19.5	0.7		% XH or VH	0.0674157
Typha	angustifolia	cattail	perennial	herb	forb	aquatic	shoot		92.65	4.5	54	0.91	63	0.24	0.00055		0.7
Typha	latifolia	cattail	perennial	herb	forb	aquatic	shoot		88.55	5.1	79.3333	0.805	63	0.245		10.8	1
Typha	spp	cattail	perennial	herb	forb	aquatic	shoot		95	0.9	53	0.2			0		6
Xanthosoma	sagittifolium	yautia, belembe	perennial	herb	forb		shoot		89.75	1.747	26.8573	0.28125			0.142917		25.6812
Zingiber	mioga	mioga ginger	perennial	herb	forb		shoot		97.1	1.1	11	0.3	7	0.3		13	1	0.4
Phragmites	australis	common reed	perennial	herb	grasslike		shoot		95	1.3	103	0.1					32
Zizania	latifolia	Manchurian water rice	perennial	herb	grasslike		shoot		88.2	1.65	9.33333	0.4	8	0.2		43	3.33333	0
Herbaceous perennials with edible flowers and flowerbuds																				Herbaceous perennials with edible flowers and flowerbuds
Allium	tuberosum	garlic chives	perennial	herb	forb		flowerstalk		91.4	2	23.5	1.1	13.5	0.315	0.043	120	19	0.22		total cells	144
Barbarea	vulgaris	wintercress	A/P	herb	forb		flowerbud		82.5		159.5	2.3			0.101		227.5			total blank	53
Brassica	oleracea	gai lan	A/P	herb	forb		flowerbud		90.25	2.6	83.5	1.4	19	0.41	0.336807	104	72.3	0.5		total cells with data	91
Cynara	scolymus	artichoke	perennial	herb	forb		flowerbud		83.6375	3.57573	63.2493	1.33344	42.3333	0.49	0.553533	68	7.71733	0.19		total XH	5
Gundelia	tournefortii	galgal	perennial	herb	forb		flowerstalk		82.5	6.37	0.01	0.71	0.01	3.5						total VH	8
Hemerocallis	fulva	daylily	perennial	herb	forb		flowerbud			0.97	18	0.64			0.0961857		39	2.07		% XH or VH	0.142857
Hemerocallis	lilioasphodelus	daylily	perennial	herb	forb		flower				87	1.2			0.15		83
Hemerocallis	lilioasphodelus	daylily	perennial	herb	forb		flowerbud		86.5	1.20335	87.0016	1.2032			0.25375		88
Hemerocallis	spp	daylily	perennial	herb	forb		flowerbud		87	1.2	87	1.2					88
Limnocharis	flava	water lettuce	perennial	herb	forb	aquatic	flowerbud		79.34	3.81	770.87		228.1	0.66
Musa	acuminata	banana	perennial	herb	forb		flowerbud				50	0.1
Musa	spp	banana & plantain	perennial	herb	forb		flowerbud		90.2	3.2	40	1.1		0.3			10
Saccharum	edule	pitpit	perennial	herb	grasslike		flowerbud		89	1.66667	7	9.32	48	1.1			18.6667	1.8
Taraxacum	campylodes	dandelion	perennial	herb	forb		flowerbud		85	1.6	2.9	4.1			0.7		35
Viola	odorata	sweet violet	perennial	herb	forb		flower				15	39	9
Zingiber	mioga	mioga ginger	perennial	herb	forb		flowerbud		94.8	1.8997	29.001	0.5487	30	0.4	0.00125	25	3.4998	1.4
Herbaceous perennials with edible fruit: Ripe and unripe																				Herbaceous perennials with edible fruit: Ripe and unripe
Abelmoschus	esculentus	okra	A/P	herb	shrub		unripe fruit		88.48	1.06992	69.3074	0.955338	51.5	0.41	0.0240875	34.75	31.0002	0.44625		total cells	117
Physalis	coztomatl	coztomatl	perennial	herb	forb		fruit		90.7	1.32	18	0.51	10	0.07	0.032	7.35	23.4			total blank	38
Physalis	peruviana	goldenberry	perennial	herb	forb		fruit		82.9	3.33173	13.6001	1.11868	19	0.28	0.120292		32.2483			total cells with data	79
Physalis	spp.	perennial ground cherry	perennial	herb	forb		fruit			2.8	10	0.9			0.036		11			total XH	0
Solanum	aethiopicum	African eggplant	A/P	herb	forb		fruit		90.8	1.51659	18.9288	1.171		0.2	0.0334308	21.8182	10.8614	0.868182		total VH	0
Solanum	ferox	tarong pasai	perennial	herb	forb		fruit			2.9	28	0.92			0.0315091		11	0.41		% XH or VH	0
Solanum	lycopersicon	tomato	A/P	herb	forb		fruit		94.316	0.563529	12.8235	0.60875	11.25	0.203333	0.0599443	16.8	20.6882	1.47462
Solanum	macrocarpon	gboma eggplant	A/P	herb	forb		fruit		89	1.4732	14.167	0.653333	40	0.25	0.0285	23	16.6667	0.62
Solanum	melongena	eggplant	A/P	herb	forb		fruit		92.1667	1.17875	14.5	0.758571	15	0.204	0.000914594	13.5	5.65	0.105
Solanum	pimpinellifolium	currant tomato	A/P	herb	forb		fruit		93.2	0.4	29	1.7			0.1		50
Solanum	centrale	desert raisin	perennial	herb	forb		fruit		61.2
Solanum	chippendalei	kangaroo apple	perennial	herb	forb		fruit		76.2833	0.666667	94
Solanum	ellipticum	desert raisin	perennial	herb	forb		fruit		86	1.8	35
Annuals with edible leaves and stems																				Annuals with edible leaves and stems
Allium	ampeloprasum	leek	A/P	herb	forb		leaf		84.7167	1.94516	59.9347	1.523	23.3667	0.436	0.0730042	145	13.786	0.05		total cells	576
Allium	chinense	rakkyo	A/P	herb	forb		leaf				91	3			0.025		39			total blank	100
Allium	fistulosum	Welsh onion	A/P	herb	forb		leaf		91	1.08333	70.8571	1.46333	23	0.342	0.0336667	16	30.8571	0.225		total cells with data	476
Amaranthus	cruentus	amaranth	annual	herb	forb		leaf		84	1.58333	326.333	5.11667		1.795	0.2858	69.3333	60.3333	2.68		total XH	21
Amaranthus	dubious	amaranth	annual	herb	forb		leaf			1.29333	380	2.84		2.90667		64	91.6667	4.105		total VH	74
Amaranthus	hypochondriacus	amaranth	annual	herb	forb		leaf			1.58	260.2	2.3		3.548		68	88.8	1.87		% XH or VH	0.19958
Amaranthus	retroflexus	amaranth	annual	herb	forb		leaf			1.09	630	3.14		1.05		67	63	2.5
Amaranthus	spp.	amaranth	annual	herb	forb		leaf		91.7		215	2.3	55	0.9	0.14585	85
Amaranthus	tricolor	amaranth	annual	herb	forb		leaf			1	272.214	3.81		0.807143		188	66.8333	1.1
Angelica	keiskei	asitaba	A/P	herb	forb		leaf		88.6	2.335	298	1.5475	26	0.966667		69.75	71.75	7.5975
Apium	graveolens	celery	annual	herb	forb		petiole		95.05	1.125	46	0.3	14	0.13	0.015825	36	5.55
Atriplex	hortensis	orach	annual	herb	forb		leaf			0.72	158	1.24		0.35	0.633499	172	44	3.11
Barbarea	verna	winter cress	annual	herb	forb		leaf		90	1	80	1			0.465		70
Beta	vulgaris	chard, beet greens	annual	herb	forb		leaf		90.9571	1.4125	102.75	2.95417	78.25	0.316667	0.242476	32.5714	27.2308	0.92875
Bidens	pilosa	bidens	annual	herb	forb		leaf		82	1.11	118	1.38			0.487106		52.5	1.74
Brassica	carinata	Ethiopian kale	A/P	herb	forb		leaf			1.37667	157	1.33333		0.92	0.15257	86.5	157	1.25667
Brassica	juncea	mustard greens	annual	herb	forb		leaf		91.15	0.896154	152.038	1.24231	30.5	0.230833	0.145533	31	65.6154	1.08083
Brassica	napus	ragged jack kale	A/P	herb	forb		leaf		87	1.23	205	3	88		0.155		130
Brassica	oleracea	cabbage	annual	herb	forb		leaf		91.7125	1.15462	48.2846	0.735833	17.7143	0.266667	0.0199771	49.5	46.6615	0.2025
Brassica	oleracea	kale & collards	A/P	herb	forb		leaf		87.56	1.605	238.7	1.551	51.75	0.32125	0.263594	99.3333	91.33	1.51
Brassica	oleracea	kohlrabi	annual	herb	forb		stem		91	1.1	42	0.5	27		0.00125		64
Brassica	oleracea brussel sprouts	brussels sprouts	annual	herb	forb		leaf		85.4	2.7	51.5	1.45	24.5	0.42	0	61	91.5	0.88
Brassica	rapa	Chinese cabbage, pak choi, (& turnip greens)	annual	herb	forb		leaf		93.2375	0.698286	136.328	1.23139	23.8571	0.229677	0.183361	73.8571	55.2571	0.845769
Capsicum	annuum	pepper	A/P	herb	shrub		leaf			1.235	216	2.08		0.48	0.401327	53	70.5	0.4
Celosia	argentea	quail grass	annual	herb	forb		leaf		85.15	1.506	211	4.364		0.9	0.764511	159	36.5	1.8
Chenopodium	quinoa	quinoa	annual	herb	forb		leaf		84	2.1	280	2.1			0.565		90
Cichorium	endiva	endive	annual	herb	forb		leaf		93.9	1.365	45	0.61	14	0.466667	0.073538	53.3333	7.625	0.4
Cichorium	intybus	chicory	A/P	herb	forb		leaf		92.4429	1.89283	78.9997	0.989629	19.56	0.317667	0.270227	137.667	19.3331	2.305
Cleome	gynandra	cleome	annual	herb	forb		leaf		86.6	1.03167	237.833	3.125		0.818	1.29818	246.8	124	2.06
Corchorus	capsularis	white jute	annual	herb	forb		leaf			2.155	283.5	2.655		0.16	1.22222	53	84	2.82
Corchorus	olitorius	molokhia	annual	herb	forb		leaf		84.0667	1.66364	251.333	4.355	64	0.714444	0.480183	96.1111	97.8182	3.14111
Cosmos	caudatus	vegetable cosmos	annual	herb	forb		leaf		93	1.6	270
Crassocephalum	crepidioides	redflower ragleaf	annual	herb	forb		leaf		79	1.35	142.333	1.615		0.415	0.40796		12
Cucurbita	maxima	winter squash	annual	vine	herbaceous		leaf			1.13	102	1.675		0.63	0.0729685	64.5	28	2.61
Cucurbita	moschata	winter squash	annual	vine	herbaceous		leaf			1.11	31	1.69		0.37	0.0713101		9
Cucurbita	spp.	winter squash	annual	vine	herbaceous		leaf		90.45	1.8	171	1.85	38	0.2	0.0971	36	28
Cynara	cardunculus	cardoon	A/P	herb	forb		petiole		94	1.2991	68.9998	1.1002	21.35	0.17	0.00925	68	1.66607
Emilia	sonchifolia	lilac tasselflower	annual	herb	forb		leaf			1.03	172	2.4		0.86	0.61194		23
Eruca	sativa	arugula	annual	herb	forb		leaf		91.75	1.11333	224	1.33667	47	0.44	0.152872	92	53.65	1.21
Eruca	vesicaria	wild arugula	annual	herb	forb		leaf			1.13	387.5	1.77			0.626036		275.5	1.09
Foeniculum	vulgare	Florence fennel	annual	herb	forb		petiole		88	0.5	73	1.5	36		0.005		20
Glebionis	coronaria	garland chrysanthemum	annual	herb	forb		leaf		91.8	0.904444	86.7	1.77364	32	0.27	0.283876	100.5	15.9455	15.0762
Hibiscus	sabdariffa	roselle	annual	herb	shrub		leaf		85.6	1.31	192.667	2.39333			0.414594		36.6667	1.95
Ipomoea	aquatica	water spinach	A/P	herb	forb	aquatic	leaf		89.525	1.24215	126.735	3.65899	60	0.42125	0.335889	29.6667	48.1608	1.43875
Ipomoea	batatas	sweet potato	A/P	herb	forb		leaf		86.7	1.68908	124.416	2.31427	55.3333	0.381667	0.361253	47.6667	29.9236	1.65571
Lactuca	indica	Indian lettuce	annual	herb	forb		leaf			1.14	94	0.99		0.22	0.0364842		24
Lactuca	sativa	lettuce	annual	herb	forb		leaf		95.037	0.702632	37.4211	1.01526	12.9	0.170714	0.118459	62.4	8.72526	0.362308
Lepidium	sativum	cress	annual	herb	forb		leaf		88.2	1.1	179	2.5					73
Malva	sylvestris	mallow	A/P	herb	forb		leaf		85.65	2.1844	226.499	5.3	82	2.2	0.147389		75.3329
Malva	verticillata	mallow	annual	herb	forb		leaf			1.09	252	4.61		0.85	0.784964	31	97.6667	1.79333
Momordica	charantia	bitter gourd	annual	vine	herbaceous		leaf		84.65	1.39	174	4.55	85		0.08675		167.5
Nasturtium	officinale	watercress	A/P	herb	forb	aquatic	leaf		92.961	0.9214	141.939	1.73135	20.25	0.595	0.219003	9	60.3186	1
Portulaca	oleracea	purslane	annual	herb	forb		leaf		93.9	0.5475	60.2	1.394	68	0.44	0.300431	12	10.8	0.47
Psophocarpus	tetragonobolus	winged bean	P/A	vine	herbaceous		leaf		78.93	2.93113	238.001	4.039	8	1.28	0.357194	16	39.665
Solanum	aethiopicum	African eggplant	A/P	herb	forb		leaf		83.3	2.1862	523.001	4.25825		0.81	0.753455		59.3332	7.31
Solanum	americanum	black nightshade	A/P	herb	forb		leaf		85	1.09	213.5	4.225		0.28	1.199		51
Solanum	macrocarpon	gboma eggplant	A/P	herb	forb		leaf		85.8667	1.59947	391.001	0.3
Solanum	scabrum	black nightshade	A/P	herb	forb		leaf		87.8	1.37	196.333	3.55		0.93	0.840796	69.5	91.6667	2.35
Solanum	villosum	red-fruited nightshade	A/P	herb	forb		leaf			1.31	175	3.26		0.8	0.489221	61	79	2.14
Sonchus	oleraceus	sow-thistle	annual	herb	forb		leaf		87.5	3.3	62.5	3.45	76	0.8	1.54395		39.25
Spinacea	oleracea	spinach	annual	herb	forb		leaf		91.2	0.956	88.4	2.106	85.5	0.486667	0.362301	194	35.22	1.70667
Tetragonia	tetragonioides	New Zealand spinach	A/P	herb	forb		leaf		93	1.01261	104.807	2.23045	39.3333	0.36	0.310527	32.6667	31.6364	1.56333
Valerianella	locusta	mache	annual	herb	forb		leaf		93.1	0.8	35	1.7	13				35
Vigna	unguiculata	cowpea	annual	vine	herbaceous		leaf		89.78	1.74	259.846	1.88923	43	0.623077	0.564485	133.071	76.5	3.26231
Annuals with edible flowers and flowerbuds																				Annuals with edible flowers and flowerbuds
Barbarea	vulgaris	wintercress	A/P	herb	forb		flowerbud		82.5		159.5	2.3			0.101		227.5			total cells	72
Brassica	oleracea	broccoli	annual	herb	forb		flowerbud		89.65	1.26714	54.4429	1.04714	24	0.558333	0.0703213	71	94.1714	0.88		total blank	12
Brassica	oleracea	cauliflower	annual	herb	forb		flowerbud		91	1.355	26	0.85	18.3333	0.368571	0.00329865	57	85.6625	0.16345		total cells with data	60
Brassica	rapa	broccoli raab	annual	herb	forb		flowerbud		92.25	1.85	116.5	1.8	33.5	0.77	0.13305	83	45.1			total XH	0
Brassica	oleracea	gai lan	A/P	herb	forb		flowerbud		90.25	2.6	83.5	1.4	19	0.41	0.336807	104	72.3	0.5		total VH	4
Cucurbita	maxima	winter squash	annual	vine	herbaceous		flower			0.75	92	1.03		0.45	0.0215589	30	14	4.16		% XH or VH	0.0666667
Cucurbita	spp.	winter squash	annual	vine	herbaceous		flower		93.65	0.65	59.5	0.7	24		0.09735	59	28
Luffa	cylindrica	luffa	annual	vine	herbaceous		flowerbud			1.23	58	1.16			0.182421		20	1.11
Annuals with edible fruits: Ripe and unripe																				Annuals with edible fruits: Ripe and unripe
Abelmoschus	esculentus	okra	A/P	herb	shrub		unripe fruit		88.48	1.06992	69.3074	0.955338	51.5	0.41	0.0240875	34.75	31.0002	0.44625		total cells	333
Benincasa	hispida	wax gourd	annual	vine	herbaceous		fruit		96.05	1.482	16.6667	0.385	12	0.325	0.00525	5	22.3333	0.085		total blank	57
Canavalia	ensiformis	jack bean	annual	vine	herbaceous		unripe fruit		89	5.4834	34.2									total cells with data	276
Capsicum	annuum	pepper	A/P	herb	shrub		fruit		87.6911	1.33842	17.4948	1.12981	17.3333	0.244615	0.114079	24.3333	116.795	2.12091		total XH	1
Capsicum	pubescens	rocoto pepper	A/P	herb	shrub		fruit		89.15	0.9951	6.00135	0.74775			0.025		35.4945			total VH	7
Cucumis	anguria	West Indian gherkin	annual	vine	herbaceous		fruit		93	0.6	26	0.6	32		0.0900625		51			% XH or VH	0.0289855
Cucumis	melo	pickling melon	annual	vine	herbaceous		fruit			0.24	11	0.39			0.00331675		10	0.07
Cucumis	metuliferus	kiwano melon	annual	vine	herbaceous		fruit		91	1.1	11.9	0.53	22.3				19
Cucumus	sativus	cucumber	annual	vine	herbaceous		unripe fruit		95.8333	0.404167	22.5167	0.709091	12.6667	0.233	0.00967632		10.9	0.112222
Cucurbita	maxima	winter squash	annual	vine	herbaceous		fruit		88	2.37	11.5	0.565	19	0.205	0.0408085	14	10	0.68
Cucurbita	maxima	winter squash	annual	vine	herbaceous		unripe fruit			0.69	20	0.57			0.00497512	10	8	0.47
Cucurbita	moschata	winter squash	annual	vine	herbaceous		fruit		86.4	2	48	0.7	34	0.15	0.5315	27	21	1.44
Cucurbita	pepo	winter squash	annual	vine	herbaceous		fruit		89.59	1.35	27.5	0.75	21	0.13	0.049175	17	10
Cucurbita	pepo	summer squash	annual	vine	herbaceous		unripe fruit		94.145	0.825	19	0.435	18.5		0.012975		18.45	0.12
Cucurbita	spp	winter squash	annual	vine	herbaceous		fruit		88.8	1.32	25	0.7	22		0.099		10
Cucurbita	spp.	summer squash	annual	vine	herbaceous		unripe fruit		94.45	1.05	18	0.395	18.5	0.29	0.00875	24	18.15	0.125
Cyamopsis	tetragonolobus	cluster bean	annual	vine	herbaceous		unripe fruit		81	1.59	116	2.81		0.65	0.0518469	116	51	1.05
Cyclanthera	pedata	acocha	annual	vine	herbaceous		unripe fruit		94.1	0.7	14	0.8					14
Lablab	purpureus	lablab bean	A/P	vine	herbaceous		unripe fruit		87	1.62	54.1	1.68	37	0.686667	0.143062	41.3333	17.3333	0.15
Lagenaria	siceraria	bottle gourd	annual	vine	herbaceous		unripe fruit		95.12	0.474444	17.6111	0.428571	11	0.251429	0.0426136	6	10.5667	0.075
Luffa	acutangula	luffa	annual	vine	herbaceous		unripe fruit		94.4	1.1	15	0.4			0.476574	37	7.5
Luffa	cylindrica	luffa	annual	vine	herbaceous		unripe fruit		93.7	0.32	14.8333	0.594	19	0.17	0.00827225		8.08333	0.115
Momordica	charantia	bitter gourd	annual	vine	herbaceous		unripe fruit		93.65	1.03923	19.6154	0.563077	17	0.246364	0.0134048	72	63.2308	1.05429
Phaseolus	coccineus	runner bean	P/A	vine	herbaceous		unripe fruit		58	1.9182	49.9983	2.5854			0.00283333		26.9799
Phaseolus	vulgaris	common bean	annual	vine	herbaceous		unripe fruit		90.4967	2.43333	41.3333	0.99	28	0.24	0.0224667	35	15.8333	0.41
Physalis	ixocarpa	tomatillo	annual	herb	forb		fruit		90.315	1.9	13.5	1.21	50.5	0.22	0.0095	7	10.85	0.38
Pisum	sativum	pea	annual	herb	forb		unripe fruit		88.245	2.2	46.5	1.69	24	0.27	0.0373	42	56	0.39
Psophocarpus	tetragonobolus	winged bean	P/A	vine	herbaceous		unripe fruit		90	1.5815	63.251	1.33737	34	0.53	0.0224667		17.5
Raphanus	sativus	radish pod	annual	herb	forb		unripe fruit		90.5	1.4	80	2.8			0.0025		69
Solanum	aethiopicum	African eggplant	A/P	herb	forb		fruit		90.8	1.51659	18.9288	1.171		0.2	0.0334308	21.8182	10.8614	0.868182
Solanum	lycopersicon	tomato	A/P	herb	forb		fruit		94.316	0.563529	12.8235	0.60875	11.25	0.203333	0.0599443	16.8	20.6882	1.47462
Solanum	macrocarpon	gboma eggplant	A/P	herb	forb		fruit		89	1.4732	14.167	0.653333	40	0.25	0.0285	23	16.6667	0.62
Solanum	melongena	eggplant	A/P	herb	forb		fruit		92.1667	1.17875	14.5	0.758571	15	0.204	0.000914594	13.5	5.65	0.105
Solanum	pimpinellifolium	currant tomato	A/P	herb	forb		fruit		93.2	0.4	29	1.7			0.1		50
Trichosanthes	cucumerina	snake gourd	annual	vine	herbaceous		unripe fruit		93.6	0.8475	22	0.46			0.00944458	15	7.25	0.04
Vicia	faba	fava bean	annual	herb	forb		unripe fruit		72.6	7.5	37	1.55	33	1	0.00665	148	3.7	1.16
Vigna	unguiculata	cowpea, yardlong bean	annual	vine	herbaceous		unripe fruit		86.75	1.7	60	1.054	51.6	0.336667	0.05834	56	26.16	0.49
Annuals with edible unripe seeds																				Annuals with edible unripe seeds
Canavalia	ensiformis	jack bean	annual	vine	herbaceous		unripe seed		85.6667	2.2973	50.9996	1.73133			0.00229125		31.992			total cells	90
Glycine	max	edamame soybean	annual	herb	forb		unripe seed		67.5	2.37333	113.333	3.46333	65	1.235	0.0142557	132.5	30.6667	6.46		total blank	14
Lablab	purpureus	lablab bean	A/P	vine	herbaceous		unripe seed		87.885	3.3	50	0.97	40	0.37	0.003775	62	12.9	0.51		total cells with data	76
Phaseolus	coccineus	runner bean	P/A	vine	herbaceous		unripe seed		34.1	12.1865	60.9983	4.0898			0.0025		0			total XH	3
Phaseolus	lunatus	Lima bean	P/A	vine	herbaceous		unripe seed		66.7567	2.80285	50.4974	2.89138	54.5	0.78	0.0152733	34	24.2128	0.32		total VH	8
Pisum	sativum	pea	annual	herb	forb		unripe seed		74.6	2.2	30	1.8	35		0.039		33			% XH or VH	0.144737
Psophocarpus	tetragonobolus	winged bean	P/A	vine	herbaceous		unripe seed		89.52	1.7004	84	1.5	34	0.39	0.0064	66	18.3
Vicia	faba	fava bean	annual	herb	forb		unripe seed		78.2	3.65	26	2	38	0.58	0.0175	96	33
Vigna	unguiculata	cowpea	annual	vine	herbaceous		unripe seed		73.7333	3.93333	93.6667	1.43333	51	1.005	0.0197	168	11.3333
Zea	mays	sweet corn	annual	herb	grasslike		unripe seed		75.77	1.81667	13	0.713333	39.6667	0.455	0.005825	21.0275	8.53333	0.07

## Sheet: Summary by Plant Form
Summary by Plant Form
	woody	perennial vines	herbaceous perennials	annuals
leaves	0.447826	0.270833	0.235593	0.19958
shoots	0.137255	n/a	0.0674157	n/a
flowers & flowerbuds	0.210526	0	0.142857	0.0666667
fruit, ripe and unripe	0.164062	0.171429	0	0.0289855
unripe seeds	0.25	0.121212	n/a	0.144737
	leaves	shoots	flowers & flowerbuds	fruit	unripe seeds
woody plants	0.447826	0.137255	0.210526	0.164062	0.25
perennial vines	0.270833		0	0.171429	0.121212
herbaceous perennials	0.235593	0.0674157	0.142857	0
annuals	0.19958		0.0666667	0.0289855	0.144737

## Sheet: Meta-analysis
Perennial vegetables: A neglected resource for biodiversity, carbon sequestration, and nutrition
Eric Toensmeier, Rafter Ferguson, Mamta Mehra
Supporting materials: Nutrition data
Meta-Analysis Sheet
Genus	Species	Common Name	Life Cycle	Form	Subform	Aquatic	Part	Source	Water	Fiber	Calcium	Iron mg/100g	Magnesium	Zinc	Vitamin A	Folate (B9)	Ascorbic Acid (C) mg/100g	Tocopherol/Tocotrienol (E)
									%	%	mg/100g	mg/100g	mg/100g	mg/100g	RAE mg/100gm	micrograms (ug)/100gm	mg/100g	mg/100gm
Abelmoschus	esculentus						unripe fruit	Siemonsma & Piluek (1993)	90	1	80	3
Abelmoschus	esculentus						unripe fruit	Grubbe & Denton (2004)							0
Abelmoschus	esculentus						unripe fruit	Duke & Atchley (1986)							0
Abelmoschus	esculentus						unripe fruit	Duke & Atchley (1986)
Abelmoschus	esculentus						unripe fruit	Duke & Atchley (1986)	88.9	1	92	0.6					31
Abelmoschus	esculentus						unripe fruit	Duke & Atchley (1986)	89	0.999	91.9968	0.5994					31.0023
Abelmoschus	esculentus						unripe fruit	USDA (2019)							0
Abelmoschus	esculentus						unripe fruit	USDA (2019)	85.6	3.2	82	0.6	57	0.6		60	23	0.3
Abelmoschus	esculentus						unripe fruit	World Vegetable Center (2019)		0.9	46	0.72				22	33	0.43
Abelmoschus	esculentus						unripe fruit	World Vegetable Center (2019)		0.83	33	0.87				23	24	0.27
Abelmoschus	esculentus						unripe fruit	World Vegetable Center (2019)		0.76	112	0.6		0.41		26	26	0.51
Abelmoschus	esculentus						unripe fruit	World Vegetable Center (2019)		0.86	49	1.75				27	44	0.45
Abelmoschus	esculentus						unripe fruit	World Vegetable Center (2019)		0.88	64	0.97				32	40	0.45
Abelmoschus	esculentus						unripe fruit	World Vegetable Center (2019)		0.87	38	0.69				42	36	0.61
Abelmoschus	esculentus						unripe fruit	World Vegetable Center (2019)		0.82	32	0.69				46	43	0.55
Abelmoschus	esculentus						unripe fruit	World Vegetable Center (2019)
Abelmoschus	esculentus						unripe fruit	World Vegetable Center (2019)
Abelmoschus	esculentus						unripe fruit	World Vegetable Center (2019)
Abelmoschus	esculentus						unripe fruit	World Vegetable Center (2019)
Abelmoschus	esculentus						unripe fruit	World Vegetable Center (2019)
Abelmoschus	esculentus						unripe fruit	World Vegetable Center (2019)
Abelmoschus	esculentus						unripe fruit	World Vegetable Center (2019)
Abelmoschus	esculentus						unripe fruit	World Vegetable Center (2019)
Abelmoschus	esculentus						unripe fruit	World Vegetable Center (2019)		0.79	92	0.43		0.22			11
Abelmoschus	esculentus						unripe fruit	Rubatzky & Yamaguchi (1999)							0
Abelmoschus	esculentus						unripe fruit	Rubatzky & Yamaguchi (1999)	88.9	1	89	0.9	46				30
Abelmoschus	esculentus	okra	A/P	herb/woody	shrub		unripe fruit		88.48	1.06992	69.3074	0.955338	51.5	0.41	0	34.75	31.0002	0.44625
Abelmoschus	manihot						leaf	Dignan, Burlingame, Kumar & Aalbersberg (2004)	89	3.8	268	1.9	18	1.4			26	2
Abelmoschus	manihot						leaf	Siemonsma & Piluek (1993)							0
Abelmoschus	manihot						leaf	Siemonsma & Piluek (1993)	90	1	580						118
Abelmoschus	manihot						leaf	World Vegetable Center (2019)
Abelmoschus	manihot						leaf	World Vegetable Center (2019)		1.41	176	1.39					82	4.51
Abelmoschus	manihot						leaf	Rubatzky & Yamaguchi (1999)	90	1	580	3			0		118
Abelmoschus	manihot						leaf	Rubatzky & Yamaguchi (1999)
Abelmoschus	manihot	edible hibiscus	perennial	woody	shrub		leaf		89.6667	1.8025	401	2.09667	18	1.4	0		86	3.255
Acacia	coriacea						unripe seed	Brand & Cherikoff (1985)	56.8	3.3	137	3.2	75
Acacia	coriacea	gunandru	perennial	woody	tree		unripe seed		56.8	3.3	137	3.2	75
Acacia	pennata						leaf	Institute of Nutrition (nd)	82.4	3.9	41	2.5		0.5			47
Acacia	pennata	garlic acacia	perennial	woody	tree		leaf		82.4	3.9	41	2.5		0.5			47
Acanthosicyos	naudianus						fruit	Grubbe & Denton (2004)				4
Acanthosicyos	naudianus	gemsbok cucumber	perennial	vine	herbaceous		fruit					4
Acmella	oleracea						leaf	Wu, Rauanheimo, Huang, Narayana & Polacchi (1972)	89		162	4					20
Acmella	oleracea						leaf	Siemonsma & Piluek (1993)	93						0
Acmella	oleracea						leaf	Siemonsma & Piluek (1993)
Acmella	oleracea						leaf	Siemonsma & Piluek (1993)	89		162						20
Acmella	oleracea	spilanthes	perennial	herb	forb		leaf		90.3333		162	4			0		20
Adansonia	digitata						leaf	Smith, Thiam & Burlingame (2010)							0
Adansonia	digitata						leaf	Smith, Thiam & Burlingame (2010)	78.3	2.5	313	2.6	26	0.8			52	3.5
Adansonia	digitata						leaf	Grubbe & Denton (2004)	77	2.8	402	1					52
Adansonia	digitata						leaf	World Vegetable Center (2019)		1.43	247	2.3		1.11		12	80	3.7
Adansonia	digitata						leaf	World Vegetable Center (2019)		2.39	406	2.02		0.66		34	28	7.38
Adansonia	digitata						leaf	World Vegetable Center (2019)		1.61	197	2.45				49	87	3.29
Adansonia	digitata						leaf	World Vegetable Center (2019)		2.12	232	1.55		0.84		52	65	3.46
Adansonia	digitata						leaf	World Vegetable Center (2019)		1.94	355	1.4					99
Adansonia	digitata						leaf	World Vegetable Center (2019)		1.16	227	1.35					29	2.75
Adansonia	digitata						leaf	World Vegetable Center (2019)
Adansonia	digitata						leaf	World Vegetable Center (2019)
Adansonia	digitata						leaf	World Vegetable Center (2019)
Adansonia	digitata						leaf	World Vegetable Center (2019)
Adansonia	digitata						leaf	World Vegetable Center (2019)
Adansonia	digitata						leaf	World Vegetable Center (2019)
Adansonia	digitata	baobab	perennial	woody	tree		leaf		77.65	1.99375	297.375	1.83375	26	0.8525	0	36.75	61.5	4.01333
Aegopodium	podagraria						leaves	Souci, Fachmann & Kraut (2008)	82.2		132	2.9	35	1			142
Aegopodium	podagraria	goutweed	perennial	herb	forb		leaves		82.2		132	2.9	35	1			142
Allium	ampeloprasum						leaf	de Cortes Sanchez-Mata & Tardio (2016)	78.3	4.23	75.6	0.54	17.1	0.752		145	6.69	0.05
Allium	ampeloprasum						leaf	Siemonsma & Piluek (1993)
Allium	ampeloprasum						leaf	Siemonsma & Piluek (1993)	90		60	0.8					0.03
Allium	ampeloprasum						leaf	Duke & Atchley (1986)	89	0.9964	58.0032	2.703			0		32.0014
Allium	ampeloprasum						leaf	Duke & Atchley (1986)
Allium	ampeloprasum						leaf	Duke & Atchley (1986)
Allium	ampeloprasum						leaf	Duke & Atchley (1986)	85	1.2994	52.0052	1.095			0		16.9944
Allium	ampeloprasum						leaf	USDA (2019)	83	1.8	59	2.1	28	0.12			12
Allium	ampeloprasum						leaf	USDA (2019)							0
Allium	ampeloprasum						leaf	Rubatzky & Yamaguchi (1999)	83	1.4	55	1.9	25		0		15
Allium	ampeloprasum						leaf	Rubatzky & Yamaguchi (1999)
Allium	ampeloprasum	leek	A/P	herb	forb		leaf		84.7167	1.94516	59.9347	1.523	23.3667	0.436	0	145	13.786	0.05
Allium	ampeloprasum						leaf	FAO (1982)	82.6	1.4	117		36				18
Allium	ampeloprasum	kurrat leek	perennial	herb	forb		leaf		82.6	1.4	117		36				18
Allium	chinense						leaf	Wijaya & Epriliata (2013)			91	3			0		39
Allium	chinense	rakkyo	A/P	herb	forb		leaf				91	3			0		39
Allium	fistulosum						leaf	Siemonsma & Piluek (1993)							0
Allium	fistulosum						leaf	Siemonsma & Piluek (1993)	92		80						33
Allium	fistulosum						leaf	USDA (2019)	90.5	2.4	18	1.2	23	0.5	0	16	27
Allium	fistulosum						leaf	USDA (2019)
Allium	fistulosum						leaf	World Vegetable Center (2019)		0.81	130	3.35		0.58			39	0.29
Allium	fistulosum						leaf	World Vegetable Center (2019)		0.78	66	1.59		0.19			32	0.13
Allium	fistulosum						leaf	World Vegetable Center (2019)		0.81	45	0.89		0.28			29	0.28
Allium	fistulosum						leaf	World Vegetable Center (2019)
Allium	fistulosum						leaf	World Vegetable Center (2019)
Allium	fistulosum						leaf	World Vegetable Center (2019)
Allium	fistulosum						leaf	World Vegetable Center (2019)
Allium	fistulosum						leaf	World Vegetable Center (2019)		0.7	102	0.75		0.16			29	0.2
Allium	fistulosum						leaf	Rubatzky & Yamaguchi (1999)	90.5	1	55	1			0		27
Allium	fistulosum						leaf	Rubatzky & Yamaguchi (1999)
Allium	fistulosum	Welsh onion	A/P	herb	forb		leaf		91	1.08333	70.8571	1.46333	23	0.342	0	16	30.8571	0.225
Allium	hookeri				forb		leaf	Loukrapah, Rajendram, Chyne & Longvan (2019)	39.9	0.96	41.7	2.08	50.8	0.49		177	0.71	0.37
Allium	hookeri	napakpi	perennial	herb	forb		leaf		39.9	0.96	41.7	2.08	50.8	0.49	0	177	0.71	0.37
Allium	tuberosum						leaf	Siemonsma & Piluek (1993)
Allium	tuberosum						leaf	Siemonsma & Piluek (1993)	93	0.9							25
Allium	tuberosum						leaf	World Vegetable Center (2019)		1.03	84	2.72		0.48			24
Allium	tuberosum						leaf	World Vegetable Center (2019)		1.03	75	2.06		0.29			33
Allium	tuberosum						leaf	World Vegetable Center (2019)		1.19	36	1.35		0.2			21	2.71
Allium	tuberosum						leaf	Loukrapah, Rajendram, Chyne & Longvan (2019)	90.5	2.03	70.7	1.33	83.8	0.25		96.2	1.05	1.82
Allium	tuberosum						leaf	World Vegetable Center (2019)		0.97	97.8	1.16		0.22			46	2.18
Allium	tuberosum						leaf	World Vegetable Center (2019)		1.1	52	0.6		0.31			16	1.81
Allium	tuberosum						leaf	Yang, Wang & Pan (2009)	93.2	1.2	25	1.7	12	0.33	0		15	0.34
Allium	tuberosum						leaf	Watanabe & Kawai (2018)	91.4	2.8	22	0.5	15	0.3		120	23	0.1
Allium	tuberosum						leaf	World Vegetable Center (2019)
Allium	tuberosum						leaf	World Vegetable Center (2019)
Allium	tuberosum						leaf	World Vegetable Center (2019)
Allium	tuberosum						leaf	World Vegetable Center (2019)
Allium	tuberosum						leaf	World Vegetable Center (2019)
Allium	tuberosum						leaf	Rubatzky & Yamaguchi (1999)							0
Allium	tuberosum						leaf	Rubatzky & Yamaguchi (1999)	93.1	0.9	50	0.6					25
Allium	tuberosum	garlic chives	perennial	herb	forb		leaf		92.24	1.315	56.9444	1.33556	36.9333	0.2975	0	108.1	22.905	1.49333
Allium	tricoccum						leaf	Kuhnlein & Turner (1991)									16.7
Allium	tricoccum	ramps	perennial	herb	forb		leaf										16.7
Allium	tuberosum						flowerstalk	Yang, Wang & Pan (2009)	93.2	1.2	25	1.7	12	0.33	0		15	0.34
Allium	tuberosum						flowerstalk	Watanabe & Kawai (2018)	91.4	2.8	22	0.5	15	0.3		120	23	0.1
Allium	tuberosum	garlic chives	perennial	herb	forb		flowerstalk		91.4	2	23.5	1.1	13.5	0.315	0	120	19	0.22
Allium	tuberosum						leaf, blanched	Yang, Wang & Pan (2009)	89.4	1.9	11	4.2	22	1.34	0		1	0.96
Allium	tuberosum						leaf, blanched	Watanabe & Kawai (2018)	94	2	15	0.7	11	0.2		76	15	0.3
Allium	tuberosum	garlic chives	perennial	herb	forb		leaf, blanched		94	1.95	13	2.45	16.5	0.77	0	76	8	0.63
Allium	ursinum						leaves	Souci, Fachmann & Kraut (2008)	89.4	2.18	76	2.9	22	0.27			150
Allium	ursinum	ramsons	perennial	herb	forb		leaves		89.4	2.18	76	2.9	22	0.27			150
Alternanthera	sessilis						leaf	Longvah, Anantan, Bhaskarachary & Venkaiah (2017)	77.76	6.74	388	3.88	80.9	0.99		48.42	103	0.54
Alternanthera	sessilis						leaf	Grubbe & Denton (2004)	80	2.1	146	0.6
Alternanthera	sessilis						leaf	Duke & Atchley (1986)	80	2.0988	146.005
Alternanthera	sessilis	sessile joyweed	perennial	herb	forb	aquatic	leaf		79.2533	3.64627	226.668	2.24	80.9	0.99		48.42	103	0.54
Amaranthus	cruentus						leaf	Grubbe & Denton (2004)							0
Amaranthus	cruentus						leaf	Grubbe & Denton (2004)	84	1.8	410	8.9				85	64
Amaranthus	cruentus						leaf	Grubbe & Denton (2004)
Amaranthus	cruentus						leaf	World Vegetable Center (2019)		1.17	305	3.79		0.66		52	36	1.08
Amaranthus	cruentus						leaf	World Vegetable Center (2019)		1.78	264	2.66		2.93		71	81	4.28
Amaranthus	cruentus						leaf	World Vegetable Center (2019)
Amaranthus	cruentus						leaf	World Vegetable Center (2019)
Amaranthus	cruentus	amaranth	annual	herb	forb		leaf		84	1.58333	326.333	5.11667		1.795	0	69.3333	60.3333	2.68
Amaranthus	dubious						leaf	Grubbe & Denton (2004)
Amaranthus	dubious						leaf	World Vegetable Center (2019)		1.36	265	1.64		2.96		50	97
Amaranthus	dubious						leaf	World Vegetable Center (2019)		1.51	293	3.53		4.28		60	100	5.33
Amaranthus	dubious						leaf	World Vegetable Center (2019)
Amaranthus	dubious						leaf	World Vegetable Center (2019)
Amaranthus	dubious						leaf	World Vegetable Center (2019)		1.01	582	3.35		1.48		82	78	2.88
Amaranthus	dubious	amaranth	annual	herb	forb		leaf			1.29333	380	2.84		2.90667		64	91.6667	4.105
Amaranthus	hypochondriacus						leaf	World Vegetable Center (2019)		1.41	266	3.48		4.32		52	117
Amaranthus	hypochondriacus						leaf	World Vegetable Center (2019)		1.67	291	1.93		3.6		55	73
Amaranthus	hypochondriacus						leaf	World Vegetable Center (2019)		1.58	269	1.76		3.27		59	93
Amaranthus	hypochondriacus						leaf	World Vegetable Center (2019)		1.7	281	1.88		3.35		66	92
Amaranthus	hypochondriacus						leaf	World Vegetable Center (2019)		1.54	194	2.45		3.2		108	69	1.87
Amaranthus	hypochondriacus	amaranth	annual	herb	forb		leaf			1.58	260.2	2.3		3.548		68	88.8	1.87
Amaranthus	retroflexus						leaf	World Vegetable Center (2019)		1.09	630	3.14		1.05		67	63	2.5
Amaranthus	retroflexus	amaranth	annual	herb	forb		leaf			1.09	630	3.14		1.05		67	63	2.5
Amaranthus	spp.						leaf	USDA (2019)	91.7		215	2.3	55	0.9	0	85
Amaranthus	spp.	amaranth	annual	herb	forb		leaf		91.7		215	2.3	55	0.9	0	85
Amaranthus	tricolor		annual	herb			leaf	World Vegetable Center (2019)		1.23	322	1.89		0.69		188	106	1.43
Amaranthus	tricolor						leaf	World Vegetable Center (2019)		1.23	322	1.89		0.69		188	106	1.43
Amaranthus	tricolor						leaf	World Vegetable Center (2019)		0.94	317	7.71		1.5			59	0.9
Amaranthus	tricolor						leaf	World Vegetable Center (2019)		0.97	282	6.75		0.37
Amaranthus	tricolor						leaf	World Vegetable Center (2019)		0.83	254	4.49		0.39			37
Amaranthus	tricolor						leaf	World Vegetable Center (2019)		0.76	278.5	2.88		0.4			33	0.87
Amaranthus	tricolor						leaf	World Vegetable Center (2019)		1.04	130	1.06		1.61			60	0.87
Amaranthus	tricolor						leaf	World Vegetable Center (2019)
Amaranthus	tricolor	amaranth	annual	herb	forb		leaf			1	272.214	3.81		0.807143		188	66.8333	1.1
Angelica	keiskei						leaf	Watanabe & Kawai (2018)	88.6	5.6	65	1	26	0.6		100	41	4.3
Angelica	keiskei						leaf	World Vegetable Center (2019)		1.56	63	1.73				33	36	0.5
Angelica	keiskei						leaf	World Vegetable Center (2019)		1.09	532	1.73		1.15		73	105	12.8
Angelica	keiskei						leaf	World Vegetable Center (2019)		1.09	532	1.73		1.15		73	105	12.79
Angelica	keiskei	asitaba	A/P	herb	forb		leaf		88.6	2.335	298	1.5475	26	0.966667		69.75	71.75	7.5975
Anredera	cordifolia						leaf	World Vegetable Center (2019)		0.46	153	1.26				14	36	6.09
Anredera	cordifolia						leaf	World Vegetable Center (2019)
Anredera	cordifolia	Madeira vine	perennial	vine	herbaceous		leaf			0.46	153	1.26				14	36	6.09
Apium	graveolens						petiole	Rubatzky & Yamaguchi (1999)	94.7	0.65	52	0.4	17		0		8
Apium	graveolens						petiole	USDA (2019)	95.4	1.6	40	0.2	11	0.13	0	36	3.1
Apium	graveolens	celery	annual	herb	forb		petiole		95.05	1.125	46	0.3	14	0.13	0	36	5.55
Aralia	cordata						leaf	Duke & Atchley (1986)	95	0.4982	13.0002	0.3008					5.0008
Aralia	cordata						leaf	Watanabe & Kawai (2018)	94.4	1.4	7	0.2	9	0.1		19	4	0.2
Aralia	cordata						leaf	Rubatzky & Yamaguchi (1999)	95.3	0.5	13	0.3					5
Aralia	cordata	udo	perennial	herb	forb		leaf		94.9	0.7994	11.0001	0.266933	9	0.1		19	4.66693	0.2
Aralia	elata						leaf	Wu, Rauanheimo, Huang, Narayana & Polacchi (1972)	84	2.2	81	7.4
Aralia	elata						leaf	Duke & Atchley (1986)	84	2.208	81.008	7.408					10
Aralia	elata						leaf	Watanabe & Kawai (2018)	90.2	4.2	1	0.9	33	0.8		160	7	4.3
Aralia	elata	angelica tree	perennial	woody	tree		leaf		86.0667	2.86933	54.336	5.236	33	0.8		160	8.5	4.3
Artemisia	lactiflora						leaf	Duke & Atchley (1986)	88	1.4042	45.0058	2.2015			0		35.9975
Artemisia	lactiflora						leaf	World Vegetable Center (2019)		1.22	172	2.07		0.24			20
Artemisia	lactiflora						leaf	World Vegetable Center (2019)		1.06	95	1.84
Artemisia	lactiflora	white mugwort	perennial	herb	forb		leaf		88	1.22807	104.002	2.03717		0.24	0		27.9987
Artemisia	princeps						leaf	World Vegetable Center (2019)		3	230	3.2		0.3			44
Artemisia	princeps	Korean mugwort	perennial	herb	forb		leaf			3	230	3.2		0.3			44
Asclepias	syriaca						leaves	Kuhnlein & Turner (1991)	80		437	6.3			0		391
Asclepias	syriaca	milkweed	perennial	herb	forb		leaves		80		437	6.3			0		391
Asparagus	officinalis						leaf	Souci, Fachmann & Kraut (2008)	93.1	1.27	26	0.675	17	0.396				2
Asparagus	officinalis						leaf	Siemonsma & Piluek (1993)	92		24	1.2			0	108	20
Asparagus	officinalis						leaf	Duke & Atchley (1986)	93	0.8979	16.0016	1.4016			0		20.002
Asparagus	officinalis						leaf	Duke & Atchley (1986)	93	0.7	24.997	1.001			0		39.998
Asparagus	officinalis						leaf	Duke & Atchley (1986)	91.7	0.7	22	1			0		33
Asparagus	officinalis						leaf	Duke & Atchley (1986)	92	0.6972	22.0033	0.996			0		33.0008
Asparagus	officinalis						leaf	Duke & Atchley (1986)	92	0.8036	25.0018	0.902					10.004
Asparagus	officinalis						leaf	Kuhnlein & Turner (1991)	92	0.7	22	0.8			0		29
Asparagus	officinalis						leaf	USDA (2019)	93.2	2.1	24	2.4	14	0.54	0	52	5.6	1.13
Asparagus	officinalis						leaf	Rubatzky & Yamaguchi (1999)	92.2	0.77	22	0.8	18		0		33
Asparagus	officinalis	asparagus	perennial	herb	forb		leaf		92.42	0.959856	22.8004	1.11756	16.3333	0.468	0	80	24.845	1.565
Asplenium	nidus						leaf	Englberger, Aalbersberg, Ravi, Bonnin, Marks, Fitzgerald & Elymore (2003)							0
Asplenium	nidus						leaf	World Vegetable Center (2019)		0.94	45	0.68		0.39	0		67
Asplenium	nidus	birds nest fern	perennial	herb	fern		leaf			0.94	45	0.68		0.39	0		67
Asystasia	gangetica						leaf	World Vegetable Center (2019)		1.36	145	2.28			0	27	47	2.98
Asystasia	gangetica						leaf	World Vegetable Center (2019)		1.36	145	2.28			0	27	47
Asystasia	gangetica						leaf	World Vegetable Center (2019)		1.47	165	1.82		0.29	0		19
Asystasia	gangetica	tropical violet	perennial	herb	forb		leaf			1.39667	151.667	2.12667		0.29	0	27	37.6667	2.98
Atriplex	halimus						leaf	"Seasonal Composition of Leaves of Three Atriplex halimus Natural Populations Grown in a Common Garden"	0.6	3.88	684	8.7	428
Atriplex	halimus						leaf	"Seasonal Composition of Leaves of Three Atriplex halimus Natural Populations Grown in a Common Garden"	0.6	7.6	1140	28.5	792
Atriplex	halimus	saltbush	perennial	woody	shrub		leaf		0.6	5.74	912	18.6	610
Atriplex	hortensis						leaf	World Vegetable Center (2019)		0.72	158	1.24		0.35	0	172	44	3.11
Atriplex	hortensis	orach	annual	herb	forb		leaf			0.72	158	1.24		0.35	0	172	44	3.11
Averrhoa	bilimbi						fruit	Edible Medicinal and Non-Medicinal Plants Volume 1	94.2	0.6	3.4	1.01			0.035		15.5
Averrhoa	bilimbi						fruit	Edible Medicinal and Non-Medicinal Plants Volume 1	94.7
Averrhoa	bilimbi						fruit	Edible Medicinal and Non-Medicinal Plants Volume 1	94.2	0.7	12	0.4			0.038		15.7
Averrhoa	bilimbi	bilimbi	perennial	woody	tree		fruit		94.3667	0.65	7.7	0.705			0.0365		15.6
Bactris	gasipaes						leaf	"Hearts of Palm (Bactris, Euterpe and others)"	90.47	0.89	114	4.3	80	0.79			14
Bactris	gasipaes						leaf	"Hearts of Palm (Bactris, Euterpe and others)"	88.4	1.05							3.2
Bactris	gasipaes						leaf	Encyclopedia of Fruits and Nuts		0.9	42.4	0.23	3.4				3.2
Bactris	gasipaes						leaf	Rubatzky & Yamaguchi (1999)	89.8	0.8	86	0.7	9				17
Bactris	gasipaes	peach palm	perennial	woody	palm		leaf		89.5567	0.91	80.8	1.74333	30.8	0.79			9.35
Bactris	gasipaes						fruit	Leterme, Bildgen, Estrada & Londono (2006)	53.9		45	2.23	29	0.25
Bactris	gasipaes						fruit	Leterme, Bildgen, Estrada & Londono (2006)	53.8		44	2.65	28	0.29
Bactris	gasipaes						fruit	Leterme, Bildgen, Estrada & Londono (2006)	67.9		47	0.8	28	0.34
Bactris	gasipaes						fruit	Leterme, Bildgen, Estrada & Londono (2006)	58		29	1.1	20	0.38
Bactris	gasipaes						fruit	Encyclopedia of Fruits and Nuts		2	18.9	0.59	17.1		0		18.7
Bactris	gasipaes						fruit	Encyclopedia of Fruits and Nuts	52.6	3.2
Bactris	gasipaes						fruit	Encyclopedia of Fruits and Nuts	45	3.8
Bactris	gasipaes						fruit	Encyclopedia of Fruits and Nuts	54.4	8.4
Bactris	gasipaes						fruit	Encyclopedia of Fruits and Nuts	42.7	9.3
Bactris	gasipaes	peach palm	perennial	woody	palm		fruit		53.5375	5.34	36.78	1.474	24.42	0.315	0		18.7
Balanites	aegyptiaca						leaf	feedipedia	33.7	6.76	106.08
Balanites	aegyptiaca	balanites	perennial	woody	tree		leaf		33.7	6.76	106.08
Bambusa	balcooa						shoot	Nutritional potential of five unexplored wild edible plants consumed by the tribal people of Arunachal Pradesh state in India	71.22	0.96	13.1	0.21	0.52	0.97
Bambusa	balcooa	bamboo	perennial	woody	bamboo		shoot		71.22	0.96	13.1	0.21	0.52	0.97
Bambusa	bambos						shoot	Nutritional properties of bamboo shoots	89.83	3.54							1.9	0.61
Bambusa	bambos						shoot	Duke Handbook of Energy Crops	90.7	0.5	33	0.4			0		4
Bambusa	bambos	bamboo	perennial	woody	bamboo		shoot		90.265	2.02	33	0.4			0		2.95	0.61
Bambusa	nutans						shoot	Nutritional properties of bamboo shoots	92	2.28							2.6	0.47
Bambusa	nutans	bamboo	perennial	woody	bamboo		shoot		92	2.28							2.6	0.47
Bambusa	polymorpha						shoot	Guerrero Wild Edible Plans			560		140
Bambusa	polymorpha						shoot	Nutritional properties of bamboo shoots	90.26	3.81							2.6	0.49
Bambusa	polymorpha	bamboo	perennial	woody	bamboo		shoot		90.26	3.81	560		140				2.6	0.49
Bambusa	tulda						shoot	Nutritional properties of bamboo shoots	83.6	3.97	4.06	2.69	6.09	0.7			1.42	0.61
Bambusa	tulda	bamboo	perennial	woody	bamboo		shoot		83.6	3.97	4.06	2.69	6.09	0.7			1.42	0.61
Bambusa	vulgaris						shoot	Souci, Fachmann & Kraut (2008)	91		15	0.7					6.5
Bambusa	vulgaris						shoot	Nutritional properties of bamboo shoots	90.6	4.24							4.8	0.52
Bambusa	vulgaris						shoot	Guerrero Wild Edible Plans	77		320		100				13.7
Bambusa	vulgaris						shoot	Longvah, Anantan, Bhaskarachary & Venkaiah (2017)	94.5	1.55	10	0.33	8.28	0.37		17.05	15.74	0.06
Bambusa	vulgaris	bamboo	perennial	woody	bamboo		shoot		88.275	2.895	115	0.515	54.14	0.37		17.05	10.185	0.29
Bambusa	spp						shoot	Institute of Nutrition (nd)	91.2	5.7	24	1					5
Bambusa	spp.						leaf	Duke & Atchley (1986)	92	1.9	6.9996	1.0032			0
Bambusa	spp.						leaf	Duke & Atchley (1986)	90	0.9048	10.0048	0.6032			0		10.0048
Bambusa	spp.						leaf	Duke & Atchley (1986)	91	0.702	12.996	0.504			0		3.996
Bambusa	spp.						leaf	Duke & Atchley (1986)	89	0.7006	32.996	0.2034					8.9948
Bambusa	spp						leaf	Rubatzky & Yamaguchi (1999)	91	0.7	13	0.5	3		0		4
Bambusa	spp.	bamboo	perennial	woody	bamboo		leaf		90.7	1.7679	16.6661	0.635633	3		0		6.39912
Barbarea	vulgaris						flowerbud	Kallas Edible Wild Plants			163				0.101		141
Barbarea	vulgaris						flowerbud	Souci, Fachmann & Kraut (2008)	82.5		156	2.3					314
Barbarea	vulgaris	wintercress	A/P	herb	forb		flowerbud		82.5		159.5	2.3			0.101		227.5
Barbarea	verna						leaf	Rubatzky & Yamaguchi (1999)	90	1	80	1			0		70
Barbarea	verna	winter cress	annual	herb	forb		leaf		90	1	80	1			0		70
Basella	alba						leaf	Kennedy (2011)				1.5	48		0	140
Basella	alba						leaf	Wijaya & Epriliata (2013)				3.1			0		166
Basella	alba						leaf	Wijaya & Epriliata (2013)	91			1.2					29
Basella	alba						leaf	Siemonsma & Piluek (1993)	91	1.3	16	3.1			0		29
Basella	alba						leaf	Siemonsma & Piluek (1993)	91	1.3	117				0		166
Basella	alba						leaf	Duke & Atchley (1986)	93	0.5676	326.231	3.6762			0		65.0562
Basella	alba						leaf	Duke & Atchley (1986)	93	0.637	112.427	1.694			0		91.21
Basella	alba						leaf	Duke & Atchley (1986)	93	0.0069	109.013	1.2006			0		102.003
Basella	alba						leaf	USDA (2019)	93.1		109	1.2	65	0.43	0	140	102
Basella	alba						leaf	World Vegetable Center (2019)		0.73	25	1.03			0	71	49	1.35
Basella	alba						leaf	World Vegetable Center (2019)		0.73	27	1.02			0	104	51	1.29
Basella	alba (green)						leaf	World Vegetable Center (2019)		0.58	79	1.29			0		49	1.46
Basella	alba (red)						leaf	World Vegetable Center (2019)		0.71	128	1.5			0		78	1.42
Basella	alba						leaf	Rubatzky & Yamaguchi (1999)	93.1	0.7	130	1.5			0		95
Basella	alba	Malabar spinach	perennial	vine	herbaceous		leaf		92.275	0.72615	107.152	1.77006	56.5	0.43	0	113.75	82.4822	1.38
Bauhinia	variegata						pods and unripe seeds	FAO (1982)	70.5	2.8	294	2.9
Bauhinia	variegata	orchid tree	perennial	woody	tree		pods and unripe seeds		70.5	2.8	294	2.9
Bellis	perennis						leaf	Ernahrung & Forsten (1979)			190	2.7	33		0
Bellis	perennis	English daisy	perennial	herb	forb		leaf				190	2.7	33		0
Benincasa	hispida						fruit	Grubbe & Denton (2004)	96.1	2.9	19	0.4	10	0.6		5	13
Benincasa	hispida						fruit	USDA (2019)	96.1	2.9	19	0.4	10	0.6	0	5	13
Benincasa	hispida						fruit	World Vegetable Center (2019)		0.36	13	0.57		0.06			18	0.03
Benincasa	hispida						fruit	World Vegetable Center (2019)		0.55	13	0.04		0.04			37	0.14
Benincasa	hispida						fruit	Rubatzky & Yamaguchi (1999)	96	0.7	22	0.5			0		39
Benincasa	hispida						fruit	Rubatzky & Yamaguchi (1999)	96		14	0.4	16				14
Benincasa	hispida	wax gourd	annual	vine	forb		fruit		96.05	1.482	16.6667	0.385	12	0.325	0	5	22.3333	0.085
Beta	vulgaris						leaf	Duke & Atchley (1986)	90.9	1.3	119	3.3			0		30
Beta	vulgaris						leaf	Duke & Atchley (1986)	91.1	0.8	88	3.2			0		32
Beta	vulgaris						leaf	USDA (2019)	92.7	1.6	51	1.8	81	0.36	0	14	30	1.89
Beta	vulgaris						leaf	USDA (2019)	91	3.7	117	2.6	70	0.4	0	15	30	1.5
Beta	vulgaris						leaf	World Vegetable Center (2019)		0.58	30	0.13		0.26	0	30	12	1.1
Beta	vulgaris						leaf	World Vegetable Center (2019)		2.17	48	0.21		0.35	0	32	16	0.6
Beta	vulgaris						leaf	World Vegetable Center (2019)							0	32	16	0.6
Beta	vulgaris						leaf	World Vegetable Center (2019)		2.19	41	0.21		0.24	0	38	20	1
Beta	vulgaris						leaf	World Vegetable Center (2019)		0.82	73	0.87			0		12	0.35
Beta	vulgaris						leaf	World Vegetable Center (2019)		0.62	72	1.33		0.29	0	67	20	0.39
Beta	vulgaris						leaf	Rubatzky & Yamaguchi (1999)	86.4	0.7	380	16.2			0		70
Beta	vulgaris						leaf	Rubatzky & Yamaguchi (1999)	92.3	1.7	121	3.3	89		0		31
Beta	vulgaris						leaf	Rubatzky & Yamaguchi (1999)	92.3	0.77	93	2.3	73		0		35
Beta	vulgaris	chard, beet greens	annual	herb	forb		leaf		90.9571	1.4125	102.75	2.95417	78.25	0.316667	0	32.5714	27.2308	0.92875
Beta	vulgaris var. maritima						leaf	Guerrero Edible Wild Plants	89	3.6	190	4	57	0.2
Beta	vulgaris var. maritima						leaf	de Cortes Sanchez-Mata & Tardio (2016)	87.3	4.38	67.1	2.88	66.9	0.875		302	36.4	0.67
Beta	vulgaris var. maritima	sea beet	perennial	herb	forb		leaf		88.15	3.99	128.55	3.44	61.95	0.5375		302	36.4	0.67
Bidens	pilosa						leaf	Kennedy (2011)							0
Bidens	pilosa						leaf	French (2006)	82								50
Bidens	pilosa						leaf	World Vegetable Center (2019)		1.11	118	1.38			0		55	1.74
Bidens	pilosa	bidens	annual	herb	forb		leaf		82	1.11	118	1.38			0		52.5	1.74
Blighia	sapida						fruit aril	Edible Medicinal and Non-Medicinal Plants Volume 6		0.99	43.3	5.37		1.24
Blighia	sapida						fruit aril	Duke & Atchley (1986)	69	1.6016	40.0092	2.7104			0		25.9952
Blighia	sapida	akee	perennial	woody	tree		fruit aril		69	1.2958	41.6546	4.0402		1.24	0		25.9952
Brasenia	schreiberi						leaf	Watanabe & Kawai (2018)	98.6	1	4	0	2	0.2		3	0	0.1
Brasenia	schreiberi	water sheild	perennial	herb	forb	aquatic	leaf		98.6	1	4	0	2	0.2		3	0	0.1
Brassica	rapa						leaf	Grubbe & Denton (2004)	94.4	1.2	77	0.31	13	0.2	0	66	45
Brassica	rapa						leaf	USDA (2019)	89.7	3.2	190	1.1	31	0.19	0	194	60	2.86
Brassica	rapa						leaf	USDA (2019)	95.3	1	105	0.8	19	0.19	0	66	45	0.09
Brassica	rapa						leaf	World Vegetable Center (2019)		0.65	171	2.86		0.25	0		59	1.02
Brassica	rapa						leaf	World Vegetable Center (2019)		0.78	245	2.74		0.21	0		65	1.01
Brassica	rapa						leaf	World Vegetable Center (2019)		0.63	197	2.65		0.23	0		88	0.42
Brassica	rapa						leaf	World Vegetable Center (2019)		0.7	99	2.19		0.25	0		63	1.29
Brassica	rapa						leaf	World Vegetable Center (2019)		0.64	228	0.97		0.15	0		52	0.73
Brassica	rapa						leaf	World Vegetable Center (2019)		0.63	193	0.89		0.23	0		41	0.8
Brassica	rapa						leaf	World Vegetable Center (2019)		0.47	182	0.86		0.15	0		96	0.79
Brassica	rapa						leaf	World Vegetable Center (2019)		0.47	153	0.78		0.21	0		57	0.86
Brassica	rapa						leaf	World Vegetable Center (2019)		0.49	69	0.69		0.16	0
Brassica	rapa						leaf	World Vegetable Center (2019)		0.81	205	1.74		0.29	0	28	50	1.51
Brassica	rapa						leaf	World Vegetable Center (2019)		0.75	82	1.02		0.62	0	46	74	1.35
Brassica	rapa						leaf	World Vegetable Center (2019)		0.65	98	0.76		0.38	0	51	77	1.25
Brassica	rapa						leaf	World Vegetable Center (2019)		0.63	84	0.74		0.28	0	66	74	0.87
Brassica	rapa						leaf	World Vegetable Center (2019)		0.68	106	0.9		0.19	0		44	0.78
Brassica	rapa						leaf	World Vegetable Center (2019)		0.47	148	0.66		0.18	0		36	0.2
Brassica	rapa						leaf	World Vegetable Center (2019)		0.7	201	2.9		0.18	0		56	1.25
Brassica	rapa						leaf	World Vegetable Center (2019)		0.59	187	2.55		0.23	0		51
Brassica	rapa						leaf	World Vegetable Center (2019)		0.65	196	2.41		0.27	0		72	1
Brassica	rapa						leaf	World Vegetable Center (2019)		0.42	45.8	0.92		0.24	0		35
Brassica	rapa						leaf	World Vegetable Center (2019)		0.41	52	0.47		0.17	0		20	0.12
Brassica	rapa						leaf	World Vegetable Center (2019)		0.41	103	0.46		0.19	0		16	0.05
Brassica	rapa						leaf	World Vegetable Center (2019)		0.44	42	0.31		0.21	0		29
Brassica	rapa						leaf	World Vegetable Center (2019)		0.57	157	2.11		0.31	0		82	0.29
Brassica	rapa						leaf	World Vegetable Center (2019)		0.54	126	0.94		0.25	0		50	0.78
Brassica	rapa						leaf	World Vegetable Center (2019)		0.41	153	0.84		0.21	0		35	0.53
Brassica	rapa						leaf	World Vegetable Center (2019)		0.41	172	0.67		0.16	0		34	0.87
Brassica	rapa						leaf	World Vegetable Center (2019)		0.65	81	0.62		0.21	0		42	1.16
Brassica	rapa						leaf	World Vegetable Center (2019)		0.35	35	0.07		0.13	0		28	0.11
Brassica	rapa						leaf	Rubatzky & Yamaguchi (1999)	90.5	0.8	224	1.5	45		0		93
Brassica	rapa						leaf	Rubatzky & Yamaguchi (1999)	95	0.57	71	0.6	13		0		25
Brassica	rapa						leaf	Rubatzky & Yamaguchi (1999)	95		102	2	27		0		53
Brassica	rapa						leaf	Rubatzky & Yamaguchi (1999)	92.2	1	210	1.5			0		130
Brassica	rapa						leaf	Rubatzky & Yamaguchi (1999)	93.8	0.67	118	0.8	19		0		57
Brassica	rapa	Chinese cabbage, pak choi, (& turnip greens)	annual	herb	forb		leaf		93.2375	0.698286	136.328	1.23139	23.8571	0.229677	0	73.8571	55.2571	0.845769
Brassica	rapa						flowerbud	USDA (2019)	92.5	2.7	108	2.1	22	0.77	0	83	20.2
Brassica	rapa						flowerbud	Rubatzky & Yamaguchi (1999)	92	1	125	1.5	45		0		70
Brassica	rapa	broccoli raab	annual	herb	forb		flowerbud		92.25	1.85	116.5	1.8	33.5	0.77	0	83	45.1
Brassica	carinata						leaf	World Vegetable Center (2019)		1.43	173	1.77		1.12	0	66	151	1.5
Brassica	carinata						leaf	World Vegetable Center (2019)		1.48	153	1.39		0.72	0	107	183	1.76
Brassica	carinata						leaf	World Vegetable Center (2019)		1.22	145	0.84			0		137	0.51
Brassica	carinata	Ethiopian kale	A/P	herb	forb		leaf			1.37667	157	1.33333		0.92	0	86.5	157	1.25667
Brassica	juncea						leaf	USDA (2019)	90.7	3.2	115	1.64	32	0.25	0	12	70	2
Brassica	juncea						leaf	World Vegetable Center (2019)		0.66	111	0.6		0.31	0	34	74	1.87
Brassica	juncea						leaf	World Vegetable Center (2019)		0.83	165	0.83		0.18	0	47	70	1.84
Brassica	juncea						leaf	World Vegetable Center (2019)		0.73	163	2.51		0.28	0		94	1.55
Brassica	juncea						leaf	World Vegetable Center (2019)		0.89	198	2.5		0.31	0		84	0.75
Brassica	juncea						leaf	World Vegetable Center (2019)		0.67	144	1.53		0.17	0		57	1
Brassica	juncea						leaf	World Vegetable Center (2019)		0.7	214	1.3		0.33	0		77	0.94
Brassica	juncea						leaf	World Vegetable Center (2019)		0.85	223	1.11		0.28	0		60	0.91
Brassica	juncea						leaf	World Vegetable Center (2019)		0.54	158.5	0.97		0.16	0		83	1.19
Brassica	juncea						leaf	World Vegetable Center (2019)		0.58	97	0.47		0.15	0		41	0.68
Brassica	juncea						leaf	World Vegetable Center (2019)		0.47	94	0.35		0.13	0		23	0.16
Brassica	juncea						leaf	World Vegetable Center (2019)		0.54	113	0.34		0.22			27	0.08
Brassica	juncea						leaf	Rubatzky & Yamaguchi (1999)	91.6	0.99	181	2	29		0		93
Brassica	juncea	mustard greens	annual	herb	forb		leaf		91.15	0.896154	152.038	1.24231	30.5	0.230833	0	31	65.6154	1.08083
Brassica	napus						leaf	Rubatzky & Yamaguchi (1999)	87	1.23	205	3	88		0		130
Brassica	napus	ragged jack kale	P/A	herb	forb		leaf		87	1.23	205	3	88		0		130
Brassica	oleracea						leaf	Duke & Atchley (1986)	87.5	1.3	179	2.2					51
Brassica	oleracea						leaf	USDA (2019)	87	1.7	205	3	88	0.4	0	28	130
Brassica	oleracea						leaf	USDA (2019)	84	3.6	150	1.5	47	0.6	0	141	120	1.5
Brassica	oleracea						leaf	USDA (2019)	89.6	4	232	0.47	27	0.21	0	129	35.3	2.26
Brassica	oleracea						leaf	World Vegetable Center (2019)		0.93	290	2.2		0.26	0		117
Brassica	oleracea						leaf	World Vegetable Center (2019)		0.95	192	0.48		0.3	0		64	1.86
Brassica	oleracea						leaf	World Vegetable Center (2019)		1.01	293	2.67		0.27	0		125	1.68
Brassica	oleracea						leaf	World Vegetable Center (2019)		0.87	341	0.96		0.3	0		84	1.1
Brassica	oleracea						leaf	World Vegetable Center (2019)		0.74	303	0.83		0.23			101	0.66
Brassica	oleracea						leaf	Rubatzky & Yamaguchi (1999)	89.7	0.95	202	1.2	45		0		86
Brassica	oleracea	kale & collards	A/P	herb	forb		leaf		87.56	1.605	238.7	1.551	51.75	0.32125	0	99.3333	91.33	1.51
Brassica	oleracea						flowerbud	USDA (2019)	90.1	2.3	48	0.88	25	0.4	0	71	93.2
Brassica	oleracea						flowerbud	World Vegetable Center (2019)		1.07	37	1.21		0.68	0		107	0.56
Brassica	oleracea						flowerbud	World Vegetable Center (2019)		0.97	39	0.98		0.64	0		91	0.39
Brassica	oleracea						flowerbud	World Vegetable Center (2019)		1.05	24	1.86		0.64	0		97	1.14
Brassica	oleracea						flowerbud	World Vegetable Center (2019)		0.99	62.1	0.93		0.68	0		89	0.51
Brassica	oleracea						flowerbud	World Vegetable Center (2019)		1.09	70	0.27		0.31			73	1.8
Brassica	oleracea						flowerbud	Rubatzky & Yamaguchi (1999)	89.2	1.4	101	1.2	23		0		109
Brassica	oleracea	broccoli	annual	herb	forb		flowerbud		89.65	1.26714	54.4429	1.04714	24	0.558333	0	71	94.1714	0.88
Brassica	oleracea						leaf	Rubatzky & Yamaguchi (1999)	84.8	1.6	61	1.5	26		0		98
Brassica	oleracea						leaf	USDA (2019)	86	3.8	42	1.4	23	0.42	0	61	85	0.88
Brassica	oleracea brussel sprouts	brussels sprouts	annual	herb	forb		leaf		85.4	2.7	51.5	1.45	24.5	0.42	0	61	91.5	0.88
Brassica	oleracea						leaf	World Vegetable Center (2019)		0.06	67	2.37		0.96			41	0.01
Brassica	oleracea						leaf	World Vegetable Center (2019)		0.62	50	1.12		0.19			48	0.03
Brassica	oleracea						leaf	Rubatzky & Yamaguchi (1999)	90.5	0.6	54	0.8	20		0		47
Brassica	oleracea						leaf	Rubatzky & Yamaguchi (1999)	91.7	1	43	0.7	17		0		58
Brassica	oleracea						leaf	Rubatzky & Yamaguchi (1999)	92.5	0.09	49	0.5	16		0		50
Brassica	oleracea						leaf	World Vegetable Center (2019)		0.62	61.7	0.4		0.1			43	0.02
Brassica	oleracea						leaf	World Vegetable Center (2019)		0.69	49	0.31		0.21			61	1.09
Brassica	oleracea						leaf	USDA (2019)	90.3	2.1	45	0.8	16	0.22	0	18	57	0.11
Brassica	oleracea						leaf	USDA (2019)	92.8	2.5	40	0.47	12	0.18	0	43	36.6	0.15
Brassica	oleracea						leaf	USDA (2019)	92.5	2.3	47	0.56	15	0.18	0	57	42
Brassica	oleracea						leaf	USDA (2019)	91	3.1	35	0.4	28	0.27	0	80	31	0.12
Brassica	oleracea						leaf	Duke & Atchley (1986)	92.4	0.8	49	0.4					47
Brassica	oleracea						leaf	World Vegetable Center (2019)		0.53	38			0.09	0		45	0.09
Brassica	oleracea	cabbage	annual	herb	forb		leaf		91.7125	1.15462	48.2846	0.735833	17.7143	0.266667	0	49.5	46.6615	0.2025
Brassica	oleracea						flowerbud	World Vegetable Center (2019)		1.29	31.9	1.9		0.5	0		107
Brassica	oleracea						flowerbud	World Vegetable Center (2019)		0.67	26.1	1.01		0.19	0		61	0.18
Brassica	oleracea						flowerbud	Rubatzky & Yamaguchi (1999)	91.1	0.88	25	1	20		0		75
Brassica	oleracea						flowerbud	World Vegetable Center (2019)		1.15	24	0.73		0.37	0		121	0.0007
Brassica	oleracea						flowerbud	World Vegetable Center (2019)		0.87	30	0.65		0.29	0		98	0.37
Brassica	oleracea						flowerbud	USDA (2019)	89.8	3.2	33	0.73	20	0.64	0	57	88.1	0.04
Brassica	oleracea						flowerbud	USDA (2019)	92.1	2	22	0.42	15	0.27		57	48.2	0.08
Brassica	oleracea						flowerbud	World Vegetable Center (2019)		0.78	16	0.36		0.32			87	0.31
Brassica	oleracea	cauliflower	annual	herb	forb		flowerbud		91	1.355	26	0.85	18.3333	0.368571	0	57	85.6625	0.16345
Brassica	oleracea						flowerbud	World Vegetable Center (2019)	88		62	2.2			0		115
Brassica	oleracea						flowerbud	USDA (2019)	92.5	2.6	105	0.6	19	0.41	0	104	29.6	0.5
Brassica	oleracea	gai lan	A/P	herb	forb		flowerbud		90.25	2.6	83.5	1.4	19	0.41	0	104	72.3	0.5
Brassica	oleracea						stem	Rubatzky & Yamaguchi (1999)	91	1.1	42	0.5	27		0		64
Brassica	oleracea	kohlrabi	annual	herb	forb		stem		91	1.1	42	0.5	27		0		64
Broussonetia	luzonicus						flower	Wu, Rauanheimo, Huang, Narayana & Polacchi (1972)	77.6	2.4	282	6.8					24
Broussonetia	luzonica						flowerbud	Duke & Atchley (1986)	78	2.3968	281.994	6.8096			0		23.9904
Broussonetia	luzonica	anabó	perennial	woody	tree		flowerbud		77.8	2.3984	281.997	6.8048			0		23.9952
Cajanus	cajan						unripe seed	USDA (2019)	65.9	5.1	42	1.6	68	1.04	0	173	39	0.39
Cajanus	cajan						unripe seed	Duke & Atchley (1986)	70	3.294	41.9985	1.586			0		39.0095
Cajanus	cajan						unripe seed	Duke & Atchley (1986)	69		28.9852	1.3062			0		25.9996
Cajanus	cajan						unripe seed	World Vegetable Center (2019)		2.9	31	1.13		2.21	0		16
Cajanus	cajan	pigeon pea	A/P	woody	shrub		unripe seed		68.3	3.76467	35.9959	1.40555	68	1.625	0	173	30.0023	0.39
Cajanus	cajan						green pod	Wijaya & Epriliata (2013)	85.2
Cajanus	cajan	pigeon pea	A/P	woody	shrub		green pod		85.2
Calamus	formosanus						leaf	World Vegetable Center (2019)		0.77	79	1.04		2.41	0		8
Calamus	formosanus	rattan	perennial	woody	palm vine		leaf			0.77	79	1.04		2.41	0		8
Canarium	odontophyllum						fruit	Edible Medicinal and Non-Medicinal Plants Volume 1	41.3	4.3	200	1.3	106	0.004
Canarium	odontophyllum	dabai	perennial	woody	tree		fruit		41.3	4.3	200	1.3	106	0.004
Canavalia	ensiformis						unripe fruit	Duke & Atchley (1986)	89	5.4834	34.2
Canavalia	ensiformis	jack bean	annual	vine	herbaceous		unripe fruit		89	5.4834	34.2
Canavalia	ensiformis						unripe seed	Duke & Atchley (1986)	89	1.8012	59.9982	1.995			0		0
Canavalia	ensiformis						unripe seed	Duke & Atchley (1986)	89	1.8012	59.9982	1.995			0
Canavalia	ensiformis						unripe seed	Duke & Atchley (1986)	79	3.2895	33.0025	1.204					31.992
Canavalia	ensiformis	jack bean	annual	vine	herbaceous		unripe seed		85.6667	2.2973	50.9996	1.73133			0		31.992
Canavalia	gladiata						unripe seed	Duke & Atchley (1986)	89	1.5048					0
Canavalia	gladiata						unripe seed	Duke & Atchley (1986)	89	1.5012					0
Canavalia	gladiata	sword bean	perennial	vine	herbaceous		unripe seed		89	1.503					0
Canavalia	gladiata						unripe fruit	Siemonsma & Piluek (1993)	88.6	1.5		20
Canavalia	gladiata						unripe fruit	Yang, Wang & Pan (2009)	89	1.8	49	4.6	29	0.84	0		15	0.4
Canavalia	gladiata						unripe fruit	Rubatzky & Yamaguchi (1999)	83.6	2.6	33	1.2					32
Canavalia	gladiata	sword bean	perennial	vine	herbaceous		unripe fruit		87.0667	1.96667	41	8.6	29	0.84	0		23.5	0.4
Capsicum	annuum						leaf	World Vegetable Center (2019)		1.09	188	2.14		0.81	0	53	93	0.4
Capsicum	annuum						leaf	World Vegetable Center (2019)		1.38	244	2.02		0.15	0		48
Capsicum	annuum	pepper	A/P	herb	shrub		leaf			1.235	216	2.08		0.48	0	53	70.5	0.4
Capsicum	annuum						fruit	Duke & Atchley (1986)	93.4	1.4	9	0.7			0		128
Capsicum	annuum						fruit	Duke & Atchley (1986)	74	6.0114	57.9984	2.8896			0		121.002
Capsicum	annuum						fruit	Duke & Atchley (1986)	87	1.3986	5.0022	1.197			0		40.005
Capsium	annuum						fruit	USDA (2019)	93.9	1.7	10	0.34	10	0.13	0	10	80.4	0.37
Capsium	annuum						fruit	Villasana, Solano, Martinez, Carrillo, Gonzalez, Curiel, Sanchez-Castillo & Romo (2014)	87.32	1.43	6	1.3	14	0.18	0.0305	17	128
Capsium	annuum						fruit	USDA (2019)	92.2	2.1	7	0.43	12	0.25	0	46	127.7	1.58
Capsicum	annuum						fruit	World Vegetable Center (2019)		0.69	11			0.07	0		46	6.43
Capsicum	annuum						fruit	World Vegetable Center (2019)		0.55	10	2.32		0.62	0		84	0.72
Capsicum	annuum						fruit	World Vegetable Center (2019)		0.59	101	1.86		0.32	0		153	2.69
Capsicum	annuum						fruit	World Vegetable Center (2019)		0.66	6	1.6		0.89	0		131	3.8
Capsicum	annuum						fruit	World Vegetable Center (2019)		0.5	9	0.99		0.1	0		165	1.13
Capsicum	annuum						fruit	World Vegetable Center (2019)		0.49	14	0.93		0.13	0		45
Capsicum	annuum						fruit	World Vegetable Center (2019)		0.75	7	0.82		0.19	0		149	4.48
Capsicum	annuum						fruit	World Vegetable Center (2019)		0.59	11	0.51		0.15			72	0.78
Capsicum	annuum						fruit	World Vegetable Center (2019)		0.56	11.4	0.43		0.07			81	0.6
Capsicum	annuum						fruit	World Vegetable Center (2019)		0.71	7	0.12		0.08			101	0.75
Capsicum	annuum						fruit	Rubatzky & Yamaguchi (1999)	86	2.3	9	1.1	27		0		260
Capsicum	annuum						fruit	Rubatzky & Yamaguchi (1999)	92.8	1.3	8	0.8	16		0		144
Capsicum	annuum						fruit	Rubatzky & Yamaguchi (1999)	82.6	1.7	33	2	25		0		163
Capsicum	annuum	pepper	A/P	herb	shrub		fruit		87.6911	1.33842	17.4948	1.12981	17.3333	0.244615	0.00190625	24.3333	116.795	2.12091
Capsium	baccatum						fruit	Menchu, Mendez, Barrera & Ortega (1996)	77.9		48	6.3					61
Capsium	baccatum	aji pepper	perennial	woody	shrub		fruit		77.9		48	6.3					61
Capsiucum	pubescens						fruit	Menchu, Mendez, Barrera & Ortega (1996)	89.3		6	0.8					36
Capsicum	pubescens						fruit	Duke & Atchley (1986)	89	0.9951	6.0027	0.6955			0		34.989
Capsicum	pubescens	rocoto pepper	A/P	herb	shrub		fruit		89.15	0.9951	6.00135	0.74775			0		35.4945
Carica	papaya						fruit unripe	Institute of Nutrition (nd)	92.6	2	47	0.6		0			29
Carica	papaya						unripe fruit	Dignan, Burlingame, Kumar & Aalbersberg (2004)	92	1.5	38	0.3	20	0.2			40	0.8
Carica	papaya						unripe fruit	Duke & Atchley (1986)	92	0.9006	37.999	0.3002			0		39.9977
Carica	papaya	papaya	perennial	woody	tree		unripe fruit		92.2	1.46687	40.9997	0.400067	20	0.2	0		36.3326	0.8
Celosia	argentea						leaf	World Vegetable Center (2019)		1.31	225	2.53		0.9	0	147	29	1.18
Celosia	argentea						leaf	World Vegetable Center (2019)		1.41	186	2.2			0	155	48	1.93
Celosia	argentea						leaf	World Vegetable Center (2019)		1.51	177	2.89			0	175	59	2.29
Celosia	argentea						leaf	Grubbe & Denton (2004)	83.8	1.8	260	7.8
Celosia	argentea						leaf	Rubatzky & Yamaguchi (1999)	86.5	1.5	207	6.4					10
Celosia	argentea	quail grass	annual	herb	forb		leaf		85.15	1.506	211	4.364		0.9	0	159	36.5	1.8
Centella	asiatica						leaf	Institute of Nutrition (nd)	87.8	4.5	182	4.8					30
Centella	asiatica						leaf	Wijaya & Epriliata (2013)			36	7			0		19
Centella	asiatica						leaf	Rubatzky & Yamaguchi (1999)	87.7	1.6	170	5.5			0		7
Centella	asiatica						leaf	Duke & Atchley (1986)	89	2.0009	170.002	3.103			0		4.0018
Centella	asiatica	gotu kola	perennial	herb	forb	aquatic	leaf		88.1667	2.7003	139.5	5.10075			0		15.0005
Chamaedora	tepijelote						flowerbud	Menchu, Mendez, Barrera & Ortega (1996)	85		369	1.4					14
Chamaedora	tepijelote	pacaya	perennial	woody	palm		flowerbud		85		369	1.4					14
Chenopodium	bonus-henricus						leaf	Ernahrung & Forsten (1979)			110	3.5	66				184
Chenopodium	bonus-henricus						leaf	Souci, Fachmann & Kraut (2008)	82.3		130	2.9	51	0.9			219
Chenopodium	bonus-henricus	good King Henry	perennial	herb	forb		leaf		82.3		120	3.2	58.5	0.9			201.5
Chenopodium	quinoa						leaf	Rubatzky & Yamaguchi (1999)	84	2.1	280	2.1			0		90
Chenopodium	quinoa	quinoa	annual	herb	forb		leaf		84	2.1	280	2.1			0		90
Chrysanthemum	indicum						leaf	Edible Medicinal and Non-Medicinal Plants Volume 7			14.14	1.51	2.7	7.8
Chrysanthemum	indicum		perennial	herb	forb		leaf				14.14	1.51	2.7	7.8
Cichorium	endiva						leaf	World Vegetable Center (2019)		0.73	31	0.17		0.3	0	9	8	0.4
Cichorium	endiva						leaf	World Vegetable Center (2019)		0.73	31	0.17		0.3	0	9	8
Cichorium	endiva						leaf	Grubbe & Denton (2004)	94	3.1	52	0.8	15	0.8	0	142	6.5
Cichorium	endiva						leaf	Rubatzky & Yamaguchi (1999)	93.8	0.9	66	1.3	13		0		8
Cichorium	endiva						leaf	World Vegetable Center (2019)
Cichorium	endiva	endive	annual	herb	forb		leaf		93.9	1.365	45	0.61	14	0.466667	0	53.3333	7.625	0.4
Cichorium	intybus						leaf	USDA (2019)	92	4	100	0.9	30	0.42	0	110	24	2.29
Cichorium	intybus						leaf	Duke & Atchley (1986)	93	0.897	78.9981	1.6974			0		10.9986
Cichorium	intybus						leaf	Souci, Fachmann & Kraut (2008)	94.1	1.26	26	0.74	13	0.163	0	50	8.7
Cichorium	intybus						leaf	Kuhnlein & Turner (1991)	93	0.8	86	0.9			0		28.6
Cichorium	intybus						leaf	Rubatzky & Yamaguchi (1999)	95.1		16	0.5	13		0
Cichorium	intybus						leaf	de Cortes Sanchez-Mata & Tardio (2016)	87.9	3.6	153	1.29	19.8	0.37	0.24	253	19.7	2.32
Cichorium	intybus						leaf	Rubatzky & Yamaguchi (1999)	92	0.8	93	0.9	22				24
Cichorium	intybus	chicory	A/P	herb	forb		leaf		92.4429	1.89283	78.9997	0.989629	19.56	0.317667	0.04	137.667	19.3331	2.305
Cleome	gynandra						leaf	Grubbe & Denton (2004)	86.6	1.2	288	6					13
Cleome	gynandra						leaf	World Vegetable Center (2019)		1.06	170	2.21		0.88	0	129	103	0.63
Cleome	gynandra						leaf	World Vegetable Center (2019)		1.03	196	2.15		0.89	0	199	117	2.61
Cleome	gynandra						leaf	World Vegetable Center (2019)		1	171	1.99		0.8	0	208	105	2.72
Cleome	gynandra						leaf	World Vegetable Center (2019)		0.95	301	3.2		0.76	0	349	203	2.28
Cleome	gynandra						leaf	World Vegetable Center (2019)		0.95	301	3.2		0.76	0	349	203
Cleome	gynandra	cleome	annual	herb	forb		leaf		86.6	1.03167	237.833	3.125		0.818	0	246.8	124	2.06
Cnidoscolus	aconitifolius						leaf	Menchu, Mendez, Barrera & Ortega (1996)	79.8		234	2.8					194
Cnidoscolus	aconitifolius						leaf	Duke & Atchley (1986)	80	1.9998	233.997	2.8078			0		194.001
Cnidoscolus	aconitifolius						leaf	Villasana, Solano, Martinez, Carrillo, Gonzalez, Curiel, Sanchez-Castillo & Romo (2014)	80	2.2	324	5.6			0.473		235
Cnidoscolus	aconitifolius						leaf	Grubbe & Denton (2004)	72	2	140	11			0		165
Cnidoscolus	aconitifolius						leaf	Kennedy (2011)				5.8
Cnidoscolus	aconitifolius						leaf	Rubatzky & Yamaguchi (1999)	79.8	2	234	2.8	88				194
Cnidoscolus	aconitifolius						leaf	Grubbe & Denton (2004)	83	3.8	500	1.4			0		318
Cnidoscolus	aconitifolius	chaya	perennial	woody	shrub		leaf		79.1	2.39996	277.666	4.60111	88		0.11825		216.667
Coccinia	grandis						leaf	Wu, Rauanheimo, Huang, Narayana & Polacchi (1972)	90.6	1	126	4.6					48
Coccinia	grandis						leaf	World Vegetable Center (2019)		1.04	37	2.89			0	98	81	1.78
Coccinia	grandis						leaf	World Vegetable Center (2019)		0.77	16	1.04			0		25	0.43
Coccinia	grandis						leaf	Siemonsma & Piluek (1993)				0.2			0
Coccinia	grandis						leaf	Siemonsma & Piluek (1993)							0
Coccinia	grandis	ivy gourd	perennial	vine	woody		leaf		90.6	0.936667	59.6667	2.1825			0	98	51.3333	1.105
Coccinia	grandis						fruit ripe	World Vegetable Center (2019)		5.37	105	2.06			0		5	6
Coccinia	grandis	ivy gourd	perennial	vine	woody		fruit ripe			5.37	105	2.06			0		5	6
Coccinia	grandis						fruit unripe	Institute of Nutrition (nd)	91	2.7	57	1.4		0.5			13
Coccinia	grandis						fruit unripe	World Vegetable Center (2019)		4.92	60	1.55			0		17
Coccinia	grandis						fruit unripe	Rubatzky & Yamaguchi (1999)	93.5	1.6		1.4					15
Coccinia	grandis						fruit unripe	Siemonsma & Piluek (1993)	94		40				0		15
Coccinia	grandis	ivy gourd	perennial	vine	woody		fruit unripe		92.8333	3.07333	52.3333	1.45		0.5	0		15
Coccinia	sessilifolia						fruit	Grubbe & Denton (2004)	82.3	1.3	38	2.2					25
Coccinia	sessilifolia						fruit	Arnold, Wells & Wehmeyer (1985)	82.3	0.2	37.9	0.2	2.2				24.5
Coccinia	sessilifolia	Kalahari cucumber	perennial	vine	herbaceous		fruit		82.3	0.75	37.95	1.2	2.2				24.75
Colocasia	antiquorum						petiole	World Vegetable Center (2019)		0.66	16	0.42			0		3	0.06
Colocasia	antiquorum	eddo	perennial	herb	forb		petiole			0.66	16	0.42			0		3	0.06
Colocasia	esculenta						leaf	USDA (2019)	95.8		12	0.6	8	0.51	0	3	21
Colocasia	esculenta						leaf	Rubatzky & Yamaguchi (1999)	94	0.5	50	1.1	8		0		10
Colocasia	esculenta	taro	perennial	herb	forb		leaf		94.9	0.5	31	0.85	8	0.51	0	3	15.5
Colocasia	esculenta						leaf	Dignan, Burlingame, Kumar & Aalbersberg (2004)	83	5.7	276	2.8	47	0.6			81	2.3
Colocasia	esculenta						leaf	Longvah, Anantan, Bhaskarachary & Venkaiah (2017)										0.07
Colocasia	esculenta						leaf	Kennedy (2011)				2.3	45		0	126
Colocasia	esculenta						leaf	USDA (2019)	85.6	3.7	107	2.25	45	0.41	0	126	52	2.02
Colocasia	esculenta						leaf	Duke & Atchley (1986)	90	0.17					0
Colocasia	esculenta						leaf	Rubatzky & Yamaguchi (1999)	86	1.6	156	1.7	45		0		45
Colocasia	esculenta						leaf	Duke & Atchley (1986)	81	1.209	162.006	1.0044
Colocasia	esculenta						leaf	Duke & Atchley (1986)	87	1.3952	76.0064	0.9984
Colocasia	esculenta						leaf	Smith, Thiam & Burlingame (2010)	90	3.7	98	2	45	0.4	0	126	52	1.64
Colocasia	esculenta						leaf	Grubbe & Denton (2004)	85.7	4	110	7			0	39	52
Colocasia	esculenta	taro	perennial	herb	forb		leaf		86.0375	2.68427	140.716	2.5066	45.4	0.47	0	104.25	56.4	1.5075
Colocasia	esculenta						petiole	Dignan, Burlingame, Kumar & Aalbersberg (2004)	95	2.1	46	1.2	28	0.3			4	0.1
Colocasia	esculenta						petiole	Duke & Atchley (1986)	93	0.8979	48.9976	0.8979			0
Colocasia	esculenta						petiole	Duke & Atchley (1986)	93	0.6006	60.0006	0.5016
Colocasia	esculenta						petiole	World Vegetable Center (2019)		0.8	79	0.36			0		5
Colocasia	esculenta						petiole	World Vegetable Center (2019)		0.87	31	0.3		0.64	0		7
Colocasia	esculenta	taro	perennial	herb	forb		petiole		93.6667	1.0537	52.9996	0.6519	28	0.47	0		5.33333	0.1
Combretum	indicum						leaf	Duke & Atchley (1986)	75	1.9926	104.009				0		70.0116
Combretum	indicum	rangoon creeper	perennial	vine	woody		leaf		75	1.9926	104.009				0		70.0116
Commelina	benghalensis						leaf	Food Composition Table for Bangladesh	92.3	1.4	113	7.1	77	0.63			20
Commelina	benghalensis						leaf	Duke & Atchley (1986)	86	2.4012	209.995
Commelina	benghalensis	géwor	perennial	herb	forb		leaf		89.15	1.9006	161.497	7.1	77	0.63			20
Corchorus	capsularis						leaf	World Vegetable Center (2019)		2.03	357	3.64			0	53	128	2.82
Corchorus	capsularis						leaf	World Vegetable Center (2019)		2.28	210	1.67		0.16	0		40
Corchorus	capsularis	white jute	annual	herb	forb		leaf			2.155	283.5	2.655		0.16	0	53	84	2.82
Corchorus	olitorius						leaf	World Vegetable Center (2019)		1.82	209	2.79		0.67	0	46	111	2.92
Corchorus	olitorius						leaf	World Vegetable Center (2019)		1.82	209	2.79		0.67	0	46	111	2.92
Corchorus	olitorius						leaf	World Vegetable Center (2019)		1.59	213	2.89		0.77	0	47	92	2.84
Corchorus	olitorius						leaf	World Vegetable Center (2019)		1.77	280	2.9		0.74	0	58	88	3.28
Corchorus	olitorius						leaf	World Vegetable Center (2019)		1.77	280	2.9		0.74	0	58	88	3.28
Corchorus	olitorius						leaf	World Vegetable Center (2019)		1.41	431	13.69		0.67	0	79	142	5.09
Corchorus	olitorius						leaf	USDA (2019)	87.7		208	4.76	64	0.79	0	123	37
Corchorus	olitorius						leaf	World Vegetable Center (2019)		1.63	197	2.57		0.69	0	204	137	3.39
Corchorus	olitorius						leaf	World Vegetable Center (2019)		1.63	197	2.57		0.69	0	204	137	3.39
Corchorus	olitorius						leaf	Rubatzky & Yamaguchi (1999)	84.1	1.6	284	6	64		0
Corchorus	olitorius						leaf	World Vegetable Center (2019)		1.26	148	1.2			0		53	1.16
Corchorus	olitorius						leaf	Grubbe & Denton (2004)	80.4	2	360	7.2					80
Corchorus	olitorius	molokhia	annual	herb	forb		leaf		84.0667	1.66364	251.333	4.355	64	0.714444	0	96.1111	97.8182	3.14111
Cosmos	caudatus						leaf	Rubatzky & Yamaguchi (1999)	93	1.6	270
Cosmos	caudatus	vegetable cosmos	annual	herb	forb		leaf		93	1.6	270
Crambe	maritima						leaf	Rubatzky & Yamaguchi (1999)	94		35	0.5			0		26
Crambe	maritima	sea kale	perennial	herb	forb		leaf		94		35	0.5			0		26
Crassocephalum	crepidioides						leaf	World Vegetable Center (2019)		0.82	74	1.74		0.34	0
Crassocephalum	crepidioides						leaf	World Vegetable Center (2019)		1.33	93	1.49		0.49	0		12
Crassocephalum	crepidioides						leaf	Rubatzky & Yamaguchi (1999)	79	1.9	260
Crassocephalum	crepidioides	redflower ragleaf	annual	herb	forb		leaf		79	1.35	142.333	1.615		0.415	0		12
Crithmum	maritimum						leaf	de Cortes Sanchez-Mata & Tardio (2016)	86.8	4.68	224	2.29	76.6	0.665			62
Crithmum	maritimum						leaf	Guerrero Wild Edible Plans	87	5.6	104	3.7	97	0.5			45
Crithmum	maritimum	rock samphire	perennial	herb	forb		leaf		86.9	5.14	164	2.995	86.8	0.5825			53.5
Crotalaria	longirostrata						leaf	Menchu, Mendez, Barrera & Ortega (1996)	81.6	3.24	287	4.7					100
Crotalaria	longirostrata						leaf	Villasana, Solano, Martinez, Carrillo, Gonzalez, Curiel, Sanchez-Castillo & Romo (2014)	80.7	2.2	368	4.7			0.3335		50
Crotalaria	longirostrata						leaf	Duke & Atchley (1986)	82	2.0056	287.003	4.692					99.9672
Crotalaria	longirostrata	chipilin	perennial	woody	shrub		leaf		81.4333	2.48187	314.001	4.69733			0.3335		83.3224
Cucumis	anguria						fruit	Rubatzky & Yamaguchi (1999)	93	0.6	26	0.6	32		0		51
Cucumis	anguria						fruit	Grubbe & Denton (2004)	93		25	0.6			0		48
Cucumis	anguria						fruit	Grubbe & Denton (2004)			27				0		54
Cucumis	anguria						fruit	Grubbe & Denton (2004)							0
Cucumis	anguria	West Indian gherkin	annual	vine	herbaceous		fruit		93	0.6	26	0.6	32		0		51
Cucumis	melo						fruit	World Vegetable Center (2019)		0.24	11	0.39			0		10	0.07
Cucumis	melo	pickling melon	annual	vine	herbaceous		fruit			0.24	11	0.39			0		10	0.07
Cucumis	metuliferus						fruit	Grubbe & Denton (2004)	91	1.1	11.9	0.53	22.3				19
Cucumis	metuliferus	kiwano melon	annual	vine	herbaceous		fruit		91	1.1	11.9	0.53	22.3				19
Cucumis	sativus						unripe fruit	USDA (2019)	95.2	0.5	16	0.28	13	0.2	0	7	2.8	0.03
Cucumis	sativus						unripe fruit	World Vegetable Center (2019)		0.37	28	1.97		0.87	0		16	0.16
Cucumis	sativus						unripe fruit	World Vegetable Center (2019)		0.42	34	1.33		0.47	0		9	0.03
Cucumis	sativus						unripe fruit	Rubatzky & Yamaguchi (1999)	96.3	0.6	19	0.9	11		0		11
Cucumis	sativus						unripe fruit	World Vegetable Center (2019)		0.35	35	0.41		0.14	0		11	0.16
Cucumis	sativus						unripe fruit	World Vegetable Center (2019)		0.42	27	0.36		0.14	0		15	0.16
Cucumis	sativus						unripe fruit	World Vegetable Center (2019)		0.32	22.2	0.24		0.07			7	0.1
Cucumis	sativus						unripe fruit	World Vegetable Center (2019)		0.35	23	0.17		0.09			10	0.04
Cucumis	sativus						unripe fruit	World Vegetable Center (2019)		0.36	27	0.96		0.22			13	0.2
Cucumis	sativus						unripe fruit	World Vegetable Center (2019)		0.27	20	0.58		0.06			6
Cucumis	sativus						unripe fruit	World Vegetable Center (2019)		0.29	6			0.07			11	0.13
Cucumus	sativus						unripe fruit	Rubatzky & Yamaguchi (1999)	96	0.6	13	0.6	14		0		19
Cucumus	sativus	cucumber	annual	vine	herbaceous		unripe fruit		95.8333	0.404167	22.5167	0.709091	12.6667	0.233	0	7	10.9	0.112222
Cucurbita	ficifolia						fruit unripe	Menchu, Mendez, Barrera & Ortega (1996)	92.7		12	0.2					46
Cucurbita	ficifolia						fruit unripe	Villasana, Solano, Martinez, Carrillo, Gonzalez, Curiel, Sanchez-Castillo & Romo (2014)	95.5	0.3	12	0.8	15	0.79	0.003		7
Cucurbita	ficifolia						unripe fruit	Duke & Atchley (1986)	0.927	0.2993	12.0012	0.1971					45.9973
Cucurbita	ficifolia	chilacayote	perennial	vine	herbaceous		unripe fruit		63.0423	0.29965	12.0004	0.399033					32.9991
Cucurbita	ficifolia						fruit ripe	Menchu, Mendez, Barrera & Ortega (1996)	93.6		15	0.4					11
Cucurbita	ficifolia						fruit	Siemonsma & Piluek (1993)	91		48	1			0		21
Cucurbita	ficifolia						fruit	Duke & Atchley (1986)	94	0.4032	15.0016	0.4032					11.0016
Cucurbita	ficifolia						fruit	Rubatzky & Yamaguchi (1999)	93.6	0.4	19	0.4			0		11
Cucurbita	ficifolia						fruit	Siemonsma & Piluek (1993)	85		14				0		6
Cucurbita	ficifolia	chilacayote	perennial	vine	herbaceous		fruit		91.44	0.4016	22.2003	0.5508			0		12.0003
Cucurbita	maxima						flower	World Vegetable Center (2019)		0.75	92	1.03		0.45	0	30	14	4.16
Cucurbita	maxima	winter squash	annual	vine	herbaceous		flower			0.75	92	1.03		0.45	0	30	14	4.16
Cucurbita	maxima						unripe fruit	World Vegetable Center (2019)		0.69	20	0.57		0.31	0	10	8	0.47
Cucurbita	maxima	winter squash	annual	vine	herbaceous		unripe fruit			0.69	20	0.57			0	10	8	0.47
Cucurbita	maxima						fruit	World Vegetable Center (2019)		0.84	9	0.73		0.28	0	12	9	1.2
Cucurbita	maxima						fruit	USDA (2019)	88	3.9	14	0.4	19	0.13	0	16	11	0.16
Cucurbita	maxima	winter squash	annual	vine	herbaceous		fruit		88	2.37	11.5	0.565	19	0.205	0	14	10	0.68
Cucurbita	maxima						leaf	World Vegetable Center (2019)		1.19	119	2.1		0.61	0	57	38	3.26
Cucurbita	maxima						leaf	World Vegetable Center (2019)		1.07	85	1.25		0.65	0	72	18	1.96
Cucurbita	maxima	winter squash	annual	vine	herbaceous		leaf			1.13	102	1.675		0.63	0	64.5	28	2.61
Cucurbita	moschata						fruit	USDA (2019)	86.4	2	48	0.7	34	0.15	0	27	21	1.44
Cucurbita	moschata	winter squash	annual	vine	herbaceous		fruit		86.4	2	48	0.7	34	0.15	0	27	21	1.44
Cucurbita	moschata						leaf	World Vegetable Center (2019)		1.11	31	1.69		0.37	0		9
Cucurbita	moschata	winter squash	annual	vine	herbaceous		leaf			1.11	31	1.69		0.37	0		9
Cucurbita	pepo						unripe fruit	USDA (2019)	94.79	1	16	0.37	18	0.32	0	24	17.9	0.12
Cucurbita	pepo						unripe fruit	Rubatzky & Yamaguchi (1999)	93.5	0.65	22	0.5	19		0		19
Cucurbita	pepo	summer squash	annual	vine	herbaceous		unripe fruit		94.145	0.825	19	0.435	18.5		0		18.45	0.12
Cucurbita	pepo						fruit	USDA (2019)	87.78	1.5	33	0.7	32	0.13	0	17	11
Cucurbita	pepo						fruit	Rubatzky & Yamaguchi (1999)	91.4	1.2	22	0.8	10		0		9
Cucurbita	pepo	winter squash	annual	vine	herbaceous		fruit		89.59	1.35	27.5	0.75	21	0.13	0	17	10
Cucurbita	spp						flower	Rubatzky & Yamaguchi (1999)	92.2	0.65	80	0.7	24		0		28
Cucurbita	spp.						flower	USDA (2019)	95.1		39	0.7	24		0	59	28
Cucurbita	spp.	winter squash	annual	vine	herbaceous		flower		93.65	0.65	59.5	0.7	24		0	59	28
Cucurbita	spp.						unripe fruit	USDA (2019)	94.6	1.1	15	0.35	17	0.29	0	29	17	0.12
Cucurbita	spp.						unripe fruit	USDA (2019)	94.3	1	21	0.44	20	0.29	0	19	19.3	0.13
Cucurbita	spp.	summer squash	annual	vine	herbaceous		unripe fruit		94.45	1.05	18	0.395	18.5	0.29	0	24	18.15	0.125
Cucurbita	spp						fruit	Rubatzky & Yamaguchi (1999)	88.8	1.32	25	0.7	22		0		10
Cucurbita	spp	winter squash	annual	vine	herbaceous		fruit		88.8	1.32	25	0.7	22		0		10
Cucurbita	spp						leaf	Rubatzky & Yamaguchi (1999)	88	1.8	303	1.5	38		0		45
Cucurbita	spp.						leaf	USDA (2019)	92.9		39	2.2	38	0.2	0	36	11
Cucurbita	spp.	winter squash	annual	vine	herbaceous		leaf		90.45	1.8	171	1.85	38	0.2	0	36	28
Cyamopsis	tetragonolobus						unripe fruit	World Vegetable Center (2019)		1.59	116	2.81		0.65	0	116	55	1.05
Cyamopsis	tetragonolobus						unripe fruit	Rubatzky & Yamaguchi (1999)	81						0		47
Cyamopsis	tetragonolobus	cluster bean	annual	vine	herbaceous		unripe fruit		81	1.59	116	2.81		0.65	0	116	51	1.05
Cyclanthera	pedata						unripe fruit	Rubatzky & Yamaguchi (1999)	94.1	0.7	14	0.8					14
Cyclanthera	pedata	acocha	annual	vine	herbaceous		unripe fruit		94.1	0.7	14	0.8					14
Cynara	cardunculus						petiole	USDA (2019)	94	1.6	70	0.7	42	0.17	0	68	2
Cynara	cardunculus						petiole	Rubatzky & Yamaguchi (1999)	94		23		0.7		0		2
Cynara	cardunculus						petiole	Duke & Atchley (1986)	94	0.9982	113.999	1.5004			0		0.9982
Cynara	cardunculus	cardoon	A/P	herb	forb		petiole		94	1.2991	68.9998	1.1002	21.35	0.17	0	68	1.66607
Cynara	scolymus						flowerbud	USDA (2019)	84.9	5.4	44	1.28	60	0.49		68	11.7	0.19
Cynara	scolymus						flowerbud	Rubatzky & Yamaguchi (1999)	85.7	2	50	1.3	41				10
Cynara	scolymus						flowerbud	Duke & Atchley (1986)	77	1.2031	119.992	2.2927			0
Cynara	scolymus						flowerbud	Souci, Fachmann & Kraut (2008)	82.5	10.8	53	1.5	26		0		7.6	0.19
Cynara	scolymus						flowerbud	Duke & Atchley (1986)	77	3.7968	80.004	1.9888			0		0
Cynara	scolymus						flowerbud	Duke & Atchley (1986)	86	2.407	50.9965	1.305			0		12.006
Cynara	scolymus						flowerbud	Duke & Atchley (1986)	90	2.1952	44.002	0.8036					4.998
Cynara	scolymus						flowerbud	Duke & Atchley (1986)	86	0.8037	63.9999	0.1974
Cynara	scolymus	artichoke	perennial	herb	forb		flowerbud		83.6375	3.57573	63.2493	1.33344	42.3333	0.49	0	68	7.71733	0.19
Cyphomandra	betacea						fruit	Wu, Rauanheimo, Huang, Narayana & Polacchi (1972)	85.9	2.2	13	0.8					17
Cyphomandra	betacea						fruit	Souci, Fachmann & Kraut (2008)	86		12	0.7	21				24
Cyphomandra	betacea						fruit	Menchu, Mendez, Barrera & Ortega (1996)	85.9		9	0.8					29
Cyphomandra	betacea						fruit	Leterme, Bildgen, Estrada & Londono (2006)	81.7		26	0.41	20	0.02
Cyphomandra	betacea						fruit	Duke & Atchley (1986)	86	2.1996	13.0002	0.8037			0		29.0037
Cyphomandra	betacea						fruit	Duke & Atchley (1986)	86	1.5933	8.9958	0.8037			0
Cyphomandra	betacea						fruit	Rubatzky & Yamaguchi (1999)	85.5	2.6	33	0.7			0		22
Cyphomandra	betacea						fruit	Duke & Atchley (1986)	83	4.2039	70.9992	0.692			0		20.8638
Cyphomandra	betacea	tree tomato	perennial	woody	shrub		fruit		85	2.55936	23.2494	0.713675	20.5	0.02	0		23.6446
Cyrtosperma	merkusii						leaf	Rubatzky & Yamaguchi (1999)	86	1.5
Cyrtosperma	merkusii	giant taro	perennial	herb	forb		leaf		86	1.5
Dacryodes	edulis						fruit	Duke & Atchley (1986)	56	8.1906	43.0116	0.7884					19.0092
Dacryodes	edulis	safou	perennial	woody	tree		fruit		56	8.1906	43.0116	0.7884					19.0092
Dendrocalamus	asper						shoot	Nutritional properties of bamboo shoots	89.4	3.54							3.2	0.91
Dendrocalamus	asper	bamboo	perennial	woody	bamboo		shoot		89.4	3.54							3.2	0.91
Dendrocalamus	brandesii						shoot	Nutritional properties of bamboo shoots	89.8	4.03							1.59	0.42
Dendrocalamus	brandesii	bamboo	perennial	woody	bamboo		shoot		89.8	4.03							1.59	0.42
Dendrocalamus	giganteus						shoot	Nutritional properties of bamboo shoots	90.7	2.65							3.28	0.69
Dendrocalamus	giganteus	bamboo	perennial	woody	bamboo		shoot		90.7	2.65							3.28	0.69
Dendrocalamus	hamiltonii						shoot	Loukrapah, Rajendram, Chyne & Longvan (2019)	93.2	2.34	5.72	0.41	20.9	0.46		128	2.84	0.122
Dendrocalamus	hamiltonii						shoot	Nutritional properties of bamboo shoots	92.51	3.9	3	2.69	6.09	0.7			2.45	0.71
Dendrocalamus	hamiltonii	bamboo	perennial	woody	bamboo		shoot		92.855	3.12	4.36	1.55	13.495	0.58		128	2.645	0.416
Dendrocalamus	membranaceus						shoot	Nutritional properties of bamboo shoots	89.3	2.91							1.58	0.65
Dendrocalamus	membranaceus	bamboo	perennial	woody	bamboo		shoot		89.3	2.91							1.58	0.65
Dicliptera	chinensis						leaf	World Vegetable Center (2019)		1.7	464	2.13			0	34	42	5.1
Dicliptera	chinensis						leaf	World Vegetable Center (2019)		1.7	464	2.13			0		42
Dicliptera	chinensis	Chinese foldwing	perennial	herb	forb		leaf			1.7	464	2.13			0	34	42	5.1
Diplazium	esculentum						leaf	French (2006)	91.8			4.4			0		25
Diplazium	esculentum						leaf	Food Plants of Papua New Guinea	91.8			4.4					25
Diplazium	esculentum						leaf	World Vegetable Center (2019)		1.11	23	0.94		0.36			3
Diplazium	esculentum	vegetable fern	perennial	herb	fern		leaf		91.8	1.11	23	3.24667		0.36	0		17.6667
Diplotaxis	tenuifolia						leaf	Guerrero Wild Edible Plans							0		144
Diplotaxis	tenuifolia	sylvetta	perennial	herb	forb		leaf								0		144
Dystaenia	takesimiana						leaf	"Sombadi as Human Food"	73.4	5.5
Dystaenia	takesimiana						leaf	"Sombadi as Human Food"	72.6	6.2
Dystaenia	takesimiana	Korean celery	perennial	herb	forb		leaf		73	5.85
Emilia	sonchifolia						leaf	World Vegetable Center (2019)		1.03	172	2.4		0.86	0		23
Emilia	sonchifolia	lilac tasselflower	annual	herb	forb		leaf			1.03	172	2.4		0.86	0		23
Enydra	fluctuans						leaf	Siemonsma & Piluek (1993)	92.2	1.3		5.6
Enydra	fluctuans	buffalo spinach	perennial	herb	forb	aquatic	leaf		92.2	1.3		5.6
Epilobium	angustifolium						shoot	Center for Indigenous People's Nutrition and Environment (n.d.)	92	0.8	32	0.5	20	0.7
Epilobium	angustifolium						leaf	USDA (2019)	70.8	10.6	429	2.4	156	2.66	0	112	2.2	0
Epilobium	angustifolium						leaf	Auswertungs-und Informationsdienst für Ernährung, Landwirtschaft und Forsten			150	2.7	81				351
Epilobium	angustifolium						leaf	Kuhnlein & Turner (1991)	76	1.8	175	2.7			0		88
Epilobium	angustifolium						leaf	Kuhnlein & Turner (1991)	92	0.9	32	0.1			0
Epilobium	angustifolium	fireweed	perennial	herb	forb		leaf		82.7	3.525	163.6	1.68	85.6667	1.68	0	112	147.067	0
Eruca	sativa						leaf	USDA (2019)	91.7	1.6	160	1.46	47	0.47	0	97	0.3	0.43
Eruca	sativa						leaf	Rubatzky & Yamaguchi (1999)	91.8	0.9	352	0.8			0
Eruca	sativa						leaf	World Vegetable Center (2019)		0.84	160	1.75		0.41	0	87	107	1.99
Eruca	sativa	arugula	annual	herb	forb		leaf		91.75	1.11333	224	1.33667	47	0.44	0	92	53.65	1.21
Eruca	vesicaria						leaf	World Vegetable Center (2019)		1.33	349	2.15			0		347	1.44
Eruca	vesicaria						leaf	World Vegetable Center (2019)		0.93	426	1.39			0		204	0.74
Eruca	vesicaria	wild arugula	annual	herb	forb		leaf			1.13	387.5	1.77			0		275.5	1.09
Eryngium	aquaticum						leaf	Duke & Atchley (1986)	86	2.002	294.995	5.7057			0		27.9994
Eryngium	aquaticum	marsh eryngo	perennial	herb	forb	aquatic	leaf		86	2.002	294.995	5.7057			0		27.9994
Eryngium	creticum						leaf	FAO (1982)	88.7	2.1	37	0.6	22				2
Eryngium	creticum	eryngo	perennial	herb	forb		leaf		88.7	2.1	37	0.6	22				2
Erythrina	berteroana						flower	Villasana, Solano, Martinez, Carrillo, Gonzalez, Curiel, Sanchez-Castillo & Romo (2014)	82.7	2.4	108	2.4			0.0065		37
Erythrina	berteroana	colorín	perennial	woody	tree		flower		82.7	2.4	108	2.4			0.0065		37
Erythrina	edulis						unripe seed	Leterme, Bildgen, Estrada & Londono (2006)	79.4		12	0.98	38	0.58
Erythrina	edulis						unripe seed	Leterme, Bildgen, Estrada & Londono (2006)	80.6		20	0.56	38	0.54
Erythrina	edulis	chachafruto	perennial	woody	tree		unripe seed		80		16	0.77	38	0.56
Erythrina	variegata				tree		leaf	Edible Medicinal and Non-Medicinal Plants Volume 7	78.1	3	639.1	4.1
Erythrina	variegata		perennial	woody	tree		leaf		78.1	3	639.1	4.1
Euterpe	oleracea						leaf	Rubatzky & Yamaguchi (1999)	89.8	0.8	86	0.7	9				17
Euterpe	oleracea	acaí	perennial	woody	palm		leaf		89.8	0.8	86	0.7	9				17
Fernaldia	pandurata						flowerbud	Menchu, Mendez, Barrera & Ortega (1996)	89.2		58	1.1					12
Fernaldia	pandurata	loroco	perennial	vine	woody		flowerbud		89.2		58	1.1					12
Ficus	spp						leaf	Dignan, Burlingame, Kumar & Aalbersberg (2004)	65	2.7	5	1	106	0.4			60	2
Ficus	spp	"poke" fig leaf	perennial	woody	tree		leaf		65	2.7	5	1	106	0.4			60	2
Foeniculum	vulgare						petiole	Rubatzky & Yamaguchi (1999)	88	0.5	73	1.5	36		0		20
Foeniculum	vulgare	Florence fennel	annual	herb	forb		petiole		88	0.5	73	1.5	36		0		20
Gigantochloa	albociliata						shoot	nutritional properties of bamboo shoots	89.23	4.15							1	0.6
Gigantochloa	albociliata	bamboo	perennial	woody	bamboo		shoot		89.23	4.15							1	0.6
Glebionis	corinaria						leaf	USDA (2019)	91.4	3	117	2.29	32	0.71	0	177	1.4	0
Glebionis	coronaria						leaf	World Vegetable Center (2019)		1.08	99	1.69		0.42	0	24	32	1
Glebionis	coronaria						leaf	World Vegetable Center (2019)		0.89	114	1.4			0		25
Glebionis	coronaria						leaf	Siemonsma & Piluek (1993)	90		75	2.7			0		17
Glebionis	coronaria						leaf	Siemonsma & Piluek (1993)	94			4.2			0		45
Glebionis	coronaria						leaf	World Vegetable Center (2019)		0.52	87	1.98		0.16	0		18	116
Glebionis	coronaria						leaf	World Vegetable Center (2019)		0.37	94	1.58		0.19	0		3	0.46
Glebionis	coronaria						leaf	World Vegetable Center (2019)		0.41	92	1.31		0.15	0		6	0.21
Glebionis	coronaria						leaf	World Vegetable Center (2019)		0.62	92	1.15		0.19	0		11	0.36
Glebionis	coronaria						leaf	World Vegetable Center (2019)		0.72	55	0.62		0.25	0		13	1.5
Glebionis	coronaria						leaf	World Vegetable Center (2019)		0.53	42	0.59		0.09	0		4	1.08
Glebionis	coronaria	garland chrysanthemum	annual	herb	forb		leaf		91.8	0.904444	86.7	1.77364	32	0.27	0	100.5	15.9455	15.0762
Glycine	max						unripe seed	World Vegetable Center (2019)		1.12	36	4.04		1.48	0	100	38	6.46
Glycine	max						unripe seed	USDA (2019)	67.5	4.2	197	3.55	65	0.99	0	165	29
Glycine	max						unripe seed	Rubatzky & Yamaguchi (1999)	67.5	1.8	107	2.8			0		25
Glycine	max	edamame soybean	annual	herb	forb		unripe seed		67.5	2.37333	113.333	3.46333	65	1.235	0	132.5	30.6667	6.46
Gnetum	buchholzianum						leaf	Grubbe & Denton (2004)	70	5.5	130						100
Gnetum	bucholzianum						leaf	Duke & Atchley (1986)	70	5.4964	130.011	5.587					99.9922
Gnetum	bucholzianum	eru	perennial	vine	woody		leaf		70	5.4982	130.006	5.587					99.9961
Gnetum	gnemon						leaf	Dignan, Burlingame, Kumar & Aalbersberg (2004)	77	4.5	29	3.7	70	0.4			66	2
Gnetum	gnemon						leaf	Duke & Atchley (1986)	82		109.994	9.9912
Gnetum	gnemon						leaf	Duke & Atchley (1986)	75	2.6076	127.994	2.706			0		112.988
Gnetum	gnemon						leaf	French (2006)	66			2.7			0
Gnetum	gnemon						leaf	Duke & Atchley (1986)	66	11.7992	335.985	2.6832			0		215
Gnetum	gnemon	bago	perennial	woody	tree		leaf		73.2	6.30227	150.743	4.35608	70	0.4	0		131.329	2
Gundelia	tournefortii						leaf	FAO (1982)	95.3	0.5	63	0.8					3
Gundelia	tournefortii	galgal	perennial	herb	forb		leaf		95.3	0.5	63	0.8					3
Gundelia	tournefortii						flowerstalk	Chemical composition of some edible wild plants of eastern Anatolia	82.5	6.37	0.01	0.71	0.01	3.5
Gundelia	tournefortii	galgal	perennial	herb	forb		flowerstalk		82.5	6.37	0.01	0.71	0.01	3.5
Gustavia	superba						fruit	Leterme, Bildgen, Estrada & Londono (2006)	79.3		28	1.76	48	0.58
Gustavia	superba						fruit	Leterme, Bildgen, Estrada & Londono (2006)	80.2		32	1.08	48	0.44
Gustavia	superba						fruit	Leterme, Bildgen, Estrada & Londono (2006)	79.7		44	1.46	64	0.49
Gustavia	superba	mebrillo	perennial	woody	tree		fruit		79.7333		34.6667	1.43333	53.3333	0.503333
Gynura	bicolor						leaf	World Vegetable Center (2019)		0.8	179	10.37		0.06	0		11
Gynura	bicolor (purple)						leaf	World Vegetable Center (2019)		0.81	126	1.22			0		11	0.9
Gynura	bicolor (white)						leaf	World Vegetable Center (2019)		0.74	81	1.11			0		19	0.14
Gynura	bicolor	Okinawa spinach	perennial	herb	forb		leaf			0.783333	128.667	4.23333		0.06	0		13.6667	0.52
Hemerocallis	fulva						flower	Kuhnlein & Turner (1991)			87	1.2			0		83
Hemerocallis	fulva	daylily	perennial	herb	forb		flower	Kuhnlein & Turner (1991)			87	1.2			0		83
Hemerocallis	fulva						flowerbud	World Vegetable Center (2019)		0.97	18	0.64			0		39	2.07
Hemerocallis	fulva	daylily	perennial	herb	forb		flowerbud			0.97	18	0.64			0		39	2.07
Hemerocallis	lilioasphodelus						flowerbud	Duke & Atchley (1986)	86	1.2035					0
Hemerocallis	lilioasphodelus						flowerbud	Duke & Atchley (1986)	87	1.2032	87.0016	1.2032					88
Hemerocallis	lilioasphodelus	daylily	perennial	herb	forb		flowerbud		86.5	1.20335	87.0016	1.2032			0		88
Hemerocallis	lilioasphodelus						flower	Kuhnlein & Turner (1991)	87	1.2	87	1.2					88
Hemerocallis	lilioasphodelus	daylily	perennial	herb	forb		flower		87	1.2	87	1.2					88
Hemerocallis	spp						flowerbud	Yang, Wang & Pan (2009)	40.3	3.85	150.5	4.05	42.5	1.995	0.075		5	2.46
Hemerocallis	spp	daylily	perennial	herb	forb		flowerbud		80.6	3.85	150.5	4.05	42.5	1.995	0.075		5	2.46
Heracleum	lanatum						stalk (peeled)	Center for Indigenous People's Nutrition and Environment (n.d.)	95	0.9	29		11	0.4		16.1	3.5
Heracleum	lanatum						stalk (peeled)	Guerrero Wild Edible Plans	95	1.4	24	0.2	11	0.4			3.5
Heracleum	lanatum	cow parsnip	perennial	herb	forb		stalk (peeled)		95	1.15	26.5	0.2	11	0.4		16.1	3.5
Hibiscus	sabdariffa						leaf	Rubatzky & Yamaguchi (1999)	85.6	1.6	213	4.8					54
Hibiscus	sabdariffa						leaf	World Vegetable Center (2019)		1.3	217	1.26			0		25
Hibiscus	sabdariffa						leaf	World Vegetable Center (2019)		1.03	148	1.12			0		31	1.95
Hibiscus	sabdariffa	roselle	annual	herb	shrub		leaf		85.6	1.31	192.667	2.39333			0		36.6667	1.95
Hosta	longipes						leaf	Standard Food Composition Table Korea; Analysis of Essential Macro-micro mineral content of twelve hosta taxa	84.4		312	1.1076	8.7516	3.588
Hosta	longipes						leaf	Standard Food Composition Table Korea; Analysis of Essential Macro-micro mineral content of twelve hosta taxa	84.4		312	0.4524	8.9076	3.588
Hosta	longipes	hosta	perennial	herb	forb		leaf		84.4		312	0.78	8.8296	3.588
Hosta	sieboldiana						leaf	Standard Food Composition Table Korea; Analysis of Essential Macro-micro mineral content of twelve hosta taxa	84.4		249.6	0.4836	8.424	2.9016
Hosta	sieboldiana						leaf	Standard Food Composition Table Korea; Analysis of Essential Macro-micro mineral content of twelve hosta taxa	84.4		358.8	0.624	9.4536	4.5864
Hosta	sieboldiana	hosta	perennial	herb	forb		leaf		84.4		304.2	0.5538	8.9388	3.744
Hosta	sieboldii						leaf	Standard Food Composition Table Korea; Analysis of Essential Macro-micro mineral content of twelve hosta taxa	84.4		358	0.62	9.45	4.59
Hosta	sieboldii						leaf	Standard Food Composition Table Korea; Analysis of Essential Macro-micro mineral content of twelve hosta taxa	84.4		327	3.92	9.41	3.82
Hosta	sieboldii	hosta	perennial	herb	forb		leaf		84.4		342.5	2.27	9.43	4.205
Houttyunia	cordata						leaf	World Vegetable Center (2019)		1.93	174	2.79			0	22	71	3.21
Houttyunia	cordata						leaf	World Vegetable Center (2019)		1.93	174	2.79			0	22	71
Houttyunia	cordata						leaf	World Vegetable Center (2019)		2.23	205	6.31		0.39	0		72
Houttyunia	cordata	fish-smelling herb	perennial	herb	forb		leaf			2.03	184.333	3.96333		0.39	0	22	71.3333	3.21
Humulus	lupulus						shoot	de Cortes Sanchez-Mata & Tardio (2016)	85.8	4.85	73.5	0.74	32.5	0.975	0.03	144	51.5	14.42
Humulus	lupulus	hops	perennial	vine	herbaceous		shoot		85.8	4.85	73.5	0.74	32.5	0.975	0.03	144	51.5	14.42
Ipomoea	aquatica						leaf	World Vegetable Center (2019)		0.98	156	3.27		0.34	0	25	51	1.61
Ipomoea	aquatica						leaf	World Vegetable Center (2019)		1.67	294	2.58		0.53	0	30	37	2.85
Ipomoea	aquatica						leaf	World Vegetable Center (2019)		1.49	211	1.68		0.52	0	34	32	0.95
Ipomoea	aquatica						leaf	World Vegetable Center (2019)		1.08	223	12.71		1.02	0		60	0.89
Ipomoea	aquatica						leaf	Duke & Atchley (1986)	85	3.135	106.5				0
Ipomoea	aquatica						leaf	Duke & Atchley (1986)	90	1.27	120	3.6			0
Ipomoea	aquatica						leaf	Duke & Atchley (1986)	90	1.133	61.8	2.575					48.41
Ipomoea	aquatica						leaf	Duke & Atchley (1986)	90	1.1021	72.9961	2.5029					32.0021
Ipomoea	aquatica						leaf	World Vegetable Center (2019)		0.84	118	5.52		0.24	0		25	1.33
Ipomoea	aquatica						leaf	World Vegetable Center (2019)		0.87	120	3.85		0.25	0		22	1.1
Ipomoea	aquatica						leaf	Rubatzky & Yamaguchi (1999)	90.6	1.2	84	2.7	60		0		50
Ipomoea	aquatica						leaf	World Vegetable Center (2019)		0.82	82	2.04		0.26	0		36	1.07
Ipomoea	aquatica						leaf	World Vegetable Center (2019)		0.8	44	0.88		0.21	0		9	1.71
Ipomoea	aquatica						leaf	Siemonsma & Piluek (1993)							0		130
Ipomoea	aquatica						leaf	Siemonsma & Piluek (1993)	90.2	1	81				0		30
Ipomoea	aquatica						leaf	Wijaya & Epriliata (2013)	90.2						0		130
Ipomoea	aquatica						leaf	Wijaya & Epriliata (2013)	90.2						0		30
Ipomoea	aquatica	water spinach	A/P	herb	forb	aquatic	leaf		89.525	1.24215	126.735	3.65899	60	0.42125	0	29.6667	48.1608	1.43875
Ipomoea	batatas						leaf	USDA (2019)	86.8	5.3	78	0.97	70		0	1	11
Ipomoea	batatas						leaf	PROSEA 9: Carbohydrates				0.7			0	62	13
Ipomoea	batatas						leaf	Kennedy (2011)				1	61		0	80
Ipomoea	batatas						leaf	World Vegetable Center (2019)		1.53	264	8.56		0.98	0		42	1.62
Ipomoea	batatas						leaf	World Vegetable Center (2019)		1.11	67	0.51		0.15	0		25	3.29
Ipomoea	batatas						leaf	Rubatzky & Yamaguchi (1999)	87	1.7	147	2.6	35		0		23
Ipomoea	batatas						leaf	World Vegetable Center (2019)		1.15	303	2.59		0.29	0		72	2.34
Ipomoea	batatas						leaf	World Vegetable Center (2019)		1.25	32	1.35			0		13	0.24
Ipomoea	batatas						leaf	Duke & Atchley (1986)	87	1.596	85.9978	4.4954			0		21.0007
Ipomoea	batatas						leaf	Duke & Atchley (1986)	86	1.6029	110.997	2.9044			0		58.0058
Ipomoea	batatas						leaf	World Vegetable Center (2019)		1.46	78	1.34		0.18	0		16
Ipomoea	batatas						leaf	World Vegetable Center (2019)		1.14	112	1.18		0.32	0		35	1.23
Ipomoea	batatas						leaf	World Vegetable Center (2019)		1.28	53	1.1			0		19	1.31
Ipomoea	batatas						leaf	World Vegetable Center (2019)		1.15	162	3.1		0.37	0		41	1.56
Ipomoea	batatas	sweet potato	A/P	herb	forb		leaf		86.7	1.68908	124.416	2.31427	55.3333	0.381667	0	47.6667	29.9236	1.65571
Ipomoea	muricata						flowerbud	"Genetic variability in clove bean"		0.67	184	0.13					24
Ipomoea	muricata						flowerbud	"Genetic variability in clove bean"		3.33	230.67	0.19					48
Ipomoea	muricata	clove bean	perennial	vine	herbaceous		flowerbud			2	207.335	0.16					36
Kaempferia	galanga						leaf	French (2006)	91.1								11
Kaempferia	galanga	chandramula	perennial	herb	forb		leaf		91.1								11
Kalimeris	indica						leaf	Yang, Wang & Pan (2009)	91.4	1.6	67	2.4	14	0.87	0		26	0.72
Kalimeris	indica						leaf	Watanabe & Kawai (2018)	84.6	7.8	110	3.7	42	0.7		170	42	4.2
Kalimeris	indica	ma lan	perennial	herb	forb		leaf		88	4.7	88.5	3.05	28	0.785	0	170	34	2.46
Lablab	purpureus						unripe fruit	World Vegetable Center (2019)		1.16	35	1.18		0.25	0	31	15	0.2
Lablab	purpureus						unripe fruit	World Vegetable Center (2019)		2.9	89	1.13		0.82	0	31	14	0.19
Lablab	purpureus						unripe fruit	Grubbe & Denton (2004)	87	1.5	0.6	5.4			0	62	11
Lablab	purpureus						unripe fruit	Rubatzky & Yamaguchi (1999)	87	1.5	130	1.2	37		0		11
Lablab	purpureus						unripe fruit	World Vegetable Center (2019)		1.22	25	0.69			0		31	0.06
Lablab	purpureus						unripe fruit	World Vegetable Center (2019)		1.44	45	0.48		0.99			22
Lablab	purpureus	lablab bean	A/P	vine	herbaceous		unripe fruit		87	1.62	54.1	1.68	37	0.686667	0	41.3333	17.3333	0.15
Lablab	purpureus						unripe seed	USDA (2019)	87.87	3.3	50	0.74	40	0.37	0	62	12.9	0.51
Lablab	purpureus						unripe seed	Grubbe & Denton (2004)	87.9		50	1.2			0
Lablab	purpureus	lablab bean	A/P	vine	herbaceous		unripe seed		87.885	3.3	50	0.97	40	0.37	0	62	12.9	0.51
Lactuca	indica						leaf	World Vegetable Center (2019)		1.14	94	0.99		0.22	0		24
Lactuca	indica	Indian lettuce	annual	herb	forb		leaf			1.14	94	0.99		0.22	0		24
Lactuca	sativa						leaf	USDA (2019)	95.64	1.2	18	0.41	7	0.15	0	29	2.8	0.18
Lactuca	sativa						leaf	USDA (2019)	95.64	0.9	33	1.2	12	0.2	0	36	3.7	0.15
Lactuca	sativa						leaf	USDA (2019)	94.98	1.3	36	0.86	13	0.18	0	38	9.2	0.22
Lactuca	sativa						leaf	USDA (2019)	95.6	1.1	35	1.24	13	0.2	0	73	3.7	0.18
Lactuca	sativa						leaf	USDA (2019)	94.61	2.1	33	0.97	14	0.23	0	136	4	0.13
Lactuca	sativa						leaf	World Vegetable Center (2019)		0.63	43	2.45		0.19	0		15	0.12
Lactuca	sativa						leaf	Rubatzky & Yamaguchi (1999)	95.5	0.5	35	1.8	11		0		8
Lactuca	sativa						leaf	World Vegetable Center (2019)		0.48	47	1.51		0.19	0		22	1.13
Lactuca	sativa						leaf	Rubatzky & Yamaguchi (1999)	95	0.51	22	1.5	11		0		7
Lactuca	sativa						leaf	Rubatzky & Yamaguchi (1999)	94	0.7	68	1.4	11		0		18
Lactuca	sativa						leaf	Rubatzky & Yamaguchi (1999)	94.9	0.7	44	1.3	9		0		22
Lactuca	sativa						leaf	World Vegetable Center (2019)		0.41	43	0.99		0.17	0		13	0.68
Lactuca	sativa						leaf	World Vegetable Center (2019)		0.44	44	0.91		0.21	0		8	0.69
Lactuca	sativa						leaf	World Vegetable Center (2019)		0.36	21	0.66		0.12	0		4	0.28
Lactuca	sativa						leaf	Rubatzky & Yamaguchi (1999)	94.5	0.4	39	0.6	28		0		6
Lactuca	sativa						leaf	World Vegetable Center (2019)		0.39	94	0.51		0.19			6	0.49
Lactuca	sativa						leaf	World Vegetable Center (2019)		0.4	28	0.49		0.15			5	0.18
Lactuca	sativa						leaf	World Vegetable Center (2019)		0.41	27	0.39		0.14			8	0.28
Lactuca	sativa						leaf	World Vegetable Center (2019)		0.42	1	0.1		0.07			0.38
Lactuca	sativa	lettuce	annual	herb	forb		leaf		95.037	0.702632	37.4211	1.01526	12.9	0.170714	0	62.4	8.72526	0.362308
Lagenaria	siceraria						unripe fruit	World Vegetable Center (2019)		0.69	7	0.3			0		5
Lagenaria	siceraria						unripe fruit	USDA (2019)	95.54	0.5	26	0.2	11	0.7	0	6	10.1
Lagenaria	siceraria						unripe fruit	World Vegetable Center (2019)		0.34	17	0.77		0.1	0		12	0.06
Lagenaria	siceraria						unripe fruit	World Vegetable Center (2019)		0.39	25	0.69		0.57			15	0.08
Lagenaria	siceraria						unripe fruit	Rubatzky & Yamaguchi (1999)	94.7	0.5	23	0.5	11		0		12
Lagenaria	siceraria						unripe fruit	World Vegetable Center (2019)		0.38	24.5	0.28		0.06			20	0.03
Lagenaria	siceraria						unripe fruit	World Vegetable Center (2019)		0.41	17	0.26		0.16			12	0.08
Lagenaria	siceraria						unripe fruit	World Vegetable Center (2019)		0.39	8			0.1			5	0.14
Lagenaria	siceraria						unripe fruit	World Vegetable Center (2019)		0.67	11			0.07			4	0.06
Lagenaria	siceraria	bottle gourd	annual	vine	herbaceous		unripe fruit		95.12	0.474444	17.6111	0.428571	11	0.251429	0	6	10.5667	0.075
Lathyrus	japonicus						unripe seed	Kuhnlein & Turner (1991)	68
Lathyrus	japonicus	beach pea	perennial	vine	herbaceous		unripe seed		68
Lemna	minor						leaf	Duke & Atchley (1986)	93		141.998				0		4.998
Lemna	minor	duckweed	perennial	herb	forb	aquatic	leaf		93		141.998				0		4.998
Lemna	spp.						leaf	feedipedia	94.4	0.73	113.68	30.27		0.94
Lemna	spp.	duckweed	perennial	herb	forb	aquatic	leaf		94.4	0.73	113.68	30.27		0.94
Lepidium	sativum						leaf	Rubatzky & Yamaguchi (1999)	88.2	1.1	179	2.5			0		73
Lepidium	sativum	cress	annual	herb	forb		leaf		88.2	1.1	179	2.5					73
Leptadenia	lancifolia						leaf	Grubbe & Denton (2004)	81	4.7	417				0		78
Leptadenia	lancifolia						leaf	Mineral contents of selected edible plants of Niger			214	2.11	56.6
Leptadenia	lancifolia	leptadenia	perennial	vine	herbaceous		leaf		81	4.7	417				0		78
Leucaena	esculenta						unripe seed	Villasana, Solano, Martinez, Carrillo, Gonzalez, Curiel, Sanchez-Castillo & Romo (2014)	75.4	1.8	158	3.8			0.008		40
Leucaena	esculenta						unripe seed	Componentes Nutricionales y Antioxidantes de Dos Especies de Guaje; % water based on cajanus	68.5	3.32	46.57	0.89	54.9	0.82
Leucaena	esculenta	guaje	perennial	woody	tree		unripe seed		71.95	2.56	102.285	2.345	54.9	0.82	0.008		40
Limnocharis	flava						flowerbud	Edible medicinal and Non-Medicinal Plants Volume 7	79.34	3.81	770.87		228.1	0.66
Limnocharis	flava	water lettuce	perennial	herb	forb	aquatic	flowerbud		79.34	3.81	770.87		228.1	0.66
Limnocharis	flava						stem	World Vegetable Center (2019)		2.07	273	0.88		0.33	0	14	60	0.89
Limnocharis	flava	water lettuce	perennial	herb	forb	aquatic	stem			2.07	273	0.88		0.33	0	14	60	0.89
Limnocharis	flava						leaf	Siemonsma & Piluek (1993)				5.2			0
Limnocharis	flava						leaf	Duke & Atchley (1986)	90		62	2.1			0		54
Limnocharis	flava						leaf	Wijaya & Epriliata (2013)			33	2			0		54
Limnocharis	flava	water lettuce	perennial	herb	forb	aquatic	leaf		90		47.5	3.1			0		54
Limnophila	rugosa						leaf	World Vegetable Center (2019)		1.56	175	3.16		0.62	0	7
Limnophila	rugosa						leaf	World Vegetable Center (2019)		2.05	273	13.32		0.9	0	15	29	3.74
Limnophila	rugosa	swamp leaf	perennial	herb	forb	aquatic	leaf			1.805	224	8.24		0.76	0	11	29	3.74
Luffa	actangulata						unripe fruit	Grubbe & Denton (2004)	94.2	1.7	12	0.3			0	37	3
Luffa	acutangula						unripe fruit	Rubatzky & Yamaguchi (1999)	94.6	0.5	18	0.5			0		12
Luffa	acutangula	luffa	annual	vine	herbaceous		unripe fruit		94.4	1.1	15	0.4			0	37	7.5
Luffa	cylindrica						flowerbud	World Vegetable Center (2019)		1.23	58	1.16			0		20	1.11
Luffa	cylindrica	luffa	annual	vine	herbaceous		flowerbud			1.23	58	1.16			0		20	1.11
Luffa	cylindrica						unripe fruit	World Vegetable Center (2019)		0.23	14	0.96		0.43	0		8	0.1
Luffa	cylindrica						unripe fruit	World Vegetable Center (2019)		0.18	13	0.73		0.1	0		8.5
Luffa	cylindrica						unripe fruit	Rubatzky & Yamaguchi (1999)	93.7	1	24	0.7	19		0		10
Luffa	cylindrica						unripe fruit	World Vegetable Center (2019)		0.14	17	0.32		0.07			12	0.1
Luffa	cylindrica						unripe fruit	World Vegetable Center (2019)		0.17	10	0.26		0.16			4	0.13
Luffa	cylindrica						unripe fruit	World Vegetable Center (2019)		0.2	11			0.09			6	0.13
Luffa	cylindrica	luffa	annual	vine	herbaceous		unripe fruit		93.7	0.32	14.8333	0.594	19	0.17	0		8.08333	0.115
Lycium	chinense						leaf	World Vegetable Center (2019)		2.6	194	1.42		0.6	0	76	21	14.9
Lycium	chinense						leaf	Kennedy (2011)				9.5
Lycium	chinense						leaf	Yang, Wang & Pan (2009)	87.8	1.6	36	2.4	74	0.24	0.3		58	2.99
Lycium	chinense						leaf	Rubatzky & Yamaguchi (1999)	88.9	1.4	187	4.3					8
Lycium	chinense						leaf	Duke & Atchley (1986)	90	1.3	1.48002	0.053976			0		7.9976
Lycium	chinense						leaf	Siemonsma & Piluek (1993)	90	1.3	142				0		8
Lycium	chinense	goji	perennial	woody	shrub		leaf		89.175	1.64	112.096	3.5348	74	0.42	0.075	76	20.5995	8.945
Lycium	barbarum						fruit	Duke & Atchley (1986)	77
Lycium	barbarum						fruit	Duke & Atchley (1986)	77
Lycium	barbarum						fruit	"Nutritional evaluation of fresh and dried goji berries"	77.4	2.2	26.6	0.9	12.7	0.5	0
Lycium	barbarum	goji	perennial	woody	shrub		fruit		77.1333	2.2	26.6	0.9	12.7	0.5	0
Malva	moschata						leaf	Kuhnlein & Turner (1991)	80
Malva	moschata	mallow	perennial	herb	forb		leaf		80
Malva	sylvestris						leaf	Duke & Atchley (1986)	92		221	9.704			0
Malva	sylvestris						leaf	Souci, Fachmann & Kraut (2008)	79.6	3.47	505	4.1	82	2.2			178
Malva	sylvestris						leaf	Kuhnlein & Turner (1991)	79		90	3.7			0		24
Malva	sylvestris						leaf	Duke & Atchley (1986)	92	0.8988	89.9976	3.696			0		23.9988
Malva	sylvestris	mallow	A/P	herb	forb		leaf		85.65	2.1844	226.499	5.3	82	2.2	0		75.3329
Malva	verticillata						leaf	World Vegetable Center (2019)		1.04	227	1.6		0.91	0	29	96	0.17
Malva	verticillata						leaf	World Vegetable Center (2019)		0.93	265	2.06		0.79	0	33	97	1.26
Malva	verticillata						leaf	World Vegetable Center (2019)		1.3	264	10.17			0		100	3.95
Malva	verticillata	mallow	annual	herb	forb		leaf			1.09	252	4.61		0.85	0	31	97.6667	1.79333
Manihot	esculenta						leaf	World Vegetable Center (2019)		3.32	403	4.52		1.79	0	95	370	13.06
Manihot	esculenta						leaf	Duke & Atchley (1986)	72	4	303	7.6			0		311
Manihot	esculenta						leaf	Rubatzky & Yamaguchi (1999)	84.2	3.2	297	7.8			0		316
Manihot	esculenta						leaf	Duke & Atchley (1986)	77	2.4	206	2			0		290
Manihot	esculenta						leaf	Duke & Atchley (1986)	81	2.1	144	2.8			0		82
Manihot	esculenta						leaf	Wijaya & Epriliata (2013)	84.4	2.4	99	1.3
Manihot	esculenta	cassava	perennial	woody	shrub		leaf		79.72	2.90333	242	4.33667		1.79	0	95	273.8	13.06
Marsdenia	australis						fruit	Brand & Cherikoff (1985)	71.7	0.7		5.6					4
Marsdenia	australis						fruit	Brand & Cherikoff (1985)	84.7	0.5	17	4	413
Marsdenia	australis						fruit	Brand & Cherikoff (1985)	84.1	0.4	8	1.8	224				9
Marsdenia	australis						fruit	Brand & Cherikoff (1985)	75.2	0.5	22	0.9	31				2
Marsdenia	australis						fruit	Brand & Cherikoff (1985)	83.5	0.4	15	0.6	21
Marsdenia	australis						fruit	Brand & Cherikoff (1985)	77.7	2	22
Marsdenia	australis	Austral doubah	perennial	vine	herbaceous		fruit		79.4833	0.75	16.8	2.58	172.25				5
Matteuccia	struthiopteris						leaf	USDA (2019)	88.68		32	1.31	34	0.83	0		2.26
Matteuccia	struthiopteris	ostrich fern	perennial	herb	forb		leaf		88.68		32	1.31	34	0.83	0		2.26
Melientha	suavis						leaf	Siemonsma & Piluek (1993)	76.6	3.4		3.7			0		115
Melientha	suavis	phakwanupa	perennial	woody	tree		leaf		76.6	3.4		3.7			0		115
Melocanna	baccifera						shoot	Guerrero Wild Edible Plans	84		400		50				12.5
Melocanna	baccifera		perennial	woody	tree		shoot		84		400		50				12.5
Mesymbranthemum	crystallinum						leaf	Rubatzky & Yamaguchi (1999)	94		90	0.6			0		23
Mesymbranthemum	crystallinum	ice plant	perennial	herb	forb		leaf		94		90	0.6			0		23
Metroxylon	sagu						shoot	Dignan, Burlingame, Kumar & Aalbersberg (2004)	91	2.6	68	0.2	37	0.5			2	0.2
Metroxylon	sagu	sago palm	perennial	woody	palm		shoot		91	2.6	68	0.2	37	0.5			2	0.2
Momordica	charantia						unripe fruit	Grubbe & Denton (2004)	94	2.8	19	0.4	17	0.8	0	72	84
Momordica	charantia						unripe fruit	World Vegetable Center (2019)		0.81	25	1.36		0.41	0		54	0.93
Momordica	charantia						unripe fruit	World Vegetable Center (2019)		0.9	16	1		0.63	0		59	0.74
Momordica	charantia						unripe fruit	World Vegetable Center (2019)		0.87	20	0.94		0.13	0		59
Momordica	charantia						unripe fruit	World Vegetable Center (2019)		0.77	20	0.85		0.14	0		38	0.69
Momordica	charantia						unripe fruit	Rubatzky & Yamaguchi (1999)	93.3	1.2	29	0.7	17		0		137
Momordica	charantia						unripe fruit	World Vegetable Center (2019)		0.98	11	0.45			0		75
Momordica	charantia						unripe fruit	World Vegetable Center (2019)		1.03	20	0.41		0.02	0		55
Momordica	charantia						unripe fruit	World Vegetable Center (2019)		0.77	18	0.38		0.13	0		42	1.41
Momordica	charantia						unripe fruit	World Vegetable Center (2019)		0.99	20	0.37		0.03	0		64
Momordica	charantia						unripe fruit	World Vegetable Center (2019)		0.64	19	0.24		0.18	0		31	0.9
Momordica	charantia						unripe fruit	World Vegetable Center (2019)		0.81	19	0.21		0.12			47	0.84
Momordica	charantia						unripe fruit	World Vegetable Center (2019)		0.94	19	0.01		0.12			77	1.87
Momordica	charantia	bitter gourd	annual	vine	herbaceous		unripe fruit		93.65	1.03923	19.6154	0.563077	17	0.246364	0	72	63.2308	1.05429
Momordica	charantia						leaf	Rubatzky & Yamaguchi (1999)	80.1	0.5	264	7.1			0		247
Momordica	charantia						leaf	Rubatzky & Yamaguchi (1999)	89.2	2.28	84	2	85				88
Momordica	charantia	bitter gourd	annual	vine	herbaceous		leaf		84.65	1.39	174	4.55	85		0		167.5
Momordica	cochinchinensis						leaf	World Vegetable Center (2019)		1.29	42	0.95		0.74	0	128	1983	1.42
Momordica	cochinchinensis						leaf	World Vegetable Center (2019)		1.72	227	1.22		0.58	0	155	527	3.54
Momordica	cochinchinensis						leaf	World Vegetable Center (2019)		2.1	759	3.51		0.41	0		296
Momordica	cochinchinensis	gac	perennial	vine	woody		leaf			1.70333	342.667	1.89333		0.576667	0	141.5	935.333	2.48
Momordica	cochinchinensis						unripe fruit	World Vegetable Center (2019)		2.3	48	0.87		0.29	0	6	146	5.1
Momordica	cochinchinensis						unripe fruit	World Vegetable Center (2019)		1.03	23	0.34			0		91
Momordica	cochinchinensis	gac	perennial	vine	woody		unripe fruit			1.665	35.5	0.605		0.29	0	6	118.5	5.1
Momordica	cochinchinensis						fruit	Gac fruit composition and bioactivities							0
Momordica	cochinchinensis						fruit	Gac fruit composition and bioactivities							0
Momordica	cochinchinensis						fruit	Gac fruit composition and bioactivities							0
Momordica	cochinchinensis						fruit	Gac fruit composition and bioactivities							0
Momordica	cochinchinensis						fruit	Gac fruit composition and bioactivities							0
Momordica	cochinchinensis						fruit	Gac fruit composition and bioactivities							0
Momordica	cochinchinensis						fruit	Gac fruit composition and bioactivities							0
Momordica	cochinchinensis						fruit	Gac fruit composition and bioactivities							0
Momordica	cochinchinensis						fruit	Gac fruit composition and bioactivities							0
Momordica	cochinchinensis						fruit	World Vegetable Center (2019)		2.4	20	0.6		0.3	0	9	241	2.94
Momordica	cochinchinensis						fruit	Rubatzky & Yamaguchi (1999)	90.2	1.6	27
Momordica	cochinchinensis						fruit	Duke & Atchley (1986)	84	5.936	33.2	4.624			0		276.736
Momordica	cochinchinensis	gac	perennial	vine	woody		fruit		87.1	3.312	26.7333	2.612		0.3	0	9	258.868	2.94
Momordica	dioica						unripe fruit	Rubatzky & Yamaguchi (1999)	84.1	3	33	4.6
Momordica	dioica						unripe fruit	Duke & Atchley (1986)	84	3.024	21.136	2.624					248.56
Momordica	dioica	kalsa	perennial	vine	herbaceous		unripe fruit		84.05	3.012	27.068	3.612					248.56
Monochoria	vaginalis						leaf	Wu, Rauanheimo, Huang, Narayana & Polacchi (1972)	93		80	3.7					50
Monochoria	vaginalis						leaf	Wu, Rauanheimo, Huang, Narayana & Polacchi (1972)	90		62	2.1					54
Monochoria	vaginalis						leaf	World Vegetable Center (2019)		2.32	76	0.25		0.28	0	19	14	0.51
Monochoria	vaginalis						leaf	World Vegetable Center (2019)		2.69	153	5.23		0.92	0	53	122	10.33
Monochoria	vaginalis						leaf	Siemonsma & Piluek (1993)	88.6		80	5.3			0		30
Monochoria	vaginalis						leaf	World Vegetable Center (2019)		0.61	26	2.08			0		8	0.37
Monochoria	vaginalis	chrach	perennial	herb	forb	aquatic	leaf		90.5333	1.87333	79.5	3.11		0.6	0	36	46.3333	3.73667
Moringa	oleifera						leaf	Kennedy (2011)				6.7	147		0	40
Moringa	oleifera						leaf	World Vegetable Center (2019)		1.12	20	2.2			0	63	204	1.61
Moringa	oleifera						leaf	World Vegetable Center (2019)		1.28	33	2.06			0	72	250	1.86
Moringa	oleifera						leaf	World Vegetable Center (2019)		1.27	30	2.55			0	73	239	1.85
Moringa	oleifera						leaf	World Vegetable Center (2019)		1.73	89	2.95		0.56	0	74	237	1.8
Moringa	oleifera						leaf	World Vegetable Center (2019)		1.54	74	2.57		0.65	0	75	250	1.58
Moringa	oleifera						leaf	World Vegetable Center (2019)		1.67	83	3.77		0.66	0	76	239	1.91
Moringa	oleifera						leaf	World Vegetable Center (2019)		1.09	19	2.74			0	77	177	1.7
Moringa	oleifera						leaf	World Vegetable Center (2019)		1.09	34	2.55			0	79	240	1.34
Moringa	oleifera						leaf	World Vegetable Center (2019)		1.68	59	3.03		0.58	0	82	208	1.36
Moringa	oleifera						leaf	World Vegetable Center (2019)		1.12	19	2.31			0	86	253	1.46
Moringa	oleifera						leaf	World Vegetable Center (2019)		1.52	63	2.98		0.69	0	97	253	1.39
Moringa	oleifera						leaf	World Vegetable Center (2019)		1.53	48	3.08		0.65	0	99	230	1.53
Moringa	oleifera						leaf	Kennedy (2011)				4
Moringa	oleifera						leaf	Wijaya & Epriliata (2013)	75		70	7			0		220
Moringa	oleifera						leaf	Duke & Atchley (1986)	78		97.6864	1.344			0		267.792
Moringa	oleifera						leaf	Rubatzky & Yamaguchi (1999)	75	0.9	472	6.7	147		0		177
Moringa	oleifera						leaf	Siemonsma & Piluek (1993)	75	0.9	440				0		220
Moringa	olerifera						leaf	USDA (2019)	78.66	2	185	4	42	0.6		40	51.7
Moringa	olerifera	moringa	perennial	woody	tree		leaf		76.332	1.36267	107.982	3.47411	112	0.627143	0	73.7857	218.617	1.61583
Moringa	oleifera						unripe fruit	Siemonsma & Piluek (1993)	87	4.8	30	7			0		120
Moringa	oleifera						unripe fruit	Duke & Atchley (1986)	87	4.8678	30.457	5.3865			0		121.828
Moringa	oleifera						unripe fruit	Duke & Atchley (1986)	87	0.4716	230.56	3.668			0		115.28
Moringa	oleifera						unripe fruit	Rubatzky & Yamaguchi (1999)	87.6	3	30	1.3	23		0		120
Moringa	olerifera						unripe fruit	USDA (2019)	88.2	3.2	30	0.36	45	0.45	0	44	141
Moringa	olerifera	moringa	perennial	woody	tree		unripe fruit		87.36	3.26788	70.2034	3.5429	34	0.45	0	44	123.622
Moringa	oleifera						flowerbud	Duke & Atchley (1986)	84	1.264	345.657	6.9046			0		110.173
Moringa	oleifera	moringa	perennial	woody	tree		flowerbud		84	1.264	345.657	6.9046			0		110.173
Morus	alba						leaf	Duke & Atchley (1986)		3.7		18.9		0.3
Morus	alba						leaf	feedipedia	71.6	4.46	778.16	22.21	159.04	3.1
Morus	alba						leaf	Duke & Atchley (1986)	75.8
Morus	alba						leaf	Nutritional Quality of Leaves of Some Genotypes of Mulberry	71.1		380	6.1		0.22	0		160
Morus	alba						leaf	Nutritional Quality of Leaves of Some Genotypes of Mulberry	75.5		786	10.3		1.12	0		280
Morus	alba	mulberry	perennial	woody	tree		leaf		73.5	4.08	648.053	14.3775	159.04	1.185	0		220
Musa	acuminata						flowerbud	Wijaya & Epriliata (2013)			50	0.1
Musa	acuminata	banana	perennial	herb	forb		flowerbud				50	0.1
Musa	spp						flowerbud	Institute of Nutrition (nd)	90.2	3.2	50	1.1		0.3			10
Musa	spp						flowerbud	Siemonsma & Piluek (1993)	90.2		30
Musa	spp	banana & plantain	perennial	herb	forb		flowerbud		90.2	3.2	40	1.1		0.3			10
Nasturtium	officinale						leaf	USDA (2019)	95.11	0.5	120	0.2	21	0.11	0	9	43	1
Nasturtium	officinale						leaf	Souci, Fachmann & Kraut (2008)	93.5	1.47	180	3.1	34		0		96
Nasturtium	officinale						leaf	Kennedy (2011)				0.2			0	9
Nasturtium	officinale						leaf	Duke & Atchley (1986)	89		222.48				0
Nasturtium	officinale						leaf	World Vegetable Center (2019)		0.73	138	3.75		1.08	0		75
Nasturtium	officinale						leaf	Siemonsma & Piluek (1993)	93	0.8	64	2.5			0		45
Nasturtium	officinale						leaf	Duke & Atchley (1986)	92	0.8112	175.789	1.9812			0
Nasturtium	officinale						leaf	Kuhnlein & Turner (1991)	93	0.7	151	1.7			0		44.6
Nasturtium	officinale						leaf	Duke & Atchley (1986)	94	0.8742	93	1.5128			0		73.1042
Nasturtium	officinale						leaf	Duke & Atchley (1986)	94	0.8	64	1.1008					47.4816
Nasturtium	officinale						leaf	Grubbe & Denton (2004)	92.5	1.5	170	1.1			0		62
Nasturtium	officinale						leaf	Siemonsma & Piluek (1993)		1.1	182		2				50
Nasturtium	officinale						leaf	Rubatzky & Yamaguchi (1999)	93.5	0.85	143	1.9	24		0		67
Nasturtium	officinale	watercress	P/A	herb	forb	aquatic	leaf		92.961	0.9214	141.939	1.73135	20.25	0.595	0	9	60.3186	1
Neptunia	oleracea						leaf	Institute of Nutrition (nd)	87.3	4.9	63	4.8		0.4			29
Neptunia	oleracea						leaf	Loukrapah, Rajendram, Chyne & Longvan (2019)	86.3	7.22	142	3.46	61.8	0.95		119	0.321	1.33
Neptunia	oleracea						leaf	Duke & Atchley (1986)	88	1.8	56.004	3.9			0		21
Neptunia	oleracea						leaf	Siemonsma & Piluek (1993)	89.4	1.8	387	2.3	45		0		1.8
Neptunia	oleracea	water mimosa	perennial	herb	forb	aquatic	leaf		87.75	3.93	162.001	3.615	53.4	0.675	0	119	13.0302	1.33
Oenanthe	javanica						leaf	Duke & Atchley (1986)	91	1.2032	112.997	2.9986			0		13.9966
Oenanthe	javanica						leaf	Rubatzky & Yamaguchi (1999)	91.6	1	138	2.3					61
Oenanthe	javanica						leaf	Loukrapah, Rajendram, Chyne & Longvan (2019)	86.8	0.96	159	3.46	86.2	0.93		126	0.07	0.38
Oenanthe	javanica						leaf	Siemonsma & Piluek (1993)	91.6	1	138				0		60.5
Oenanthe	javanica						leaf	World Vegetable Center (2019)		1.25	239	5.87		0.37	0		33
Oenanthe	javanica						leaf	Watanabe & Kawai (2018)	93.4	2.5	34	1.6	24	0.3		110	20	1.6
Oenanthe	javanica						leaf	World Vegetable Center (2019)		0.96	194	4.23			0		19
Oenanthe	javanica	water celery	perennial	herb	forb	aquatic	leaf		90.88	1.2676	145	3.40977	55.1	0.533333	0	118	29.6524	0.99
Oenocarpus	batauta						fruit	Leterme, Bildgen, Estrada & Londono (2006)	81.3		30	1.4	12	0.26
Oenocarpus	batauta	patauá	perennial	woody	palm		fruit		81.3		30	1.4	12	0.26
Olea	europaea						fruit	Duke & Atchley (1986)	78.2	1.3	61	1.6
Olea	europaea						fruit (brined)	USDA (2019)	75.3		52	0.49	11		0	3		3.81
Olea	europaea	olive	perennial	woody	tree		fruit		76.75	1.3	56.5	1.045	11		0	3		3.81
Opuntia	ficus-indica						leaf	USDA (2019)	94.12	2.2	164	0.59	52	0.25	0	3	9.3	0
Opuntia	ficus-indica						leaf	Villasana, Solano, Martinez, Carrillo, Gonzalez, Curiel, Sanchez-Castillo & Romo (2014)	90.1	3.5	87	0.2	53	0.14	0.13		8
Opuntia	ficus-indica						leaf	Villasana, Solano, Martinez, Carrillo, Gonzalez, Curiel, Sanchez-Castillo & Romo (2014)	90.1	0.79	87	0.2	53	0.14	0.13		8
Opuntia	ficus-indica						leaf	Rubatzky & Yamaguchi (1999)	91.9	2.1	110	1.4					21
Opuntia	ficus-indica	nopale cactus	perennial	woody	cactus		leaf		91.555	2.1475	112	0.5975	52.6667	0.176667	0.0866667	3	11.575	0
Opuntia	joconostle						fruit	Villasana, Solano, Martinez, Carrillo, Gonzalez, Curiel, Sanchez-Castillo & Romo (2014)	86.3	2.3	126	0.3			0.002		22
Opuntia	joconostle						fruit	Villasana, Solano, Martinez, Carrillo, Gonzalez, Curiel, Sanchez-Castillo & Romo (2014)	88.5	3.4	126	0.3			0.002		22
Opuntia	joconostle	xoconostle	perennial	woody	cactus		fruit		88.5	3.4	126	0.3			0.002		22
Opuntia	phaecantha						leaf	Phillips, Pehrsson, Agnew, Scheet, Follett, Lukaski & Patterson (2014)	89.22	5.3	180	0.2	69	0.138			11.3
Opuntia	phaecantha	plains prickly pear	perennial	woody	cactus		leaf		89.22	5.3	180	0.2	69	0.138			11.3
Oroxylum	indicum						leaf	World Vegetable Center (2019)		1.29	26	1.26			0		97	4.16
Oroxylum	indicum	Indian trumpet flower	perennial	woody	tree		leaf			1.29	26	1.26			0		97	4.16
Osmunda	japonica						shoot	Standard Food Composition Table Korea	91.1	3.7
Osmunda	japonica						leaf	Watanabe & Kawai (2018)	90.9	3.8	10	0.6	17	0.5		210	24	0.7
Osmunda	japonica						leaf	Rubatzky & Yamaguchi (1999)	88.3	3.8	9	0.8			0		15
Osmunda	japonica	Japanese royal fern	perennial	herb	forb		leaf		89.6	3.76667	9.5	0.7	17	0.5	0	210	19.5	0.7
Oxyria	digyna						leaf	Center for Indigenous People's Nutrition and Environment (n.d.)	86.8		116	3.2	75	0.6			41.57
Oxyria	digyna						leaf	Center for Indigenous People's Nutrition and Environment (n.d.)	87
Oxyria	digyna						leaf	Center for Indigenous People's Nutrition and Environment (n.d.)
Oxyria	digyna						leaf	Kuhnlein & Turner (1991)	87		116	3.2			0		40
Oxyria	digyna	mountain sorrel	perennial	herb	forb		leaf		87		116	3.2	75	0.6	0		40.785
Parkia	speciosa						unripe seed	Siemonsma & Piluek (1993)	71		76	6			0		6
Parkia	speciosa						seed unripe	Institute of Nutrition (nd)	69.9	2.7	101	2.1					28
Parkia	speciosa						unripe seed	Wijaya & Epriliata (2013)			83	1			0
Parkia	speciosa	petai	perennial	woody	tree		unripe seed		70.45	2.7	86.6667	3.03333			0		17
Parkia	speciosa						fruit	Wu, Rauanheimo, Huang, Narayana & Polacchi (1972)	70.7	0.5	76	0.7					6
Parkia	speciosa						fruit	Duke & Atchley (1986)	71	1.3771	43.2175	1.9338					39.3206
Parkia	speciosa	petai	perennial	woody	tree		fruit		70.85	0.93855	59.6088	1.3169					22.6603
Parmentiera	aculeata						fruit	Duke & Atchley (1986)	88	0.2976
Parmentiera	aculeata						fruit	Duke & Atchley (1986)	61	20.8936	101.685	0.9408					8.036
Parmentiera	aculeata	guajilote	perennial	woody	tree		fruit		74.5	10.5956	101.685	0.9408					8.036
Pentarrhinum	insipidum						leaf	Arnold, Wells & Wehmeyer (1985)	85	0.5	370	8.75	78.7
Pentarrhinum	insipidum	African heartvine	perennial	vine	herbaceous		leaf		85	0.5	370	8.75	78.7
Persea	americana						fruit	Duke & Atchley (1986)	80	1.7927	18.9908	1.3987			0		18.0058
Persea	americana						fruit	Villasana, Solano, Martinez, Carrillo, Gonzalez, Curiel, Sanchez-Castillo & Romo (2014)	77.4	3.7	4	0.1	5	0.73	0.01	53	12
Persea	americana						fruit	Villasana, Solano, Martinez, Carrillo, Gonzalez, Curiel, Sanchez-Castillo & Romo (2014)	72.4	0.41	5	0.3	16	0.1	0.0105	53	15
Persea	americana						fruit	Villasana, Solano, Martinez, Carrillo, Gonzalez, Curiel, Sanchez-Castillo & Romo (2014)	77.76	2.25	24	0.55	45	0.64	0.007	62	10
Persea	americana						fruit	Menchu, Mendez, Barrera & Ortega (1996)	73.2	6.7	12	0.55	29	0.64		81	10
Persea	americana						fruit	Souci, Fachmann & Kraut (2008)	66.5	6.3	12	0.49	30	0.65		30	13	1.3
Persea	americana						fruit	Duke & Atchley (1986)	77	1.794	10.005	0.989			0		10.994
Persea	americana						fruit	Duke & Atchley (1986)	84	1.3041	6.0053	0.805			0		16.0034
Persea	americana						fruit	Duke & Atchley (1986)	74		10.0056	0.7128			0		12.9888
Persea	americana						fruit	Duke & Atchley (1986)	81	1.9928	14.006	0.6956			0		16.9952
Persea	americana						fruit	Duke & Atchley (1986)	79	1.008	11.991	0.693					8.001
Persea	americana						fruit	Smith, Thiam & Burlingame (2010)	77.1	4.7	16	1.1	32	0.6	0	42	16	1.6
Persea	americana						fruit	Duke & Atchley (1986)	74	1.612	10.01	0.598					13.988
Persea	americana	avocado	perennial	woody	tree		fruit		76.4123	2.79697	11.8472	0.690931	26.1667	0.56	0.00305556	53.5	13.3059	1.45
Persea	scheiderana						fruit	Menchu, Mendez, Barrera & Ortega (1996)	71.8		11	0.5					11
Persea	schiedeana						fruit	Duke & Atchley (1986)	76	2.0003	14.0021	0.5061			0		12.0018
Persea	schiedeana	chinene	perennial	woody	tree		fruit		73.9	2.0003	12.501	0.50305			0		11.5009
Persicaria	barbata						leaf	Loukrapah, Rajendram, Chyne & Longvan (2019)	84.5	4.37	130	7.23	160	0.96		287	22.4	0.89
Persicaria	barbata	yelang	perennial	herb	forb		leaf		84.5	4.37	130	7.23	160	0.96		287	22.4	0.89
Phaseolus	coccineus						unripe seed	Rubatzky & Yamaguchi (1999)	34.2	12.2	61	4.1
Phaseolus	coccineus						unripe seed	Duke & Atchley (1986)	34	12.173	60.9966	4.0796			0		0
Phaseolus	coccineus	runner bean	P/A	vine	herbaceous		unripe seed		34.1	12.1865	60.9983	4.0898			0		0
Phaseolus	coccineus						unripe fruit	Duke & Atchley (1986)	58	1.9182	49.9983	2.5854			0		26.9799
Phaseolus	coccineus	runner bean	P/A	vine	herbaceous		unripe fruit		58	1.9182	49.9983	2.5854			0		26.9799
Phaseolus	lunatus						unripe seed	USDA (2019)	70.24	4.9	34	3.14	58	0.78	0	34	23.4	0.32
Phaseolus	lunatus						unripe seed	Duke & Atchley (1986)	69	5.5125					0
Phaseolus	lunatus						unripe seed	Duke & Atchley (1986)	64	1.7787	33.759	3.0129			0		2.8314
Phaseolus	lunatus						unripe seed	Rubatzky & Yamaguchi (1999)	68.3	1.6	102	2.8	51		0		29
Phaseolus	lunatus						unripe seed	Duke & Atchley (1986)	68	1.7875	52	2.795			0		28.99
Phaseolus	lunatus						unripe seed	Duke & Atchley (1986)	61	1.2384	30.7278	2.709					36.8424
Phaseolus	lunatus	Lima bean	P/A	vine	herbaceous		unripe seed		66.7567	2.80285	50.4974	2.89138	54.5	0.78	0	34	24.2128	0.32
Phaseolus	vulgaris						unripe fruit	USDA (2019)	90.32	2.7	37	1.03	25	0.24	0	33	12.2	0.41
Phaseolus	vulgaris						unripe fruit	USDA (2019)	90.27	3.4	37	1.04	25	0.24	0	37	16.3	0.41
Phaseolus	vulgaris						unripe fruit	Rubatzky & Yamaguchi (1999)	90.9	1.2	50	0.9	34		0		19
Phaseolus	vulgaris	common bean	annual	vine	herbaceous		unripe fruit		90.4967	2.43333	41.3333	0.99	28	0.24	0	35	15.8333	0.41
Phragmites	australis						leaf	Kuhnlein & Turner (1991)	95	1.3	103	0.1					32
Phragmites	australis	common reed	perennial	herb	grasslike		leaf		95	1.3	103	0.1					32
Phyllostachys	pubescens						shoot	Yang, Wang & Pan (2009)
Phyllostachys	pubescens	moso bamboo	perennial	woody	bamboo		shoot
Phyllostachys	spp.						leaf	USDA (2019)	91	2.2	13	0.5	3	1.1	0	7	4	1
Phyllostachys	spp.	bamboo shoots, raw	perennial	woody	bamboo		leaf		91	2.2	13	0.5	3	1.1	0	7	4	1
Physalis	coztomatl						fruit	Villasana, Solano, Martinez, Carrillo, Gonzalez, Curiel, Sanchez-Castillo & Romo (2014)	90.7	1.32	18	0.51	10	0.07	0.032	7.35	23.4
Physalis	coztomatl	coztomatl	perennial	herb	forb		fruit		90.7	1.32	18	0.51	10	0.07	0.032	7.35	23.4
Physalis	ixocarpa						fruit	USDA (2019)	91.63	1.9	7	0.62	20	0.22	0	7	11.7	0.38
Physalis	ixocarpa						fruit	Rubatzky & Yamaguchi (1999)	89	1.9	20	1.8	81		0		10
Physalis	ixocarpa	tomatillo	annual	herb	forb		fruit		90.315	1.9	13.5	1.21	50.5	0.22	0	7	10.85	0.38
Physalis	peruviana						fruit	Duke & Atchley (1986)	83	3.1	10.0035	2.0007			0		48.9915
Physalis	peruviana						fruit	Leterme, Bildgen, Estrada & Londono (2006)	82.2		23	0.09	19	0.28
Physalis	peruviana						fruit	Souci, Fachmann & Kraut (2008)	82.5		12	1.3					28
Physalis	peruviana						fruit	Duke & Atchley (1986)	79	4.8952	7.9969	1.2027			0		43.0018
Physalis	peruviana						fruit	Rubatzky & Yamaguchi (1999)	87.8	2	15	1					9
Physalis	peruviana	goldenberry	perennial	herb	forb		fruit		82.9	3.33173	13.6001	1.11868	19	0.28	0		32.2483
Physalis	spp.						fruit	Kuhnlein & Turner (1991)	85	2.8	10	0.9			0		11
Physalis	spp.	perennial ground cherry	perennial	herb	forb		fruit			2.8	10	0.9			0		11
Piper	auritum						leaf	Menchu, Mendez, Barrera & Ortega (1996)	82.2		257	5.6					60
Piper	auritum						leaf	Villasana, Solano, Martinez, Carrillo, Gonzalez, Curiel, Sanchez-Castillo & Romo (2014)	80.4	2.8	317	4.8			0.336		49
Piper	auritum						leaf	Villasana, Solano, Martinez, Carrillo, Gonzalez, Curiel, Sanchez-Castillo & Romo (2014)	91	0.8	317	4.8			0.336		49
Piper	auritum	hoja santa	perennial	woody	shrub		leaf		84.5333	1.8	297	5.06667			0.336		52.6667
Piper	sarmentosum						leaf	Duke & Atchley (1986)	70	4.6055	601.003	7.5945			0		10.004
Piper	sarmentosum	pepper leaf	perennial	herb	forb		leaf		70	4.6055	601.003	7.5945			0		10.004
Pisonia	umbellifera						leaf	Dignan, Burlingame, Kumar & Aalbersberg (2004)	86	5.4	310	1.3	165	0.4			34
Pisonia	umbellifera	lettuce tree	perennial	woody	tree		leaf		86	5.4	310	1.3	165	0.4			34
Pisium	sativum						unripe fruit	USDA (2019)	88.89	2.6	43	2.08	24	0.27	0	42	60	0.39
Pisum	sativum						unripe fruit	Rubatzky & Yamaguchi (1999)	87.6	1.8	50	1.3	24		0		52
Pisum	sativum	pea	annual	herb	forb		unripe fruit		88.245	2.2	46.5	1.69	24	0.27	0	42	56	0.39
Pisum	sativum						unripe seed	Rubatzky & Yamaguchi (1999)	74.6	2.2	30	1.8	35		0		33
Pisum	sativum	pea	annual	herb	forb		unripe seed		74.6	2.2	30	1.8	35		0		33
Plantago	major						leaf	Wu, Rauanheimo, Huang, Narayana & Polacchi (1972)	81.4		184	1.2					8
Plantago	major						leaf	Souci, Fachmann & Kraut (2008)	83.9		412	4.3	43				88
Plantago	major						leaf	Duke & Atchley (1986)	81		183.991	1.209			0		7.998
Plantago	major	greater plantain	perennial	herb	forb		leaf		82.1		259.997	2.23633			0		34.666
Pluchea	indica						leaf	Wu, Rauanheimo, Huang, Narayana & Polacchi (1972)	86		256	5.6					8
Pluchea	indica						leaf	Wijaya & Epriliata (2013)			49	6			0		30
Pluchea	indica	Indian pluchea	perennial	herb	forb		leaf		86		152.5	5.8			0		19
Polygonum	bistorta						leaf	Souci, Fachmann & Kraut (2008)	85		122	2.4	54	1.2			177
Polygonum	bistorta						leaf	Ernahrung & Forsten (1979)			100	3.9	69
Polygonum	bistorta						leaf	Kuhnlein & Turner (1991)							0		158
Polygonum	bistorta	bistort	perennial	herb	forb		leaf		85		111	3.15	61.5	1.2	0		167.5
Polyscias	fruticosa						leaf	Siemonsma & Piluek (1993)							0
Polyscias	fruticosa						leaf	Siemonsma & Piluek (1993)	82		474	6.2			0		29
Polyscias	fruticosa	ming aralia	perennial	woody	shrub		leaf		82		474	6.2			0		29
Portulaca	oleracea						leaf	Grubbe & Denton (2004)	93.9		65	2	68	0.2	0	12	21
Portulaca	oleracea						leaf	World Vegetable Center (2019)		0.57	118	1.71		0.68	0		6
Portulaca	oleracea						leaf	World Vegetable Center (2019)		0.68	35	1.66			0		13	0.2
Portulaca	oleracea						leaf	World Vegetable Center (2019)		0.5	47	1.07			0		5	0.52
Portulaca	oleracea						leaf	World Vegetable Center (2019)		0.44	36	0.53			0		9	0.69
Portulaca	oleracea	purslane	annual	herb	forb		leaf		93.9	0.5475	60.2	1.394	68	0.44	0	12	10.8	0.47
Psophocarpus	scandens						unripe fruit	Grubbe & Denton (2004)	87		297	0.8
Psophocarpus	scandens	African winged bean	perennial	vine	herbaceous		unripe fruit		87		297	0.8
Psophocarpus	scandens						leaf	Grubbe & Denton (2004)	82		565
Psophocarpus	scandens	African winged bean	perennial	vine	herbaceous		leaf		82		565
Psophocarpus	tetragonobolus						leaf	USDA (2019)	76.85		224	4	8	1.28	0	16	45
Psophocarpus	tetragonobolus						leaf	Grubbe & Denton (2004)	76.9	2.2		2				16	45
Psophocarpus	tetragonobolus						leaf	Duke & Atchley (1986)	79	4.0934	370.01				0
Psophocarpus	tetragonobolus						leaf	Duke & Atchley (1986)	85		133.995	6.195					28.995
Psophocarpus	tetragonobolus						leaf	Rubatzky & Yamaguchi (1999)	76.9	2.5	224	4	8
Psophocarpus	tetragonobolus						leaf	Kennedy (2011)				4			0
Psophocarpus	tetragonobolus	winged bean	P/A	vine	herbaceous		leaf		78.93	2.93113	238.001	4.039	8	1.28	0	16	39.665
Psophocarpus	tetragonobolous						unripe seed	USDA (2019)	87.04		84	1.5	34	0.39	0	66	18.3
Psophocarpus	tetragonobolus						unripe seed	Duke & Atchley (1986)	92	1.7004
Psophocarpus	tetragonobolus	winged bean	P/A	vine	herbaceous		unripe seed		89.52	1.7004	84	1.5	34	0.39	0	66	18.3
Psophocarpus	tetragonobolus						unripe fruit	Grubbe & Denton (2004)	90	1.9	64	4			0		15
Psophocarpus	tetragonobolus						unripe fruit	Rubatzky & Yamaguchi (1999)	90	1.9	64	0.8	34				15
Psophocarpus	tetragonobolus						unripe fruit	World Vegetable Center (2019)		0.93	72	0.35		0.53			19
Psophocarpus	tetragonobolus						unripe fruit	Duke & Atchley (1986)	90	1.596	53.004	0.1995			0		21
Psophocarpus	tetragonobolus	winged bean	P/A	vine	herbaceous		unripe fruit		90	1.5815	63.251	1.33737	34	0.53	0		17.5
Pterocarpus	mildbraedii						leaf	Grubbe & Denton (2004)	85	1.13	72
Pterocarpus	mildbraedii						leaf	Guil-Guerrero (2002)	85	1.1	72	4.8	40	5
Pterocarpus	mildbraedii	padouc blanc	perennial	woody	tree		leaf		85	1.115	72	4.8	40	5
Quisqualis	indica						leaf	Wu, Rauanheimo, Huang, Narayana & Polacchi (1972)	75.4	2	104						70
Quisqualis	indica	rangoon creeper	perennial	vine	woody		leaf		75.4	2	104						70
Raphanus	sativus						unripe fruit	Rubatzky & Yamaguchi (1999)	90.5	1.4	80	2.8			0		69
Raphanus	sativus	radish pod	annual	herb	forb		unripe fruit		90.5	1.4	80	2.8			0		69
Rheum	x cultorum						petiole	Rubatzky & Yamaguchi (1999)	93.3	0.75	130	0.9	21		0		10
Rheum	x cultorum						petiole	Souci, Fachmann & Kraut (2008)	92.7	3.2	66	0.353	11	0.193		0.0025		0.25
Rheum	x cultorum						petiole	Siemonsma & Piluek (1993)	92	0.7
Rheum	x cultorum						petiole	Duke & Atchley (1986)	95	0.702	96.0024	0.8008			0		9.0012
Rheum	x cultorum						petiole	Duke & Atchley (1986)	94	0.7998	59.9974	0.5022			0		16.0022
Rheum	x cultorum						petiole	Kuhnlein & Turner (1991)	95	0.7	96	0.8			0		9
Rheum	x cultorum	rhubarb	perennial	herb	forb		petiole		93.6667	1.14197	89.6	0.6712	16		0	0.0025	11.0009	0.25
Rheum	officinale						petiole	Duke & Atchley (1986)	95	0.6987	51	0.4998					10.0011
Rheum	officinale	rhubarb	perennial	herb	forb		petiole		95	0.6987	51	0.4998					10.0011
Rumex	acetosa						leaf	World Vegetable Center (2019)		0.8	47	0.18		0.33	0	16	18	0.8
Rumex	acetosa						leaf	Souci, Fachmann & Kraut (2008)	89.2	1.95	58	2.1	33	0.58			117
Rumex	acetosa						leaf	World Vegetable Center (2019)		0.8	47	0.18		0.33	0	16	18
Rumex	acetosa						leaf	Rubatzky & Yamaguchi (1999)	92.8	0.82	63	2.8	103		0		62
Rumex	acetosa	sorrel	perennial	herb	forb		leaf		91	1.0925	53.75	1.315	68	0.413333	0	16	53.75	0.8
Rumex	acetosella						leaf	Center for Indigenous People's Nutrition and Environment (n.d.)	88	1.1	57	2.3	31	1.2			33.5
Rumex	acetosella						leaf	Kuhnlein & Turner (1991)	88	1.1					0		33.5
Rumex	acetosella	sheep sorrel	perennial	herb	forb		leaf		88	1.1	57	2.3	31	1.2	0		33.5
Rumex	arcticus						leaf	USDA (2019)	89.7		2	0.8			0		68
Rumex	arcticus						leaf	Kuhnlein & Turner (1991)	90	1.1	2	0.8
Rumex	arcticus	sour dock	perennial	herb	forb		leaf		89.85	1.1	2	0.8			0		68
Rumex	patiencia						leaf	Kuhnlein & Turner (1991)									25.4
Rumex	patiencia	patience dock	perennial	herb	forb		leaf										25.4
Rungia	klossii						leaf	Siemonsma & Piluek (1993)				0.4
Rungia	klossii						leaf	Siemonsma & Piluek (1993)	87.9		272
Rungia	klossii	rungia	perennial	herb	forb		leaf		87.9		272	0.4
Saccharum	edule						flowerbud	Dignan, Burlingame, Kumar & Aalbersberg (2004)	89	3.6	4	1.1	48	1.1			14	1.8
Saccharum	edule						flowerbud	Wijaya & Epriliata (2013)	89	0.7		21					21
Saccharum	edule						flowerbud	Siemonsma & Piluek (1993)	89	0.7	10	21					21
Saccharum	edule						flowerbud	Siemonsma & Piluek (1993)				3.1
Saccharum	edule						flowerbud	Wijaya & Epriliata (2013)				0.4
Saccharum	edule	pitpit	perennial	herb	grasslike		flowerbud		89	1.66667	7	9.32	48	1.1			18.6667	1.8
Sagittaria	latifolia						leaf	Kuhnlein & Turner (1991)			6.5
Sagittaria	latifolia	arrowhead	perennial	herb	forb	aquatic	leaf				6.5
Salix	spp. (pluchra?)						leaf	USDA (2019)	68.7		130	2.6			0		190
Salix	spp. (probably S. pluchra)	willow	perennial	woody	shrub		leaf		68.7		130	2.6			0		190
Salix	arctica						shoot	Center for Indigenous People's Nutrition and Environment (n.d.)	69		188	2.9	8	4.1
Salix	arctica	arctic willow	perennial	woody	shrub		shoot		69		188	2.9	8	4.1
Salix	reticulata						shoot	Center for Indigenous People's Nutrition and Environment (n.d.)	67		267	5.7	167	3.5
Salix	reticulata	snow willow	perennial	woody	shrub		shoot		67		267	5.7	167	3.5
Sauropus	androgynus						leaf	World Vegetable Center (2019)		1.33	40	3.86			0	108	99	4.53
Sauropus	androgynus						leaf	World Vegetable Center (2019)		1.58	150	5.93			0	112	105	6.65
Sauropus	androgynus						leaf	World Vegetable Center (2019)		1.92	358	3.11			0		172	7.57
Sauropus	androgynus						leaf	Rubatzky & Yamaguchi (1999)	79.8	1.9	234	3.1			0		136
Sauropus	androgynus						leaf	Siemonsma & Piluek (1993)	79.8	1.9	234	0.3			0		136
Sauropus	androgynus						leaf	Duke & Atchley (1986)	81		50.996	2.698					82.992
Sauropus	androgynus						leaf	Wijaya & Epriliata (2013)			64	3.1			0		136
Sauropus	androgynus	katuk	perennial	woody	shrub		leaf		80.2	1.726	161.571	3.15686			0	110	123.856	6.25
Sechium	edule						fruit	Menchu, Mendez, Barrera & Ortega (1996)	90.8	1.7	12	0.6		0.74		93	20
Sechium	edule						fruit	Villasana, Solano, Martinez, Carrillo, Gonzalez, Curiel, Sanchez-Castillo & Romo (2014)	87.1	1.9	16	1.7			0.003		12
Sechium	edule						fruit	Villasana, Solano, Martinez, Carrillo, Gonzalez, Curiel, Sanchez-Castillo & Romo (2014)	90.05	1.9	27	1	14	1.62	0.003		8
Sechium	edule						fruit	Grubbe & Denton (2004)	94	1.7	17	2.5			0	93	7.7
Sechium	edule						fruit	USDA (2019)	92.24	1.7	17	0.34	12	0.74	0	93	7.7	0.12
Sechium	edule						fruit	Souci, Fachmann & Kraut (2008)	93.2		14	0.4					17
Sechium	edule						fruit	Wijaya & Epriliata (2013)			25	1			0		18
Sechium	edule						fruit	Duke & Atchley (1986)	94	1.2	18	0.9			0		10.002
Sechium	edule						fruit	Duke & Atchley (1986)	91	0.598	11.9968	0.598			0		20.0008
Sechium	edule						fruit	Duke & Atchley (1986)	92	0.697	12.997	0.5002			0		18.9994
Sechium	edule						fruit	Duke & Atchley (1986)	94	0.5985	16.9974	0.399					13.9992
Sechium	edule						fruit	World Vegetable Center (2019)		0.38	16	0.31					5	0.01
Sechium	edule						fruit	Rubatzky & Yamaguchi (1999)	91.7	0.7	19	0.5	14		0		20
Sechium	edule	chayote	perennial	vine	herbaceous		fruit		91.8264	1.1885	17.1532	0.826708	13.3333	1.03333	0.000666667	93	13.7232	0.065
Sechium	edule						leaf	Menchu, Mendez, Barrera & Ortega (1996)	89.7		58	2.5					16
Sechium	edule						leaf	Duke & Atchley (1986)	88	4.698					0
Sechium	edule						leaf	Duke & Atchley (1986)	90	1.2051	57.9993	2.5029			0		15.9959
Sechium	edule						leaf	Duke & Atchley (1986)	91	0.8008	61.996	1.3992			0		23.9976
Sechium	edule						leaf	World Vegetable Center (2019)		0.81	37	1.06		0.32	0		5
Sechium	edule						leaf	Grubbe & Denton (2004)	90	1.2	58	0.8			0		16
Sechium	edule						leaf	Rubatzky & Yamaguchi (1999)	89.1	3	58						16
Sechium	edule	chayote	perennial	vine	herbaceous		leaf		89.62	1.95232	55.1659	1.65242		0.32	0		15.4989
Sedum	roseum						leaf	Kuhnlein & Turner (1991)	89	0.7	132	0.6			0		64
Sedum	roseum	rhodiola	perennial	herb	forb		leaf		89	0.7	132	0.6			0		64
Senna	obtusifolia						leaf	Wu, Rauanheimo, Huang, Narayana & Polacchi (1972)	76.9	2.6	110	6.4					128
Senna	obtusifolia						leaf	Grubbe & Denton (2004)	79.7	2.3	589	5.9	40		0		113
Senna	obtusifolia	sicklepod	perennial	woody	shrub		leaf		78.3	2.45	349.5	6.15	40		0		120.5
Senna	siamea						leaf	Institute of Nutrition (nd)	70.2	5.8	125	2.4					56
Senna	siamea						leaf	Institute of Nutrition (nd)	83.9		51	0.5					2
Senna	siamea						leaf	World Vegetable Center (2019)		2.02	56	1.58			0		108
Senna	siamea						leaf	Duke & Atchley (1986)	66	3.7152	100.001	5.2976			0		56.0032
Senna	siamea	kassod tree	perennial	woody	tree		leaf		73.3667	3.84507	83.0002	2.4444			0		55.5008
Senna	sophera						leaf	World Vegetable Center (2019)		1.51	202	2.29		0.88	0	135	176	4.77
Senna	sophera	positive bright	perennial	woody	shrub		leaf			1.51	202	2.29		0.88	0	135	176	4.77
Sesbania	grandiflora						flower	World Vegetable Center (2019)		0.95	15	1.11		0.38	0	32	60	0.68
Sesbania	grandiflora						flower	World Vegetable Center (2019)		1.08	11	1.08		0.28	0	38	56	0.75
Sesbania	grandiflora						flower	USDA (2019)	91.58		19	0.84	12		0	102	73
Sesbania	grandiflora						flower	World Vegetable Center (2019)		1.4	28	0.82			0		45	0.26
Sesbania	grandiflora						flower	French (2006)	89			0.6					59
Sesbania	grandiflora						flower	World Vegetable Center (2019)		0.65	11	0.41			0		40	0.21
Sesbania	grandiflora	vegetable humminbird	perennial	woody	tree		flower		90.29	1.02	16.8	0.81	12	0.33	0	57.3333	55.5	0.475
Sesbania	grandiflora						leaf	Institute of Nutrition (nd)	78	7	254	2.4					94
Sesbania	grandiflora						leaf	Longvah, Anantan, Bhaskarachary & Venkaiah (2017)	74.4	8.6	901	4.36	96.94	0.53		120	121	1.77
Sesbania	grandiflora						leaf	French (2006)	82.3			4					60
Sesbania	grandiflora	vegetable humminbird	perennial	woody	tree		leaf		78.2333	7.8	577.5	3.58667	96.94	0.53		120	91.6667	1.77
Sesuvium	portulacastrum						leaf	Duke & Atchley (1986)		0.803	68.002	6.303			0		27.005
Sesuvium	portulacastrum	seaside purslane	perennial	herb	forb		leaf			0.803	68.002	6.303			0		27.005
Sicana	odorifera						unripe fruit	Duke & Atchley (1986)	87	0.7938	30.996	0.6048			0		16.002
Sicana	odorifera	casabanana	perennial	vine	herbaceous		unripe fruit		87	0.7938	30.996	0.6048			0		16.002
Silene	vulgaris						leaf	de Cortes Sanchez-Mata & Tardio (2016)	85.9	4.36	160	1.93	50.4	0.408	0.81	267	25.5	11.32
Silene	vulgaris	bladder campion	perennial	herb	forb		leaf		85.9	4.36	160	1.93	50.4	0.408	0.81	267	25.5	11.32
Solanum	aethiopicum						fruit	World Vegetable Center (2019)		0.89	8	0.75		0.23	0	6	16	0.4
Solanum	aethiopicum						fruit	World Vegetable Center (2019)		1.27	9	1.02			0	10	10	0.24
Solanum	aethiopicum						fruit	World Vegetable Center (2019)		1.53	12	0.59		0.18	0	14	8	0.67
Solanum	aethiopicum						fruit	World Vegetable Center (2019)		2.09	15	0.67		0.15	0	15	9	2.02
Solanum	aethiopicum						fruit	World Vegetable Center (2019)		2.25	22	0.94		0.13	0	19	15	0.71
Solanum	aethiopicum						fruit	World Vegetable Center (2019)		1.5	12	0.65		0.15	0	19	12	0.49
Solanum	aethiopicum						fruit	World Vegetable Center (2019)		1.78	10	1.14		0.26	0	20	12	0.41
Solanum	aethiopicum						fruit	World Vegetable Center (2019)		1.2	21	0.62		0.21	0	23	12	0.63
Solanum	aethiopicum						fruit	World Vegetable Center (2019)		1.63	15	0.56		0.2		29	14	1.05
Solanum	aethiopicum						fruit	World Vegetable Center (2019)		1.65	27	0.57		0.21		35	14	1.18
Solanum	aethiopicum						fruit	World Vegetable Center (2019)		1.92	30	0.57		0.29		50	13	1.75
Solanum	aethiopicum						fruit	Grubbe & Denton (2004)	90.6	0.2	28	6			0		8
Solanum	aethiopicum						fruit	Duke & Atchley (1986)	91	2.0022	28.0026	1.504			0		7.0594
Solanum	aethiopicum						fruit	World Vegetable Center (2019)		1.32	28	0.81		0.19			2
Solanum	aethiopicum	African eggplant	A/P	herb	forb		fruit		90.8	1.51659	18.9288	1.171		0.2	0	21.8182	10.8614	0.868182
Solanum	aethiopicum						leaf	Grubbe & Denton (2004)	82.1	2.4	523				0		67
Solanum	aethiopicum						leaf	Lim (2012b)	85.8	1.76		2.52		0.81	0		44	7.31
Solanum	aethiopicum						leaf	Duke & Atchley (1986)	82	2.3986	523.002	5.9965			0		66.9997
Solanum	aethiopicum	African eggplant	A/P	herb	forb		leaf		83.3	2.1862	523.001	4.25825		0.81	0		59.3332	7.31
Solanum	americanum						leaf	Rubatzky & Yamaguchi (1999)	85		210	6.1					40
Solanum	americanum						leaf	World Vegetable Center (2019)		1.09	217	2.35		0.28	0		62
Solanum	americanum	black nightshade	A/P	herb	forb		leaf		85	1.09	213.5	4.225		0.28	0		51
Solanum	centrale						fruit	Brand & Cherikoff (1985)	61.2
Solanum	centrale	desert raisin	perennial	herb	forb		fruit		61.2
Solanum	chippendalei						fruit	Brand & Cherikoff (1985)	77.8	0.3	67
Solanum	chippendalei						fruit	Brand & Cherikoff (1985)	68.4	0.6	81
Solanum	chippendalei						fruit	Brand & Cherikoff (1985)	78.7	0.6	98
Solanum	chippendalei						fruit	Brand & Cherikoff (1985)	72.9	1.4	130
Solanum	chippendalei						fruit	Brand & Cherikoff (1985)	81.7	0.5
Solanum	chippendalei						fruit	Brand & Cherikoff (1985)	78.2	0.6
Solanum	chippendalei	kangaroo apple	perennial	herb	forb		fruit		76.2833	0.666667	94
Solanum	ellipticum						fruit	Brand & Cherikoff (1985)	86	1.8	35
Solanum	ellipticum	desert raisin	perennial	herb	forb		fruit		86	1.8	35
Solanum	ferox						fruit	World Vegetable Center (2019)		2.9	28	0.92			0		11	0.41
Solanum	ferox	tarong pasai	perennial	herb	forb		fruit			2.9	28	0.92			0		11	0.41
Solanum	lycopersicon						fruit	World Vegetable Center (2019)		0.51	10	0.69		0.19	0	5	40	1.38
Solanum	lycopersicon						fruit	World Vegetable Center (2019)		0.44	8	0.54		0.15	0	5	19	1.16
Solanum	lycopersicon						fruit	USDA (2019)	94.52	1.2	10	0.27	11	0.17	0	15	13.7	0.54
Solanum	lycopersicon						fruit	USDA (2019)	94.78	0.9	5	0.47	8	0.14	0	29	16
Solanum	lycopersicon						fruit	USDA (2019)	95.28	0.7	11	0.49	12	0.28	0	30	9
Solanum	lycopersicon						fruit	World Vegetable Center (2019)		0.53	10	2.28		0.67	0		26	1.92
Solanum	lycopersicon						fruit	World Vegetable Center (2019)		0.49	14	1.03		0.21	0		10	1.09
Solanum	lycopersicon						fruit	World Vegetable Center (2019)		0.48	14	0.93		0.12	0		24	2.85
Solanum	lycopersicon						fruit	World Vegetable Center (2019)		0.4	9	0.81		0.46	0		12	1.65
Solanum	lycopersicon						fruit	Rubatzky & Yamaguchi (1999)	93.5	0.5	12	0.5	14		0		25
Solanum	lycopersicon						fruit	Duke & Atchley (1986)	93.5	0.5	13	0.5			0		23
Solanum	lycopersicon						fruit	World Vegetable Center (2019)		0.48	6	0.32		0.2	0		19	1.34
Solanum	lycopersicon						fruit	World Vegetable Center (2019)		0.48	5	0.29		0.18	0		42	3.58
Solanum	lycopersicon						fruit	World Vegetable Center (2019)		0.47	12	0.25		0.06	0		21	0.8
Solanum	lycopersicon						fruit	World Vegetable Center (2019)		0.34	11	0.23		0.06	0		14	0.83
Solanum	lycopersicon						fruit	World Vegetable Center (2019)		0.72	10	0.14		0.1	0		16	1
Solanum	lycopersicon						fruit	World Vegetable Center (2019)		0.44	58			0.06	0		22	1.03
Solanum	lycopersicon	tomato	P/A	herb	forb		fruit		94.316	0.563529	12.8235	0.60875	11.25	0.203333	0	16.8	20.6882	1.47462
Solanum	macrocarpon						fruit	World Vegetable Center (2019)		1.73	15	1		0.25		23	27	0.62
Solanum	macrocarpon						fruit	Duke & Atchley (1986)	89	1.496	13.002
Solanum	macrocarpon						fruit	World Vegetable Center (2019)		1.14	7	0.36					11
Solanum	macrocarpon						fruit	Siemonsma & Piluek (1993)	89	1.5	13
Solanum	macrocarpon						fruit	Rubatzky & Yamaguchi (1999)	89	1.5	13				0
Solanum	macrocarpon						fruit	Rubatzky & Yamaguchi (1999)	89		24	0.6	40				12
Solanum	macrocarpon	gboma eggplant	P/A	herb	forb		fruit		89	1.4732	14.167	0.653333	40	0.25	0	23	16.6667	0.62
Solanum	macrocarpon						leaf	Duke & Atchley (1986)	86	1.5984	391.003
Solanum	macrocarpon						leaf	Siemonsma & Piluek (1993)	85.6	1.6	391	0.3
Solanum	macrocarpon						leaf	Rubatzky & Yamaguchi (1999)	86	1.6	391
Solanum	macrocarpon	gboma eggplant	P/A	herb	forb		leaf		85.8667	1.59947	391.001	0.3
Solanum	melongena						fruit	World Vegetable Center (2019)		0.9	9	0.93			0	5	13	0.03
Solanum	melongena						fruit	USDA (2019)	92.3	3	9	0.23	14	0.16	0	22	2.2	0.3
Solanum	melongena						fruit	World Vegetable Center (2019)		0.72	26	1.14		0.2			3	0.05
Solanum	melongena						fruit	World Vegetable Center (2019)		0.97	21	0.87		0.19			6	0.03
Solanum	melongena						fruit	Rubatzky & Yamaguchi (1999)	91.8	1.05	18	0.8	16		0		6
Solanum	melongena						fruit	Duke & Atchley (1986)	92.4	0.9	12	0.7			0		5
Solanum	melongena						fruit	World Vegetable Center (2019)		0.72	14	0.64		0.42			4	0.06
Solanum	melongena						fruit	World Vegetable Center (2019)		1.17	7			0.05			6	0.16
Solanum	melongena	eggplant	P/A	herb	forb		fruit		92.1667	1.17875	14.5	0.758571	15	0.204	0	13.5	5.65	0.105
Solanum	pimpinellifolium						fruit	Rubatzky & Yamaguchi (1999)	93.2	0.4	29	1.7			0		50
Solanum	pimpinellifolium	currant tomato	P/A	herb	forb		fruit		93.2	0.4	29	1.7			0		50
Solanum	scabrum						leaf	World Vegetable Center (2019)		1.08	206	3.89		0.93	0	58	132	2.08
Solanum	scabrum						leaf	World Vegetable Center (2019)		0.83	183	2.16			0	81	119	2.62
Solanum	scabrum						leaf	Grubbe & Denton (2004)	87.8	2.2	200	4.6			0		24
Solanum	scabrum	black nightshade	P/A	herb	forb		leaf		87.8	1.37	196.333	3.55		0.93	0	69.5	91.6667	2.35
Solanum	torvum						fruit	Duke & Atchley (1986)	85	6.1028	103.996	4.599			0		4.0004
Solanum	torvum						fruit	Institute of Nutrition (nd)	80.9	13.6	182	0.9		0.2			18
Solanum	torvum						fruit	Loukrapah, Rajendram, Chyne & Longvan (2019)	74.3	15.3	72.2	1.12	36.2	0.71		327	5.95	0.77
Solanum	torvum						fruit	Wu, Rauanheimo, Huang, Narayana & Polacchi (1972)	85.4	6.1	104	4.6					4
Solanum	torvum						fruit	Wijaya & Epriliata (2013)	89		30	2			0		80
Solanum	torvum						fruit	Rubatzky & Yamaguchi (1999)	89		50	2			0		80
Solanum	torvum						fruit	World Vegetable Center (2019)		7.17	82	0.98			0		15	0.7
Solanum	torvum						fruit	Siemonsma & Piluek (1993)	85.4	6.1	104	0.8			0		4
Solanum	torvum	pea eggplant	perennial	woody	shrub		fruit		84.1429	9.06213	91.0245	2.12488	36.2	0.455	0	327	26.3688	0.735
Solanum	villosum						leaf	World Vegetable Center (2019)		1.31	175	3.26		0.8	0	61	79	2.14
Solanum	villosum	red-fruited nightshade	P/A	herb	forb		leaf			1.31	175	3.26		0.8	0	61	79	2.14
Sonchus	oleraceus						leaf	Grubbe & Denton (2004)	87	3.3	32	3.8	76	0.8	0		78
Sonchus	oleraceus						leaf	Kuhnlein & Turner (1991)	88		93	3.1			0		0.5
Sonchus	oleraceus	sow-thistle	annual	herb	forb		leaf		87.5	3.3	62.5	3.45	76	0.8	0		39.25
Sonneratia	caseolaris						fruit	Siemonsma & Piluek (1993)	80	5.7	40	0.9
Sonneratia	caseolaris	mangrove apple	perennial	woody	mangrove	aquatic	fruit		80	5.7	40	0.9
Spinacea	oleracea						leaf	USDA (2019)	91.4	2.2	99	2.71	79	0.53	0	194	28.1	2.03
Spinacea	oleracea						leaf	Duke & Atchley (1986)	90.7	0.6	93	3.1			0		51
Spinacea	oleracea						leaf	Rubatzky & Yamaguchi (1999)	91.5	0.65	107	2.7	92		0		50
Spinacea	oleracea						leaf	World Vegetable Center (2019)		0.61	90	1.42		0.46	0		34	1.22
Spinacea	oleracea						leaf	World Vegetable Center (2019)		0.72	53	0.6		0.47	0		13	1.87
Spinacea	oleracea	spinach	annual	herb	forb		leaf		91.2	0.956	88.4	2.106	85.5	0.486667	0	194	35.22	1.70667
Suaeda	torreyana						leaf	Villasana, Solano, Martinez, Carrillo, Gonzalez, Curiel, Sanchez-Castillo & Romo (2014)	90.7	1.32	18	0.51	10	0.07	0.032	7.35	23.4
Suaeda	torreyana	romeritos	perennial	herb	forb		leaf		90.7	1.32	18	0.51	10	0.07	0.032	7.35	23.4
Talinum	paniculatum						leaf	World Vegetable Center (2019)		0.76	72	0.94		0.14	0		26
Talinum	paniculatum	verdolaga francesa	perennial	herb	forb		leaf			0.76	72	0.94		0.14	0		26
Talinum	fruticosum						leaf	Wu, Rauanheimo, Huang, Narayana & Polacchi (1972)	92.4	0.6	90	4.8					58
Talinum	fruticosum						leaf	Rubatzky & Yamaguchi (1999)	90.5	0.9	120	5.3					39
Talinum	fruticosum						leaf	World Vegetable Center (2019)		0.73	41	0.99			0		3	1.06
Talinum	fruticosum						leaf	Duke & Atchley (1986)	91	0.9476
Talinum	fruticosum						leaf	Duke & Atchley (1986)	92	0.6232	94.0196	4.3092					42.3092
Talinum	fruticosum						leaf	Duke & Atchley (1986)	90		132.269	0.9894					63.9327
Talinum	fruticosum						leaf	Siemonsma & Piluek (1993)	90.8	1	121						31
Talinum	fruticosum	waterleaf	perennial	herb	forb		leaf		90.86	0.800133	99.7148	3.27772			0		39.5403
Taraxacum	campylodes						leaf	Rubatzky & Yamaguchi (1999)	95.7	1.6	179	3.1	36		0		34
Taraxacum	campylodes						leaf	Ernahrung & Forsten (1979)			50	1.2	23				115
Taraxacum	campylodes						leaf	Souci, Fachmann & Kraut (2008)	89.1	3.02	168	3.4	37	0.83	0		68	2.5
Taraxacum	campylodes						leaf	World Vegetable Center (2019)		2.03	159	1.86		0.39	0	14	28	2.4
Taraxacum	campylodes						leaf	USDA (2019)	85.6	3.5	187	3.1	36	0.41	0	27	35	3.44
Taraxacum	campylodes						leaf	Duke & Atchley (1986)	86	0.5148	603.918	4.2185			0		27.9994
Taraxacum	campylodes						leaf	Kennedy (2011)				3.1	36		0
Taraxacum	campylodes						leaf	de Cortes Sanchez-Mata & Tardio (2016)	83.8	0.9	75.8	5.25	25.5	0.0852			30.2	4
Taraxacum	campylodes						leaf	Duke & Atchley (1986)	86	1.5984	186.998	3.096			0
Taraxacum	campylodes						leaf	Kuhnlein & Turner (1991)	86						0		30
Taraxacum	campylodes	dandelion	perennial	herb	forb		leaf		87.4571	1.88046	201.214	3.14717	32.25	0.4288	0	20.5	46.0249	3.085
Taraxacum	campylodes						flowerbud	Kuhnlein & Turner (1991)	85	1.6	2.9	4.1			0		35
Taraxacum	campylodes	dandelion	perennial	herb	forb		flowerbud		85	1.6	2.9	4.1			0		35
Telfairia	occidentalis						leaf	Duke & Atchley (1986)	86	1.7408							88.6448
Telfairia	occidentalis						leaf	Grubbe & Denton (2004)	86.4			0.8
Telfairia	occidentalis						leaf	Rubatzky & Yamaguchi (1999)	86.4	1.7
Telfairia	occidentalis	fluted gourd	perennial	vine	herbaceous		leaf		86.2667	1.7204		0.8					88.6448
Telosma	cordata						flowerbud	World Vegetable Center (2019)		1.09	28	1.69			0	48	76	2.11
Telosma	cordata						flowerbud	World Vegetable Center (2019)		1.28	34	1.41			0	85	85	2.4
Telosma	cordata						flowerbud	World Vegetable Center (2019)		1.18	19	0.92			0		52
Telosma	cordata	kanjalate	perennial	vine	herbaceous		flowerbud			1.18333	27	1.34			0	66.5	71	2.255
Tetragonia	tetragonioides						leaf	Siemonsma & Piluek (1993)	94		58	5				15	30
Tetragonia	tetragonioides						leaf	USDA (2019)	94	1.5	58	0.8	39	0.38	0	15	30	1.42
Tetragonia	tetragonioides						leaf	World Vegetable Center (2019)		1.05	100	1.5			0	68	39	1.84
Tetragonia	tetragonioides						leaf	Duke & Atchley (1986)	93	2.3998					0
Tetragonia	tetragonioides						leaf	Duke & Atchley (1986)	92	0.799	177.998	3.7995			0		26.996
Tetragonia	tetragonioides						leaf	Duke & Atchley (1986)	92	0.7031	65.0012	3.397			0		30.9996
Tetragonia	tetragonioides						leaf	Duke & Atchley (1986)	93	0.703	58.0012	2.5974			0		29.9996
Tetragonia	tetragonioides						leaf	Duke & Atchley (1986)	93	0.6512	244.067	1.6206			0		23.3692
Tetragonia	tetragonioides						leaf	Rubatzky & Yamaguchi (1999)	93	0.7	60	1.5	40		0		31
Tetragonia	tetragonioides						leaf	World Vegetable Center (2019)		0.93	167	1.29		0.34	0		39
Tetragonia	tetragonioides						leaf	World Vegetable Center (2019)		0.69	60	0.8			0		36	1.43
Tetragonia	tetragonioides						leaf	Kennedy (2011)					39
Tetragonia	tetragonioides	New Zealand spinach	P/A	herb	forb		leaf		93	1.01261	104.807	2.23045	39.3333	0.36	0	32.6667	31.6364	1.56333
Tilia	cordata						leaf	Luske, Meir, Altinalmasiz & Eekeren (n.d.)	65	0.17	158.9	1.7	12.2	0.23
Tilia	cordata						leaf	Luske, Meir, Altinalmasiz & Eekeren (n.d.)
Tilia	cordata	linden	perennial	woody	tree		leaf		65	0.17	158.9	1.7	12.2	0.23
Toona	sinensis						leaf	World Vegetable Center (2019)		2.79	806	9.36			0	28	165	29.32
Toona	sinensis						leaf	World Vegetable Center (2019)			806	9.36			0	28	165	29.32
Toona	sinensis						leaf	Yang, Wang & Pan (2009)	85.2	1.8	96	3.6		2.25	0		40	0.99
Toona	sinensis						leaf	Kennedy (2011)				8.7			0
Toona	sinensis						leaf	Duke & Atchley (1986)	84	1.2956	29.9956	3.198
Toona	sinensis	fragrant spring tree	perennial	woody	tree		leaf		84.6	1.96187	434.499	6.8436		2.25	0	28	123.333	19.8767
Trachyandra	falcata						leaf	Arnold, Wells & Wehmeyer (1985)	84.9	0.5	165	4.2	56.7				96.2
Trachyandra	falcata	hotnotskool	perennial	herb	forb		leaf		84.9	0.5	165	4.2	56.7				96.2
Trichanthera	gigantea						leaf	Leterme, Bildgen, Estrada & Londono (2006)	87.4		972	2.15	180	0.62
Trichanthera	gigantea						leaf	Leterme, Bildgen, Estrada & Londono (2006)	79.4		1136	7.83	164	0.95
Trichanthera	gigantea						leaf	Leterme, Bildgen, Estrada & Londono (2006)	84.3		1242	3.31	202	0.72
Trichanthera	gigantea						leaf	Leterme, Bildgen, Estrada & Londono (2006)	81.7		1080	8.42	153	0.53
Trichanthera	gigantea	nacadero	perennial	woody	shrub		leaf		83.2		1107.5	5.4275	174.75	0.705
Trichosanthes	cucumerina						unripe fruit	Grubbe & Denton (2004)	92.9	1.7	26	0.3				15	0
Trichosanthes	cucumerina						unripe fruit	Rubatzky & Yamaguchi (1999)	94.3	0.8	26	0.8			0		12
Trichosanthes	cucumerina						unripe fruit	World Vegetable Center (2019)		0.58	24	0.44			0		4	0.05
Trichosanthes	cucumerina						unripe fruit	World Vegetable Center (2019)		0.31	12	0.3			0		13	0.03
Trichosanthes	cucumerina	snake gourd	annual	vine	herbaceous		unripe fruit		93.6	0.8475	22	0.46			0	15	7.25	0.04
Trichosanthes	dioica						leaf	Duke & Atchley (1986)	81	4.1925	531.004
Trichosanthes	dioica	parwal	perennial	vine	herbaceous		leaf		81	4.1925	531.004
Trichosanthes	dioica						fruit	Longvah, Anantan, Bhaskarachary & Venkaiah (2017)	91.57	2.61	30.7	0.5	24.5	0.23		19.96	19.24	0.04
Trichosanthes	dioica						fruit	Duke & Atchley (1986)	92	3	30	1.704			0		29
Trichosanthes	dioica						fruit	Rubatzky & Yamaguchi (1999)	92	3	30	1.7					29
Trichosanthes	dioica	parwal	perennial	vine	herbaceous		fruit		92	2.87	30.2333	1.30133	24.5	0.23	0	19.96	25.7467	0.04
Typha	spp						shoot	Yang, Wang & Pan (2009)	95	0.9	53	0.2			0		6
Typha	spp	cattail	perennial	herb	forb	aquatic	shoot		95	0.9	53	0.2			0		6
Typha	angustifolia						leaf	Kuhnlein & Turner (1991)		2.8	69	16.5
Typha	angustifolia						leaf	USDA (2019)	92.65	4.5	54	0.91	63	0.24	0		0.7
Typha	angustifolia	cattail	perennial	herb	forb	aquatic	leaf		92.65	4.5	54	0.91	63	0.24	0		0.7
Typha	latifolia						leaf	Kuhnlein & Turner (1991)	90		51	0.7
Typha	latifolia						leaf	Phillips, Pehrsson, Agnew, Scheet, Follett, Lukaski & Patterson (2014)	92.65	4.5	54	0.91	63	0.245		10.8	1
Typha	latifolia						leaf	Kuhnlein & Turner (1991)	83	5.7	133
Typha	latifolia	cattail	perennial	herb	forb	aquatic	leaf		88.55	5.1	79.3333	0.805	63	0.245		10.8	1
Ulmus	pumila						fruit	Yang, Wang & Pan (2009)	85.2	4.3	62	7.9		3.27	0.06		11	0.54
Ulmus	pumila	elm	perennial	woody	tree		fruit		85.2	4.3	62	7.9		3.27	0.06		11	0.54
unspecified							leaf	USDA (2019)	69.5	1.5	18	1.69	10	3.73	0	24	8	0.5
unspecified		hearts of palm, raw	perennial	woody	palm		leaf		69.5	1.5	18	1.69	10	3.73	0	24	8	0.5
Urtica	dioica						leaf	Center for Indigenous People's Nutrition and Environment (n.d.)	89	1.4	236	1	63	1.9			1.5
Urtica	dioica						leaf	Ernahrung & Forsten (1979)			630	7.8	71		0.06		333
Urtica	dioica						leaf	USDA (2019)	87.67	6.9	481	1.64	57	0.34	0	14
Urtica	dioica						leaf	Souci, Fachmann & Kraut (2008)	83.3	3.11	713	4.1	80	1			333
Urtica	dioica						leaf	Kuhnlein & Turner (1991)		1.4	236		63	1.9			89.8
Urtica	dioica						leaf	de Cortes Sanchez-Mata & Tardio (2016)	82.9	2.96	625	5.39	171	0.839	0.48		285	14.4
Urtica	dioica						leaf	Kuhnlein & Turner (1991)	89	1.4	263		24.1	3
Urtica	dioica	stinging nettle	perennial	herb	forb		leaf		86.374	2.86167	454.857	3.986	75.5857	1.4965	0.18	14	208.46	14.4
Valerianella	locusta						leaf	Rubatzky & Yamaguchi (1999)	93.1	0.8	35	1.7	13				35
Valerianella	locusta	mache	annual	herb	forb		leaf		93.1	0.8	35	1.7	13				35
Vernonia	amygdalina						leaf	Smith, Thiam & Burlingame (2010)	82.8	5.1	162	2.8	58	1.01		62	11	1.64
Vernonia	amygdalina	bitterleaf	perennial	woody	shrub		leaf		82.8	5.1	162	2.8	58	1.01		62	11	1.64
Vernonia	hymenolepis						leaf	World Vegetable Center (2019)		1.44	173	1.8		0.63	0	96	49	0.83
Vernonia	hymenolepis						leaf	Grubbe & Denton (2004)	82.6	1.5	145						51
Vernonia	hymenolepis						leaf	World Vegetable Center (2019)		1.44	173	1.8		0.63	0	96	49	0.9
Vernonia	hymenolepis	sweet bitterleaf	perennial	woody	shrub		leaf		82.6	1.46	163.667	1.8		0.63	0	96	49.6667	0.865
Vicia	faba						unripe fruit	USDA (2019)	72.6	7.5	37	1.55	33	1	0	148	3.7	1.16
Vicia	faba	fava bean	annual	herb	forb		unripe fruit		72.6	7.5	37	1.55	33	1	0	148	3.7	1.16
Vicia	faba						unripe seed	USDA (2019)	81	4.2	22	1.9	38	0.58	0	96	33
Vicia	faba						unripe seed	Rubatzky & Yamaguchi (1999)	75.4	3.1	30	2.1	38		0		33
Vicia	faba	fava bean	annual	herb	forb		unripe seed		78.2	3.65	26	2	38	0.58	0	96	33
Vigna	unguiculata						leaf	World Vegetable Center (2019)		1.59	90	1.33		0.69	0	70	43	0.64
Vigna	unguiculata						leaf	World Vegetable Center (2019)			116	0.93		0.87	0	71	41	0.67
Vigna	unguiculata						leaf	World Vegetable Center (2019)		1.3	90	1.31		1.31	0	82	42	0.78
Vigna	unguiculata						leaf	World Vegetable Center (2019)							0	89	49	0.79
Vigna	unguiculata						leaf	USDA (2019)	89.78		63	1.92	43	0.29		101	36
Vigna	unguiculata						leaf	World Vegetable Center (2019)		1.65	188	2.36		0.73	0	130	93	2.02
Vigna	unguiculata						leaf	World Vegetable Center (2019)		1.81	219	2.75		0.82	0	133	111	2.62
Vigna	unguiculata						leaf	World Vegetable Center (2019)		2.02	218	2.56		0.72	0	142	104	2.28
Vigna	unguiculata						leaf	World Vegetable Center (2019)		1.77	222	2.68		0.68	0	148	98	2.91
Vigna	unguiculata						leaf	World Vegetable Center (2019)		1.78	405	1.42		0.38	0	153	91	7.39
Vigna	unguiculata						leaf	World Vegetable Center (2019)		2.23	568	1.98		0.49	0	163	80	6.74
Vigna	unguiculata						leaf	World Vegetable Center (2019)		2.47	638	2.03		0.2	0	167	76	9.21
Vigna	unguiculata						leaf	World Vegetable Center (2019)		1.23	169	1.84		0.57	0	180	104	2.16
Vigna	unguiculata						leaf	World Vegetable Center (2019)		1.29	392	1.45		0.35	0	234	103	4.2
Vigna	unguiculata	cowpea	annual	vine	herbaceous		leaf		89.78	1.74	259.846	1.88923	43	0.623077	0	133.071	76.5	3.26231
Vigna	unguiculata						unripe fruit	USDA (2019)	86	3.3	65	1	58	0.34	0	53	33	0.49
Vigna	unguiculata						unripe fruit	Grubbe & Denton (2004)	86		65	1	58	0.3	0	53	33
Vigna	unguiculata						unripe fruit	USDA (2019)	87.85	0.4	50	0.47	44	0.37	0	62	18.8
Vigna	unguiculata						unripe fruit	Rubatzky & Yamaguchi (1999)	85.3	1.8	64	1.7	54		0		20
Vigna	unguiculata						unripe fruit	Rubatzky & Yamaguchi (1999)	88.6	1.3	56	1.1	44		0		26
Vigna	unguiculata	cowpea, yardlong bean	annual	vine	herbaceous		unripe fruit		86.75	1.7	60	1.054	51.6	0.336667	0	56	26.16	0.49
Vigna	unguiculata						unripe seed	USDA (2019)	77.2	5	126	1.1	51	1.01	0	168	2.5
Vigna	unguiculata						unripe seed	Grubbe & Denton (2004)	77.2	5	126	1.1	51	1	0	168	2.5
Vigna	unguiculata						unripe seed	Rubatzky & Yamaguchi (1999)	66.8	1.8	29	2.1	51		0		29
Vigna	unguiculata	cowpea	annual	vine	herbaceous		unripe seed		73.7333	3.93333	93.6667	1.43333	51	1.005	0	168	11.3333
Vitis	vinifera						leaf	USDA (2019)	73.32	11	363	2.63	95	0.67	0	83	11.1	2
Vitis	vinifera						leaf	Kennedy (2011)					95		0
Vitis	vinifera	grape	perennial	vine	woody		leaf		73.32	11	363	2.63	95	0.67	0	83	11.1	2
Viola	odorata						flower	Lim (2012c)			15	39	9
Viola	odorata	sweet violet	perennial	herb	forb		flower				15	39	9
Xanthosoma	saggitifolium						leaf	Flach & Rumawas (1996)	87	2	95	1.2					37
Xanthosoma	saggitifolium						leaf	Leterme, Bildgen, Estrada & Londono (2006)	87.7		318	6.42	55	0.57
Xanthosoma	saggitifolium						leaf	Leterme, Bildgen, Estrada & Londono (2006)	89.6		372	2.58	104	0.34
Xanthosoma	saggitifolium						leaf	Leterme, Bildgen, Estrada & Londono (2006)	89		280	0.66	53	0.32
Xanthosoma	saggitifolium						leaf	Melo (2012)		4.5	141	1.9					17.9
Xanthosoma	sagittifolium						leaf	Duke & Atchley (1986)	90	1.5756
Xanthosoma	sagittifolium						leaf	Rubatzky & Yamaguchi (1999)	89.9	2.1	95	2					37
Xanthosoma	sagittifolium	yautia, belembe	perennial	herb	forb		leaf		88.8667	2.5439	216.833	2.46	70.6667	0.41			30.6333
Xanthosoma	sagittifolium						leaf	Rubatzky & Yamaguchi (1999)	89.5	3.2	49	0.3			0		49
Xanthosoma	sagittifolium						leaf	Duke & Atchley (1986)	90	0.294	4.7145	0.2625			0		2.3625
Xanthosoma	sagittifolium	yautia, belembe	perennial	herb	forb		leaf		89.75	1.747	26.8573	0.28125			0		25.6812
Yucca	aloifolia						flower	Villasana, Solano, Martinez, Carrillo, Gonzalez, Curiel, Sanchez-Castillo & Romo (2014)	78.2	1.21	47	0.5	24	0.33	0.038	0.9	15
Yucca	aloifolia						flower	Villasana, Solano, Martinez, Carrillo, Gonzalez, Curiel, Sanchez-Castillo & Romo (2014)	68.7	1.06	15.53	0.27	21.35	0.34	0.00097	27.81	20.39
Yucca	aloifolia	izote	perennial	woody	succulent		flower		73.45	1.135	31.265	0.385	22.675	0.335	0.019485	14.355	17.695
Yucca	gigantea						flower	Menchu, Mendez, Barrera & Ortega (1996)	83.2		34	1.4					393
Yucca	gigantea	izote	perennial	woody	succulent		flower		83.2		34	1.4					393
Zea	mays						unripe seed	USDA (2019)	75.96	2.7	2	0.52	37	0.45	0	0.055	6.8	0.07
Zea	mays						unripe seed	USDA (2019)	76.05	2	2	0.52	37	0.46	0	42	6.8	0.07
Zea	mays						unripe seed	Rubatzky & Yamaguchi (1999)	75.3	0.75	35	1.1	45				12
Zea	mays	sweet corn	annual	herb	grasslike		unripe seed		75.77	1.81667	13	0.713333	39.6667	0.455	0	21.0275	8.53333	0.07
Zingiber	mioga						shoot	Watanabe & Kawai (2018)	97.1	1.1	11	0.3	7	0.3		13	1	0.4
Zingiber	mioga	mioga ginger	perennial	herb	forb		shoot		97.1	1.1	11	0.3	7	0.3		13	1	0.4
Zingiber	mioga						flowerbud	Watanabe & Kawai (2018)	95.6	2.1	25	0.5	30	0.4		25	2	1.4
Zingiber	mioga						flowerbud	Duke & Atchley (1986)	94	1.6994	33.002	0.5974			0		4.9996
Zingiber	mioga	mioga ginger	perennial	herb	forb		flowerbud		94.8	1.8997	29.001	0.5487	30	0.4	0	25	3.4998	1.4
Zizania	latifolia						leaf	Watanabe & Kawai (2018)	93.5	2.3	2	0.2	8	0.2		43	6	0
Zizania	latifolia						leaf	Rubatzky & Yamaguchi (1999)	92.6	1	5	0.6					2
Zizania	latifolia						leaf	Siemonsma & Piluek (1993)	78.5		21						2
Zizania	latifolia	Manchurian water rice	perennial	herb	grasslike	aquatic	leaf		88.2	1.65	9.33333	0.4	8	0.2		43	3.33333	0

## Sheet: Reference Crops
Reference Vegetables
Genus	Species	Common Name	Life Cycle	Form	Aquatic	Part	Category	Data Points	Water	Fiber	Calcium	Iron mg/100g	Magnesium	Zinc	Carotene (A)	Folate (B9)	Ascorbic Acid (C) mg/100g	E
									%	%	mg/100g	mg/100g	mg/100g	mg/100g	mg RAE	micrograms (ug)/100gm	mg/100g	mg/100gm
Abelmoschus	esculentus	okra	A/P	herb/woody	no	unripe fruit	reproductive	13	88.48	1.06992	69.3074	0.955338	51.5	0.41	0.0240875	34.75	31.0002	0.44625
Allium	ampeloprasum	leek	A/P	herb	no	shoot	vegetative	5	84.7167	1.94516	59.9347	1.523	23.3667	0.436	0.0730042	145	13.786	0.05
Allium	fistulosum	scallion	A/P	herb	no	shoot	vegetative	7	91	1.08333	70.8571	1.46333	23	0.342	0.0336667	16	30.8571	0.225
Asparagus	officinalis	asparagus	perennial	herb	no	shoot	vegetative	9	92.42	0.959856	22.8004	1.11756	16.3333	0.468	0.0410583	80	24.845	1.565
Brassica	oleracea	broccoli	annual	herb	no	flowerbud	reproductive	7	89.65	1.26714	54.4429	1.04714	24	0.558333	0.0703213	71	94.1714	0.88
Brassica	oleracea	cabbage	annual	herb	no	head	vegetative	13	91.7125	1.15462	48.2846	0.735833	17.7143	0.266667	0.0199771	49.5	46.6615	0.2025
Brassica	oleracea	cauliflower	annual	herb	no	flowerbud	reproductive	8	91	1.355	26	0.85	18.3333	0.368571	0.00329865	57	85.6625	0.16345
Brassica	oleracea	kale & collards	A/P	herb	no	leaves	vegetative	10	87.56	1.605	238.7	1.551	51.75	0.32125	0.263594	99.3333	91.33	1.51
Brassica	rapa	pak choi & Chinese cabbage	annual	herb	no	leaves	vegetative	34	93.2375	0.698286	136.328	1.23139	23.8571	0.229677	0.183361	73.8571	55.2571	0.845769
Capsium	annuum	pepper	A/P	herb/woody	no	fruit	reproductive	17	87.6911	1.33842	17.4948	1.12981	17.3333	0.244615	0.114079	24.3333	116.795	2.12091
Cucumis	sativus	cucumber	annual	vine	no	fruit	reproductive	12	95.8333	0.404167	22.5167	0.709091	12.6667	0.233	0.00967632		10.9	0.112222
Cucurbita	spp.	summer squash & zucchini	annual	vine	no	fruit	reproductive	5		0.855	19	0.466667	18.5	0.29	0.00890004	17	14.8667	0.238333
Cucurbita	spp.	winter squash	annual	vine	no	fruit	reproductive	5		1.5925	36.625	0.67875	24.5	0.161667	0.179708	29.25	17.25	1.06
Cynara	scolymus	artichoke	perennial	herb	no	flowerbud	reproductive	7	83.6375	3.57573	63.2493	1.33344	42.3333	0.49	0.553533	68	7.71733	0.19
Lactuca	sativa	lettuce	annual	herb	no	leaves	vegetative	19	95.037	0.702632	37.4211	1.01526	12.9	0.170714	0.118459	62.4	8.72526	0.362308
Persea	americana	avocado	perennial	woody	no	fruit	reproductive	7	76.4123	2.79697	11.8472	0.690931	26.1667	0.56	0.0139629	53.5	13.3059	1.45
Phaseolus	vulgaris	string bean	A/P	vine	no	fruit	reproductive	3	90.4967	2.43333	41.3333	0.99	28	0.24	0.0224667	35	15.8333	0.41
Pisum	sativum	pea	annual	vine	no	unripe fruit	reproductive	1	88.245	2.2	46.5	1.69	24	0.27	0.0373	42	56	0.39
Solanum	lycopersicon	tomato	A/P	herb	no	fruit	reproductive	16	94.316	0.563529	12.8235	0.60875	11.25	0.203333	0.0599443	16.8	20.6882	1.47462
Solanum	melongena	eggplant	A/P	herb	no	fruit	reproductive	8	92.1667	1.17875	14.5	0.758571	15	0.204	0.000914594	13.5	5.65	0.105
Spinacea	oleracea	spinach	annual	herb	no	leaves	vegetative	5	91.2	0.956	88.4	2.106	85.5	0.486667	0.362301	194	35.22	1.70667
Zea	mays	sweet corn	annual	herb	no	unripe seed	reproductive	3	75.77	1.81667	13	0.713333	39.6667	0.455	0.005825	21.0275	8.53333	0.07
								Minimum		0.404167	11.8472	0.466667	11.25	0.161667	0.000914594	13.5	5.65	0.05
								Maximum		3.57573	238.7	2.106	85.5	0.56	0.553533	194	116.795	2.12091
								Spread		3.17156	226.853	1.63933	74.25	0.398333	0.552619	180.5	111.145	2.07091
										Fiber	Calcium	Iron mg/100g	Magnesium	Zinc	Carotene (A)	Folate (B9)	Ascorbic Acid (C) mg/100g	E
							From zero to	Very Low (min)		0	0	0	0	0	0	0	0	0
							to lowest part of range	Very Low (max)		0.394167	11.8372	0.456667	11.24	0.151667	-0.00908541	13.49	5.64	0.04
						1	1-33%	Low (min)		0.404167	11.8472	0.466667	11.25	0.161667	0.000914594	13.5	5.65	0.05
						2	1-33%	Low (max)		1.45078	86.7086	1.00765	35.7525	0.293117	0.183279	73.065	42.3279	0.7334
						3	34-66%	Med (min)		1.46078	86.7186	1.01765	35.7625	0.303117	0.193279	73.075	42.3379	0.7434
						4	34-66%	Med (max)		2.4974	161.57	1.54863	60.255	0.424567	0.365643	132.63	79.0058	1.4168
						5	66-100%	High (min)		2.5074	161.58	1.55863	60.265	0.434567	0.375643	132.64	79.0158	1.4268
						6	66-100%	High (max)		3.57573	238.7	2.106	85.5	0.56	0.553533	194	116.795	2.54
						7	100-200%	Very High		3.58573	238.71	2.116	85.51	0.57	0.563533	194.01	116.805	2.55
						8	100-200%	Very High		7.15145	477.4	4.212	171	1.12	1.10707	388	233.59	5.08
						9	201%+	Extremely High		7.16145	477.41	4.222	171.01	1.13	1.11707	388.01	233.6	5.09
WINTER SQUASH
Cucurbita	maxima		annual	vine		fruit			88	2.37	11.5	0.565	19	0.205	0.0408085	14	10	0.68
Cucurbita	moschata		annual	vine		fruit			86.4	2	48	0.7	34	0.15	0.5315	27	21	1.44
Cucurbita	pepo		annual	vine		fruit			89.59	1.35	27.5	0.75	21	0.13	0.049175	17	10
Cucurbita	spp		annual	vine		fruit			93.65	0.65	59.5	0.7	24		0.09735	59	28
AVERAGE										1.5925	36.625	0.67875	24.5	0.161667	0.179708	29.25	17.25	1.06
SUMMER SQUASH
Cucurbita	maxima		annual	vine		unripe fruit				0.69	20	0.57			0.00497512	10	8	0.47
Cucurbita	pepo		annual	vine		unripe fruit			94.145	0.825	19	0.435	18.5		0.012975		18.45	0.12
Cucurbita	spp.		annual	vine		unripe fruit			94.45	1.05	18	0.395	18.5	0.29	0.00875	24	18.15	0.125
AVERAGE										0.855	19	0.466667	18.5	0.29	0.00890004	17	14.8667	0.238333
