# Supplementary material for: Perennial vegetables: A neglected resource for biodiversity, carbon sequestration, and nutrition
Source: PLoS One. 2020 Jul 10;15(7):e0234611. doi: 10.1371/journal.pone.0234611 (PMC7351156; doi:10.1371/journal.pone.0234611)
Supplement: S1 Table — An inventory of 613 cultivated perennial vegetable species with form, part used, and climate suitability. (XLSX) [file pone.0234611.s001.xlsx]

## Sheet: species
Perennial vegetables: A neglected resource for biodiversity, carbon sequestration, and nutrition
Eric Toensmeier, Rafter Ferguson, Mamta Mehra
Supporting materials: Inventory of cultivated perennial vegetables
TAXONOMY	TAXONOMY	TAXONOMY	FORM & HABIT	FORM & HABIT	FORM & HABIT	CROP INFO	CROP INFO	LEAF VEG USES	LEAF VEG USES	LEAF VEG USES	FRUIT VEG USES	FRUIT VEG USES	FRUIT VEG USES	FRUIT VEG USES	THERMAL CLIMATE	THERMAL CLIMATE	THERMAL CLIMATE	THERMAL CLIMATE	THERMAL CLIMATE	THERMAL CLIMATE	THERMAL CLIMATE	MOISTURE	MOISTURE	MOISTURE	MOISTURE	MOISTURE	MOISTURE	SUN & SHADE	SUN & SHADE	SUN & SHADE
Latin Name	English Name	Family	Form	Category	Perennial grown as annual	Cultivation Status	origin	leaf (blade)	shoot (stem and meristem)	other vegetative parts	flowerbud	flower	fruit or pod	green seed	tropics lowland	tropics highland(1500m)	subtropics (zn 9)	warm temperate (zns 7-8)	cold temperate (zns 4-6)	boreal (zns 2-3)	arctic (USDA zone 1)	humid 1000mm+ (40"+)	semi-arid (250-1000mm or 10-40")	arid (under 250mm or 10")	aquatic	wet or wetland	marine	full sun	part shade	full shade
Abelmoschus esculentus	perennial okra	Malvaceae	woody	shrub	yes	global crop	Africa	yes	yes				yes	yes	yes							yes	yes					yes
Abelmoschus manihot	edible hibiscus	Malvaceae	woody	shrub	yes	minor global crop	Pacific, New Guinea	yes	yes						yes		yes					yes						yes
Abelmoschus moschatus	musk mallow	Malvaceae	woody	shrub		minor global crop	Asia, Australia	yes							yes		yes					yes						yes
Acacia caesia	kelle-doukha	Fabaceae	vine	liana		regional crop	S & SE Asia	yes							yes	yes	yes					yes						yes
Acacia pennata	garlic acacia	Fabaceae	woody	shrub		regional crop	S & SE Asia	yes	yes						yes		yes					yes						yes
Acacia victoriae	elegant wattle	Fabaceae	woody	shrub		new crop, historic wild managed	Australia						yes	green seeds	yes		yes	yes					yes	yes				yes
Acalypha caturus	hanjawan	Euphorbiaceae	woody	shrub		regional crop	SE Asia	yes	yes						yes							yes						yes	yes
Acalypha indica	ricinela	Euphorbiaceae	woody	shrub		minor global crop	SE Asia	yes	yes						yes							yes						yes	yes
Acalypha paniculata	panicled copperleaf	Euphorbiaceae	herb	forb		minor global crop	Africa, Asia	yes	yes						yes							yes							yes
Acanthosicyos naudianus	gemsbok cucumber	Cucurbitaceae	vine	herbaceous		new	southern Africa						yes, cooked		yes								yes	yes				yes
Acmella oleracea	spilanthes	Asteraceae	herb	forb	yes	regional crop	Amazonia	yes	yes						yes		yes					yes						yes	yes
Actinidia polygama	silver vine	Actinidiaceae	vine	liana		regional crop - China	Asia						fruit - a spicy kiwi					yes	yes			yes						yes
Adansonia digitata	baobab	Malvaceae	woody	tree		regional crop	Africa	yes							yes							yes	yes	yes				yes
Adenophora triphylla	jandae	Campanulaceae	herb	forb		regional crop - Asia	E. Asia	yes								yes	yes	yes	yes			yes						yes	yes
Aegopodium podagraria	goutweed	Apiaceae	herb	forb		minor global crop	Eurasia	yes	yes								yes	yes	yes	yes		yes						yes	yes	yes
Aframomum citratum	atzoh	Zingiberaceae	herb	forb		regional crop - W. Africa	Africa		yes						yes							yes							yes
Agave inaequidens	lechuguilla	Asparagaceae	woody	woody lily		regional crop - Mexico	Mesoamerica					yes			yes	yes	yes						yes	yes				yes
Allium ampeloprasum	pearl onion	Amaryllidaceae	herb	forb	yes	minor global crop	Eurasia	yes										yes	yes			yes						yes
Allium ampeloprasum var. ampeloprasum	elephant garlic	Amaryllidaceae	herb	forb	yes	minor global crop	Eurasia	yes										yes	yes	yes		yes	yes					yes	yes
Allium ampeloprasum var. babbingtonii	Babbington's leek	Amaryllidaceae	herb	forb	yes	minor global crop	Eurasia	yes		leek						yes		yes	yes			yes	yes					yes	yes
Allium ampeloprasum var. kurrat	kurrat leek	Amaryllidaceae	herb	forb		regional crop - Egypt	Eurasia	yes							yes	yes	yes	yes	yes			yes	yes					yes
Allium ampeloprasum var. porrum	perennial leek	Amaryllidaceae	herb	forb	yes	global crop	Eurasia	yes								yes		yes	yes	yes		yes	yes					yes	yes
Allium canadense	Canada onion	Amaryllidaceae	herb	forb		regional crop - Cuba	N. America, Caribbean	yes							yes	yes	yes	yes	yes	yes		yes	yes					yes	yes
Allium cepa var. aggregatum	shallot, multiplier onion	Amaryllidaceae	herb	forb	yes	minor global crop	Eurasia	yes							yes	yes	yes	yes	yes	yes		yes	yes					yes
Allium cepa var. perutile	ever-ready onion	Amaryllidaceae	herb	forb	yes	regional crop - Britain	Europe	yes										yes	yes			yes						yes
Allium cepa var. proliferum	walking onion	Amaryllidaceae	herb	forb	yes	minor global crop	Eurasia	yes	yes	scallion					yes	yes	yes	yes	yes	yes		yes	yes					yes	yes
Allium chinense	rakkyo	Amaryllidaceae	herb	forb	yes	minor global crop	E. Asia	yes							yes	yes	yes	yes				yes						yes
Allium consanguineum	pharan	Amaryllidaceae	herb	forb		regional crop - India	S. Asia	yes								yes						yes	yes					yes
Allium fistulosum	Welsh onion	Amaryllidaceae	herb	forb	yes	global crop	Eurasia	yes							yes	yes	yes	yes	yes	yes		yes	yes					yes
Allium hookeri	kuan ye jiu	Amaryllidaceae	herb	forb		regional crop - Asia	Asia	yes							yes	yes	yes					yes						yes
Allium macrostemon	long-stamen chive	Amaryllidaceae	herb	forb		regional crop - Asia	Asia	yes								yes		yes	yes			yes	yes					yes
Allium neapolitanum	daffodil garlic	Amaryllidaceae	herb	forb		minor global crop	Mediterranean	yes										yes				yes	yes					yes
Allium nutans	slizun	Amaryllidaceae	herb	forb		regional crop - Siberia	E. Eurasia	yes										yes	yes	yes		yes				yes		yes
Allium sativum var. ophioscorodon	serpent garlic	Amaryllidaceae	herb	forb	yes	minor global	C. Asia		yes		scapes							yes	yes	yes		yes	yes					yes
Allium scorodoprasum	sand leek	Amaryllidaceae	herb	forb		regional	Eurasia		yes									yes	yes	yes		yes	yes					yes	yes	yes
Allium stipitatum	anzur	Amaryllidaceae	herb	forb		experimental	Eurasia	yes										yes	yes				yes					yes
Allium triquetrum	three-cornered leek	Amaryllidaceae	herb	forb		experimental	Mediterranean	yes										yes				yes	yes					yes	yes	yes
Allium tuberosum	garlic chives	Amaryllidaceae	herb	forb		minor global crop	Asia	yes	yes	flowerstem	yes				yes	yes	yes	yes	yes	yes		yes	yes					yes	yes
Allium ursinum	ramsons	Amaryllidaceae	herb	forb		regional crop - Europe	Europe	yes										yes	yes			yes							yes	yes
Allium victorialis	alpine leek	Amaryllidaceae	herb	forb		regional crop - Eurasia	Eurasia	yes										yes	yes	yes		yes						yes	yes	yes
Allium wallichii	dundoo	Amaryllidaceae	herb	forb		regional crop - Nepal	C. Asia	yes								yes						yes						yes
Alocasia macrorrhizos	giant taro	Araceae	herb	forb	yes	minor global crop	India	cooked		cooked petiole					yes		yes					yes						yes	yes
Alocasia odora	oroja de elefante	Araceae	herb	forb		minor global crop	?			petiole*					yes	yes	yes	yes				yes							yes
Alocasia portei	badian	Araceae	herb	forb		regional crop - Philippines	Philippines	cooked		cooked petiole, trunk starch					yes							yes
Alternanthera sessilis	sessile joyweed	Amaranthaceae	herb	forb		regional cop	Old World tropics	yes	yes						yes										yes	yes		yes
Alternanthera sissoo	sissoo spinach	Amaranthaceae	herb	forb		minor global crop	S. America	yes							yes		yes					yes						yes	yes	yes
Amomum dealbatum	guo gu	Zingiberaceae	herb	forb		regional crop - India	Asia				yes				yes	yes	yes	yes				yes						yes	yes	yes
Amorphophallus abyssinicus	kolto	Araceae	herb	forb		regional crop - Ethiopia	Ethiopia	yes							yes							yes							yes
Amorphophallus harmandii	Voodoo Lily	Araceae	herb	forb		regional crop - Vietnam	SE Asia			leaf stalk					yes		yes	yes				yes							yes	yes
Amorphophallus kachinensis	hou mo	Araceae	herb	forb		regional crop - S. China	China	yes							yes	yes	yes					yes							yes
Amorphophallus krausei	Kraus' konjac	Araceae	herb	forb		regional crop - China	Asia	young leaves							yes							yes							yes
Amorphophallus paeoniifolius	elephant yam	Araceae	herb	forb		minor global crop	Asia, Pacific	yes		leaf stalk					yes							yes							yes
Angelica archangelica	purple angelica	Apiaceae	herb	forb	yes	regional crop	Eurasia	yes	yes									yes	yes	yes		yes
Angelica japonica	hama-udo	Apiaceae	herb	forb	yes	regional crop	E. Asia	yes	yes									yes	yes			yes
Angelica keiskei	asitaba	Apiaceae	herb	forb	yes	regional crop	Asia	yes	yes									yes				yes
Anredera cordifolia	Madeira vine	Basellaceae	vine	herbaceous		regional crop	S. America	yes	yes						yes	yes	yes	yes				yes						yes	yes
Aponogeton distachyos	waterblommetje	Aponogetonaceae	aquatic	herb		regional crop - S. Africa	Africa	yes	yes		yes	yes			yes		yes	yes							yes			yes
Arachis villosulicarpa	amendoim bravo	Fabaceae	herb	forb		regional crop	Brazil							underground beans	yes							yes						yes
Aralia cordata	udo	Araliaceae	herb	forb		regional crop	E. Asia		yes									yes	yes	yes		yes						yes	yes
Aralia elata	angelica tree	Araliaceae	woody	tree		regional crop	E. Asia	yes										yes	yes			yes						yes
Archidendron bigeminum	kachlora	Fabaceae	woody	tree		regional crop	S & SE Asia	yes						green seeds	yes							yes						yes
Archidendron jiringa	djenkol tree	Fabaceae	woody	tree		regional crop	S & SE Asia		yes						yes							yes						yes
Argusia argentea	tree heliotrope	Boraginaceae	woody	shrub		regional crop	Asia	yes							yes		yes					yes						yes
Artemisia lactiflora	white mugwort	Asteraceae	herb	forb		minor global crop	Asia		yes								yes	yes	yes	yes		yes	yes					yes	yes
Artemisia princeps	Korean mugwort	Asteraceae	herb	forb		regional crop	E. Asia	yes	yes									yes	yes			yes	yes					yes	yes
Artocarpus altilis	breadfruit	Moraceae	woody	tree		minor global crop	New Guinea	yes					yes		yes							yes						yes
Artocarpus heterophyllus	jakfruit	Moraceae	woody	tree		minor global crop	India	yes					yes		yes		yes					yes						yes
Artocarpus integer	champedak	Moraceae	woody	tree		regional crop	Asia, New Guinea						yes		yes							yes						yes
Artocarpus lachucha	dahu	Moraceae	woody	tree		regional crop - India	S. Asia. SE Asia					male flower-balls	ripe and unripe, cooked		yes							yes						yes
Artocarpus mariannensis	dugdug	Moraceae	woody	tree		regional crop	Pacific						yes		yes							yes						yes
Arundinaria gigantea	river cane	Poaceae	woody	bamboo		minor global crop	Asia		yes								yes	yes	yes			yes						yes	yes
Aspagarus officinalis	asparagus	Asparagaceae	herb	forb		global crop	Eurasia, N. Africa		yes							yes		yes	yes	yes		yes	yes					yes
Aspagragus acutifolius	asparago pungente	Asparagaceae	herb	forb		regional crop - Mediterranean	Mediterranean		yes								yes	yes				yes	yes					yes
Asplenium nidus	bird's nest fern	Aspleniaceae	herb	fern		regional crop	Asia	yes							yes							yes							yes	yes
Asplenium scolopendrium	hart's tongue	Aspleniaceae	herb	fern		historic crop	Europe	young									yes	yes	yes			yes	yes						yes	yes
Asystasia gangetica	creeping foxglove	Acanthaceae	herb	forb		regional crop - Africa	Africa	yes							yes		yes	yes				yes	yes					yes	yes	yes
Asystasia vogeliana	Vogel's asystasia	Acanthaceae	herb	forb		regional crop - Africa	Africa	yes							yes	yes						yes						yes	yes	yes
Atriplex halimus	saltbush, shrubby orach	Amaranthaceae	woody	shrub		regional crop	Africa, Mediterranean	yes								yes	yes	yes				yes	yes	yes				yes
Averrhoa bilimbi	bilimbi	Oxalidaceae	woody	tree		minor global crop	SE Asia						yes		yes		yes					yes						yes	yes
Baccharoides filigera	sweet bitterleaf	Asteraceae	herb	forb		regional crop - Cameroon	Africa	yes								yes						yes						yes
Bactris gasipaes	peach palm	Arecaceae	woody	palm		minor global crop	S. America		yes		yes	yes	yes	yes	yes							yes
Balanites aegyptiaca	balanites	Zygophyllaceae	woody	tree		regional crop	Africa, W. Asia, S. Asia	yes			yes				yes	yes							yes	yes				yes
Bambusa balcooa	bambusa bamboo	Poaceae	woody	bamboo		regional crop - S. Asia	unknown		yes						yes	yes	yes					yes						yes	yes
Bambusa bambos	bambusa bamboo	Poaceae	woody	bamboo		minor global crop	Asia		yes						yes	yes	yes					yes						yes	yes
Bambusa beecheyana	Beechey bamboo	Poaceae	woody	bamboo		minor global crop	Asia		yes						yes	yes	yes					yes						yes	yes
Bambusa blumeana	phai suk	Poaceae	woody	bamboo		minor global crop	Asia		yes						yes	yes	yes					yes						yes	yes
Bambusa burmanica	phai bongnam	Poaceae	woody	bamboo		regional crop - Asia	Asia		yes						yes	yes						yes						yes	yes
Bambusa horsfieldii	mabbu napap	Poaceae	woody	bamboo		regional crop - Java	Java		yes						yes	yes						yes						yes	yes
Bambusa multiplex	bambusa bamboo	Poaceae	woody	bamboo		minor global crop	Asia		yes						yes	yes	yes	yes				yes						yes	yes
Bambusa nutans	idhuli	Poaceae	woody	bamboo		regional crop - Asia	Asia		yes						yes	yes	yes					yes						yes	yes
Bambusa odashimae	ho-ryokutiko	Poaceae	woody	bamboo		regional crop - Asia	Asia		yes						yes	yes						yes						yes	yes
Bambusa oldhamii	oldhamii	Poaceae	woody	bamboo		minor global crop	Asia		yes						yes	yes	yes					yes						yes	yes
Bambusa polymorpha	pharua	Poaceae	woody	bamboo		regional crop - S. Asia	Asia		yes						yes	yes	yes					yes						yes	yes
Bambusa sinospinosa	Chinese thorny bamboo	Poaceae	woody	bamboo		regional crop - China	Asia		yes						yes	yes						yes						yes	yes
Bambusa stenoaurita	bambusa bamboo	Poaceae	woody	bamboo		regional crop - China	Asia		yes						yes	yes						yes						yes	yes
Bambusa textilis	bambusa bamboo	Poaceae	woody	bamboo		minor global crop	Asia		yes						yes	yes	yes	yes				yes						yes	yes
Bambusa tulda	Bengal bamboo	Poaceae	woody	bamboo		regional crop - Asia	Asia		yes						yes	yes	yes					yes						yes	yes
Bambusa tuldoides	punting pole bamboo	Poaceae	woody	bamboo		regional crop - Asia	Asia		yes							yes	yes	yes				yes						yes	yes
Bambusa variostriata	bambusa bamboo	Poaceae	woody	bamboo		regional crop - China	Asia		yes						yes	yes						yes						yes	yes
Bambusa vulgaris	hedge bamboo	Poaceae	woody	bamboo		minor global crop	Asia		yes						yes	yes	yes					yes						yes	yes
Barbarea vulgaris	wintercress	Brassicaceae	herb	forb	yes, some forms annual	minor global	Eurasia	yes			yes					yes	yes	yes	yes	yes	yes	yes	yes					yes
Basella alba	Malabar spinach	Basellaceae	vine	herbaceous	yes	minor global crop	India	yes	yes						yes		yes					yes						yes
Bauhinia malabarica	amli	Fabaceae	woody	tree		regional crop	Asia	yes	yes						yes		yes					yes						yes
Bauhinia purpurea	gairal	Fabaceae	woody	tree		regional crop - India	Asia				yes				yes		yes					yes	yes					yes
Bauhinia variegata	Hong Kong orchid tree	Fabaceae	woody	tree		regional crop - Asia	Asia	yes			yes, excellent	yes	young		yes		yes					yes						yes
Begonia eminii	tschingari-gari	Begoniaceae	herb	forb		regional crop	Africa	yes							yes							yes						yes
Bellis perennis	English daisy	Asteraceae	herb	forb		historic crop	Europe	yes										yes	yes			yes	yes					yes	yes
Belosynapsis moluccana	tali	Commelinaceae	herb	forb		regional crop - New Guinea	SE Asia, New Guinea	yes		yes					yes	yes						yes						yes
Berula erecta	berro Azteca	Apiaceae	aquatic	herb		minor global crop	N. hemisphere	yes, some toxic								yes	yes	yes	yes	yes					yes	yes		yes
Beta vulgaris var. maritima	sea beet	Amaranthaceae	herb	forb		minor global crop	Europe	yes								yes		yes	yes			yes	yes					yes	yes
Beta vulgaris var. vulgaris	perennial chard	Amaranthaceae	herb	forb	yes	minor global crop		yes										yes	yes			yes	yes					yes	yes
Bidens triplinervia	Spanish needed	Asteraceae	herb	forb		minor global crop	Americas	yes							yes	yes	yes					yes	yes					yes	yes
Blighia sapida	akee	Sapindaceae	woody	tree		minor global crop							yes, deadly unripe		yes							yes	yes					yes
Boesenbergia rotunda	Chinese keys	Zingiberaceae	herb	forb		minor global crop	Asia		yes						yes		yes					yes							yes	yes
Brasenia schreiberi	water shield	Cabombaceae	aquatic	herb		regional crop - China	global		yes						yes	yes	yes	yes	yes	yes					yes			yes
Brassica carinata	Ethiopian kale	Brassicaceae	herb	forb	yes	minor global crop	N. Africa	yes							yes	yes	yes					yes	yes					yes
Brassica napus	perennial brassicas	Brassicaceae	herb	forb	yes	minor global crop	hybrid	yes										yes				yes						yes
Brassica oleracea	perennial brassicas	Brassicaceae	herb	forb	yes	minor global crop	Mediterranean, Europe	yes			some					yes		yes	yes			yes						yes
Bromelia alsodes	cuyuya	Bromeliaceae	woody	succulent		regional crop - C. America	Mesoamerica		yes		young flowerstalk				yes							yes	yes					yes
Broussonetia luzonica	anabó	Moraceae	woody	tree		regional crop	Philippines	yes	yes		yes				yes							yes						yes
Bunias orientalis	Turkish rocket	Brassicaceae	herb	forb		minor global crop	Eurasia	yes	yes		yes							yes	yes			yes	yes					yes	yes
Bunium bulbocastanum	earth chestnut	Apiaceae	herb	forb		regional crop - Eurasia	Eurasia	yes										yes	yes			yes						yes	yes
Cajanus cajan	pigeon pea	Fabaceae	woody	shrub	yes	global crop	India							green seeds	yes							yes	yes					yes
Caladium bicolor	caladium	Araceae	herb	forb		regional crop - S. America	Old World tropics	yes							yes	yes	yes	yes				yes							yes	yes
Calamus egregius	rattan	Arecaceae	vine	palm vine		regional crop - China	Asia		yes						yes	yes	yes					yes							yes
Calamus rotang	Common Rattan	Arecaceae	vine	palm vine		minor global crop	India		yes						yes							yes				yes			yes
Calamus simplicifolius	rattan	Arecaceae	vine	palm vine		experimental	China		yes						yes	yes	yes					yes							yes
Calamus tenuis	rattan	Arecaceae	vine	palm vine		experimental	India		yes						yes	yes	yes					yes							yes
Calathea allouia	Guinea arrowroot	Marantaceae	herb	forb		minor global crop	tropical Americas				yes				yes							yes						yes	yes	yes
Campanula latifolia	giant bellfower	Campanulaceae	herb	forb		regional	Europe	yes										yes	yes	yes		yes						yes	yes
Campanula rapunculoides	creeping bellflower	Campanulaceae	herb	forb		regional crop	Europe	yes	yes									yes	yes	yes		yes						yes	yes
Campanula rapunculus	rampion	Campanulaceae	herb	forb	yes	minor global crop		yes										yes	yes			yes						yes	yes
Canarium odontophyllum	dabai	Burseraceae	woody	tree		regional crop - SE Asia	SE Asia						yes mature soaked in water		yes							yes						yes
Canarium schweinfurtii	African elemi	Burseraceae	woody	tree		regional crop - Africa	Africa						yes - boiled and salted, savory		yes							yes						yes
Canavalia africana	savanna canavalia	Fabaceae	vine	liana		minor global	Africa, Asia						young pods	green seeds	yes								yes
Canavalia gladiata	sword bean	Fabaceae	vine	liana		minor global	Africa, Asia						young pods	green seeds	yes	yes						yes	yes					yes
Canna indica	achira	Cannaceae	herb	forb	yes	minor global crop	tropical Americas		yes						yes	yes	yes	yes				yes				yes		yes	yes
Capparis corymbosa	corymbed caper	Capparaceae	woody	shrub		regional crop - Africa	Africa, Asia, Australia	yes				yes			yes							yes	yes					yes
Capparis spinosa	capers	Capparaceae	woody	shrub		minor global crop	Eurasia, Mediterranean				yes						yes	yes					yes	yes				yes
Capsicum annuum	perennial peppers	Solanaceae	woody	shrub	yes	global crop	Mesoamerica	some					yes		yes							yes	yes					yes
Capsicum baccatum	ají, ulupica	Solanaceae	woody	shrub	yes	minor global crop	S. America						yes		yes	yes						yes	yes					yes
Capsicum chinense	ají, ulupica	Solanaceae	woody	shrub	yes	minor global crop	Americas						yes		yes							yes						yes
Capsicum pubescens	rocoto	Solanaceae	vine	herbaceous	yes	minor global crop	Andes						yes		yes	yes						yes						yes	yes	yes
Cardamine pratensis	cuckoo-flower	Brassicaceae	herb	forb		minor global crop		yes										yes	yes			yes
Cardiocrinum cordatum	uba-yuri	Liliaceae	herb	forb		regional crop - Japan, China	E. Asia	yes										yes	yes			yes							yes
Careya arborea	kumbhi	Lecythidaceae	woody	tree		regional crop - SE Asia	S & SE Asia	yes	yes						yes		yes						yes					yes
Carica monoica	col de montaña	Caricaceae	woody	tree		regional crop - S. America	S. America	yes					yes		yes							yes						yes
Carica papaya	papaya	Caricaceae	woody	tree		global crop	Americas	yes					green		yes		yes					yes						yes
Carica x pentagona	babaco	Caricaceae	woody	tree		minor global crop	Ecuador						green		yes	yes						yes						yes
Carludovica palmata	estococa	Cyclanthaceae	herb	giant		regional crop	tropical Americas		yes				green		yes	yes						yes						yes	yes	yes
Carpobrotus edulis	ice plant	Aizoaceae	herb	succulent		minor global crop	S. Africa	yes							yes	yes	yes	yes					yes	yes				yes	yes
Carpolobia lutea	gibifogoi	Polygalaceae	woody	tree		regional crop	Africa	yes							yes							yes						yes
Caryocar brasiliense	pequi	Caryocaraceae	woody	tree		regional crop	S. America						savory, oily, must be cooked		yes								yes					yes
Caryocar nuciferum	souari-nut	Caryocaraceae	woody	tree		regional crop	S. America						savory, oily, must be cooked		yes							yes						yes
Caryocar villosum	piquia	Caryocaraceae	woody	tree		regional crop	S. America						savory, oily, must be cooked		yes							yes						yes
Caryota mitis	Burmese Fishtail Palm	Arecaceae	woody	palm		regional crop	SE Asia	yes	yes						yes	yes	yes					yes						yes	yes	yes
Caryota urens	Jaggary Palm	Arecaceae	woody	palm		regional crop	SE Asia	yes	yes						yes	yes						yes							yes
Cecropia peltata	abaiba	Urticaceae	woody	tree		regional crop	tropical Americas	buds							yes							yes						yes
Centella asiatica	gotu kola	Apiaceae	herb	forb	yes	minor global crop	pantropic	yes							yes		yes					yes				yes		yes	yes
Ceratopteris cornuta	broadleaf watersprite	Pteridaceae	aquatic	fern		regional crop	Africa to Asia		yes						yes		yes								yes			yes
Ceratopteris thalictroides	water fern	Pteridaceae	aquatic	fern		minor global crop	Old World tropics	yes	yes						yes		yes								yes	yes		yes	yes	yes
Cereus repandrus	Peruvian apple cactus	Cactaceae	woody	cactus		regional crop - Caribbean	tropical Americas			cladodes					yes								yes	yes				yes
Chamaedorea elegans	Parlor Palm	Arecaceae	woody	palm		regional crop - Central America	Central America				yes				yes		yes					yes							yes	yes
Chamaedorea tepejilote	Pacaya	Arecaceae	woody	palm		regional crop - Mexico	Mexico	yes	yes		yes				yes	yes						yes							yes	yes
Chenopodium bonus-henricus	good King Henry	Amaranthaceae	herb	forb		minor global crop	Europe	yes	yes		yes							yes	yes	yes		yes	yes					yes	yes
Chloraea piquichen	shun-ran	Orchidaceae	herb	forb		regional crop - Japan	Japan	yes							yes		yes	yes				yes						yes	yes
Chrysanthemum inducum	Nanking chrysanthemum shoot	Asteraceae	herb	forb	yes	regional crop - China	Asia		yes						yes	yes	yes	yes				yes						yes
Chrysanthemum morifolium	florist's chrysanthemum	Asteraceae	herb	forb	yes	minor global crop	Asia		yes									yes	yes			yes						yes
Cichorium intybus	chicory	Asteraceae	herb	forb	yes	minor global crop	Eurasia	yes										yes	yes	yes		yes	yes					yes
Cirsium oleraceum	cabbage thistle	Asteraceae	herb	forb		regional crop - Japan	Eurasia	yes	yes									yes	yes			yes	yes					yes	yes
Cirsium setidens	Korean thistle	Asteraceae	herb	forb		regional crop	Korea	yes										yes	yes			yes						yes
Cissus gongylodes	cupá	Vitaceae	vine	liana		regional crop	S. America			yes					yes		yes					yes						yes	yes
Cissus javana	kangaroo vine	Vitaceae	vine	liana		regional crop	SE Asia	yes	yes						yes	yes						yes
Claoxylon indicum	chinh hoí	Euphorbiaceae	woody	tree		regional crop	SE Asia	yes							yes		yes					yes						yes
Claoxylon longifolium	ketupuk	Euphorbiaceae	woody	tree		regional crop	SE Asia	yes	yes						yes							yes						yes
Claytonia siberica	Siberian purslane	Montiacae	herb	forb		minor global crop	N. temperate	yes										yes	yes	yes		yes	yes					yes	yes	yes
Cnidoscolus aconitifolius	chaya	Euphorbiaceae	woody	shrub		minor global crop	Mesoamerica	yes							yes	yes	yes					yes	yes					yes
Coccinia grandis	ivy gourd	Cucurbitaceae	vine	herbaceous		minor global crop	Africa, Asia	yes	yes				yes		yes		yes					yes						yes
Coccinia sessilifolia	Kalahari cucumber	Cucurbitaceae	vine	herbaceous		new	Africa						green and ripe		yes		yes						yes					yes	yes
Cochlearia officinalis	scurvy grass	Brassicaceae	herb	forb		historic crop	Atlantic and Med. coasts	yes										yes	yes	yes	yes	yes						yes	yes
Codonopsis lanceolata	todok	Campanulaceae	vine	herbaceous		minor global crop	Asia	yes										yes	yes			yes						yes	yes
Colocasia antiquorum	eddo	Araceae	herb	forb	yes	regional crop - S. China	Asia	yes							yes	yes	yes	yes				yes						yes	yes
Colocasia esculenta	taro	Araceae	herb	forb	yes	global crop	Asia, New Guinea, SE Asia	yes (some)		petiole (some)					yes	yes	yes	yes				yes				yes		yes	yes
Colocasia gigantea	khuun	Araceae	herb	forb (giant)	yes	regional crop - SE Asia	Asia to Australia	yes		petiole					yes	yes	yes					yes						yes	yes
Combretum indicum	rangoon creeper	Combretaceae	vine	liana		minor global crop	Africa, Asia	yes							yes		yes					yes						yes	yes
Commelina benghalensis	géwor	Commelinaceae	herb	forb		regional crop - Java	Asia, Africa, Australia	yes	yes						yes							yes						yes
Commelina cyanea	blue dayflower	Commelinaceae	herb	forb		regional crop - Java	Australia, New Guinea	yes	yes						yes	yes						yes						yes
Commelina diffusa	diffuse dayflower	Commelinaceae	herb	forb		regional crop - Java	Asia, Africa, Australia	yes	yes						yes	yes						yes						yes
Commelina paludosa	marsh dayflower	Commelinaceae	herb	forb		regional crop - Java	Asia, Africa, Australia	yes	yes						yes	yes	yes					yes				yes		yes	yes
Cordia dichotoma	lasora	Boraginaceae	woody	tree		regional crop - India	Asia	yes				yes	green fruit		yes		yes					yes	yes					yes
Cordyline fruticosa	ti	Asparagaceae	woody	woody lily		regional crop - Asia/Pacific	Asia, Pacific		yes						yes							yes						yes
Corydalis turtschaninovii	hyonhosaek	Papaveraceae	herb	forb		regional crop	E. Asia	yes										yes	yes			yes							yes	yes
Crambe maritima	sea kale	Brassicaceae	herb	forb		minor global crop	Europe	yes	yes		yes							yes	yes			yes	yes					yes
Crassocephalum vitellinum	bologi	Asteraceae	herb	forb		regional crop - Zaire	Africa	yes							yes	yes						yes						yes
Crateva nurvala	bila	Capparaceae	woody	tree		regional crop - India	Asia	yes							yes							yes						yes
Crateva religiosa	jaranan	Capparaceae	woody	tree		regional crops	Asia, Pacific	yes							yes							yes
Crithmum maritimum	rock samphire	Apiaceae	herb	forb		regional crop	Europe, Med.	yes										yes	yes			yes	yes					yes
Crotalaria longirostrata	chipilin	Fabaceae	woody	shrub		regional crop	Mesoamerica	yes							yes	yes						yes	yes					yes
Cubilia cibili	kubili	Sapindaceae	woody	tree		regional crop - Java	SE Asia	yes							yes							yes
Cucurbita ficifolia	fig leaf gourd	Cucurbitaceae	vine	herbaceous	yes	minor global crop	Americas		yes			yes	green and ripe		yes	yes	yes					yes	yes					yes
Curcuma mangga	temu lalab	Zingiberaceae	herb	forb		regional crop - SE Asia	SE Asia		yes		yes				yes							yes							yes
Curcuma zedoaria	zeooary	Zingiberaceae	herb	forb		minor global crop	Asia		yes		yes				yes	yes	yes	yes				yes							yes
Cyathea angiensis	tree fern	Cyatheaceae	woody	tree fern		regional crop	New Guinea	yes							yes	yes						yes							yes
Cycas rumphii	cycas	Cycadaceae	woody	palmlike		regional crop - Indonesia	SE Asia		yes, only when tightly curled						yes		yes					yes						yes
Cynara cardunculus	cardoon	Asteraceae	herb	forb		minor global crop	Eurasia			petiole							yes	yes				yes	yes					yes
Cynara cornigera	phouskalla	Asteraceae	herb	forb		regional crop - Cyperus, Libya	Mediterranean				yes							yes					yes					yes
Cynara scolymus	globe artichoke	Asteraceae	herb	forb		global crop	Eurasia				yes							yes				yes	yes					yes
Cynophalla flexuosa	falseteeth	Capparaceae	woody	shrub		regional crop - Mesoamerica	Mesoamerica, N. America						yes		yes		yes					yes	yes					yes
Cyphomandra betacea	tree tomato	Solanaceae	woody	shrub		minor global crop	Andes						yes		yes	yes	yes					yes	yes					yes	yes
Cyphomandra hartwegii	Hartweg's tree tomato	Solanaceae	woody	shrub		regional crop	Americas						yes		yes	yes	yes					yes						yes	yes
Cyphostemma adenocaule	mwengele	Vitaceae	vine	herbaceous		regional crop	Ethiopia	yes					yes		yes	yes						yes	yes					yes
Cyrtosperma merkusii	swamp taro	Araceae	herb	forb		regional crop - Pacific	Pacific	yes			yes	yes			yes	yes						yes				yes			yes	yes
Dacryodes edulis	safou	Burseraceae	woody	tree		regional crop	Africa						yes		yes							yes	yes					yes	yes
Dacryodes kleineana	agagoro	Burseraceae	woody	tree		regional crop - Africa	Africa						yes		yes							yes
Dahlia imperialis	catarina	Asteraceae	herb	giant		regional crop	Central America	yes							yes							yes						yes
Dendrobium spp	dendrobium orchids	Orchidaceae	herb	epiphyte		minor global crop	Asia, Australia					yes			yes	yes						yes							yes
Dendrocalamus asper	giant bolo	Poaceae	woody	bamboo		minor global crop	SE Asia		yes						yes	yes	yes					yes	yes					yes	yes
Dendrocalamus brandisii	dendrocalamus bamboo	Poaceae	woody	bamboo		regional crop - Asia	Asia		yes						yes	yes	yes					yes						yes	yes
Dendrocalamus giganteus	giant timber bamboo	Poaceae	woody	bamboo		minor global crop	Asia		yes						yes	yes						yes						yes	yes
Dendrocalamus hamiltonii	mai wan	Poaceae	woody	bamboo		regional crop - Asia	Asia		yes						yes	yes	yes					yes						yes	yes
Dendrocalamus hookeri	kalo bans	Poaceae	woody	bamboo		regional crop - Asia	Asia		yes						yes	yes	yes					yes						yes	yes
Dendrocalamus latiflorus	sweet bamboo	Poaceae	woody	bamboo		minor global crop	Asia		yes						yes	yes	yes					yes						yes	yes
Dendrocalamus membranaceus	wa-ya	Poaceae	woody	bamboo		regional crop - China	Asia		yes						yes	yes	yes					yes						yes	yes
Dendrocalamus minor	dendrocalamus bamboo	Poaceae	woody	bamboo		regional crop - China	Asia		yes						yes		yes					yes						yes	yes
Dendrocalamus sinicus	giant dragon bamboo	Poaceae	woody	bamboo		regional crop - China	Asia		yes						yes	yes	yes					yes						yes	yes
Dendrocalamus validus	dendrocalamus bamboo	Poaceae	woody	bamboo		regional crop - China	Asia		yes						yes		yes					yes						yes	yes
Dicliptera chinensis	Chinese foldwing	Acanthaceae	herb	forb		regional crop - China	Asia	yes	yes						yes							yes						yes
Dicliptera laevigata	pinten	Acanthaceae	herb	forb		regional crop - Indonesia	SE Asia	yes							yes							yes						yes
Diclipteria papuana	em	Acanthaceae	herb	forb		regional crop - New Guinea	New Guinea	yes							yes	yes						yes						yes
Dioscorea mangenotiana	kimpundia	Dioscoreaceae	vine	herbaceous		regional crop - Congo	W. Africa		yes						yes							yes						yes	yes
Diplazium esculentum	vegetable fern	Athyriaceae	herb	fern		minor global crop	Asia	young	yes						yes	yes	yes					yes							yes	yes
Diplotaxis muralis	sylvetta	Brassicaceae	woody	shrub	yes	minor global crop	Mediterranean	yes										yes	yes			yes	yes					yes
Diplotaxis tenuifolia	sylvetta	Brassicaceae	woody	shrub	yes	minor global crop	Mediterranean	yes										yes	yes			yes	yes					yes
Dracaena angustifolia	dracaena	Dracaenaceae	woody	woody lily		minor global crop	Asia to Australia	yes					yes		yes		yes					yes						yes
Dracaena reflexa	song of India	Dracaenaceae	woody	woody lily		regional crop - Congo	Africa	yes							yes							yes						yes
Dystaenia takesimiana	Korean pig plant	Apiaceae	herb	forb		regional crop	S. Korea	yes	yes									yes	yes	yes		yes						yes	yes
Elaeis guineensis	African oil palm	Arecaceae	woody	palm		global crop	Africa						roasted fruit of some varieties		yes							yes						yes
Eleutherococcus trifoliatus	ngu gia bi gai	Araliaceae	woody	shrub		regional crop	Asia	yes	yes						yes	yes	yes	yes				yes							yes
Ensete glaucum	snow banana	Musaceae	herb	forb		regional crop - SE Asia	Asia, New Guinea	"leaf sheath"			yes				yes	yes	yes	yes				yes						yes	yes
Enydra fluctuans	buffalo spinach	Asteraceae	aquatic	herb		regional crop - SE ASia	Africa, Asia	yes							yes		yes								yes	yes		yes
Equisetum arvense	horsetail	Equisetaceae	herb	forb		regional crop - Japan	N. Temperate		yes									yes	yes	yes	yes	yes	yes			yes		yes	yes	yes
Eryngium aquaticum	marsh eryngo	Apiaceae	herb	forb		regional crop - USA	E. N. America	yes									yes	yes	yes			yes				yes		yes
Eryngium creticum	sfalágatho	Apiaceae	herb	forb		regional crop	Mediterranean, W. Asia	yes									yes	yes					yes					yes
Erythrina edulis	chachafruto	Fabaceae	woody	tree		regional crop - Andes	Andes							beans		yes						yes						yes
Erythrina mexicana	colorín	Fabaceae	woody	tree		regional crop - Mexico	Mesoamerica	yes							yes	yes						yes	yes					yes
Erythrococca atrovirens	ntenteke	Euphorbiaceae	woody	shrub		regional crop	Africa	yes							yes	yes						yes						yes	yes	yes
Euphorbia neriifolia		Euphorbiaceae	woody	cactuslike		regional crop	SE Asia	yes							yes							yes	yes	yes				yes
Euterpe oleracea	acaí	Arecaceae	woody	palm		minor global crop	S. America	yes	yes						yes							yes				yes			yes	yes
Fagopyrum acutatum	perennial buckwheat	Polygonaceae	herb	forb		regional crop - Eurasia	Eurasia	yes	yes									yes	yes			yes	yes					yes
Fernaldia pandurata	loroco	Apocynaceae	vine	liana		regional crop	C. America				yes				yes	yes						yes						yes
Ficus auriculata	va	Moraceae	woody	tree		regional crop	SE Asia						young fruit raw as veg		yes	yes	yes					yes						yes
Ficus copiosa	kumu musong	Moraceae	woody	tree		regional crop - New Guinea	New GUinea	yes							yes	yes						yes						yes
Ficus dammaropsis	tarwe	Moraceae	woody	tree		regional crop	New Guinea	yes					yes		yes	yes	yes					yes						yes
Ficus pseudopalma	palmleaf fig	Moraceae	woody	shrub		regional crop	Philippines		yes						yes							yes						yes
Ficus virens	pakar	Moraceae	woody	tree		regional crop - India	S. Asia		yes						yes	yes						yes						yes
Ficus wassa	wassa fig	Moraceae	woody	tree		regional crop - New Guinea	New Guinea	yes							yes							yes						yes
Filipendula vulgaris	dropwort	Rosaceae	herb	forb		regional crop	Eurasia	yes									yes	yes	yes			yes						yes	yes
Floscopa scandens	floscopa	Commelinaceae	herb	forb		regional crop - New Guinea	Asia, New GUinea, Australia	yes	yes						yes	yes	yes					yes						yes
Garcinia cowa	tai chua	Clusiaceae	woody	tree		regional crop	SE Asia	yes	yes						yes							yes						yes
Gigantochloa albociliata	gigantochloa bamboo	Poaceae	woody	bamboo		regional crop - Asia	Asia		yes						yes							yes						yes	yes
Gigantochloa atter	bambu ater	Poaceae	woody	bamboo		regional crop - Java	Asia		yes						yes							yes						yes	yes
Gigantochloa levis	bolo	Poaceae	woody	bamboo		regional crop - SE Asia	Asia		yes						yes							yes						yes	yes
Gigantochloa ligulata	buloh tikan	Poaceae	woody	bamboo		regional crop - Malaysia	Asia		yes						yes		yes					yes						yes
Gigantochloa robusta	buluh rian	Poaceae	woody	bamboo		regional crop - SE Asia	SE Asia		yes						yes							yes						yes	yes
Gigantochloa verticillata	bambu gombong	Poaceae	woody	bamboo		regional crop - Asia	Asia		yes						yes		yes					yes	yes					yes	yes
Girardinia diversifolia	nilgiri nettle	Urticaceae	herb	forb		regional crop - S. Asia	Africa, Asia	yes	yes						yes	yes						yes						yes	yes
Glehnia littoralis	dragon whiskers	Apiaceae	herb	forb		regional crop - coastal E. Asia	Asia		yes								yes	yes	yes			yes						yes
Glochidion rubrum	sódó	Phyllanthaceae	woody	tree		regional crop	SE Asia	yes	yes						yes							yes						yes	yes	yes
Gnetum africanum	eru	Gnetaceae	vine	liana		regional crop	Africa	yes							yes							yes							yes
Gnetum buchholzianum	eru	Gnetaceae	vine	liana		regional crop	Africa	yes							yes							yes							yes
Gnetum gnemon	jointfir	Gnetaceae	woody	tree		minor global crop	Asia	yes			yes		green		yes							yes						yes	yes	yes
Gongronema latifolium	nsurogya	Apocynaceae	vine	liana		regional crop - Nigeria	Africa	yes							yes							yes						yes	yes
Gundelia tournefortii	galgal	Asteraceae	herb	forb		regional crop - W. Asia	W. Asia	yes			yes, like artichoke; also flowering stem						yes	yes	yes				yes	yes				yes
Gustavia speciosa	chupo	Lecythidaceae	woody	tree		regional crop - S. America	S. America						fruit		yes							yes						yes
Gustavia superba	mebrillo	Lecythidaceae	woody	tree		regional crop - S. America	S. America						ripe fruit, oily, used in soups		yes							yes						yes
Gynura amplexicaulis	stem-clasping gynura	Asteraceae	herb	forb		regional crop - Nigeria	Africa	yes							yes							yes						yes
Gynura bicolor	Okinawa spinach	Asteraceae	herb	forb		regional crop - Asia	Asia	yes	yes						yes		yes					yes						yes	yes
Gynura procumbens	longevity spinach	Asteraceae	herb	forb		regional crop - Java	Africa, Asia	yes							yes		yes					yes						yes	yes
Gynura pseudochina	sambung nyawa batik	Asteraceae	herb	forb		minor global crop	Africa, Asia	yes							yes								yes					yes
Hablitzia tamnoides	Caucasian spinach	Amaranthaceae	vine	herbaceous		regional crop	Eurasia	yes	yes									yes	yes			yes	yes					yes	yes
Heinsia crinita	bush apple	Rubiaceae	woody	shrub		regional crop - Nigeria	Africa	yes							yes							yes						yes
Hemerocallis citrina	tall daylily	Xanthorrhoeaceae	herb	forb		minor global	Asia		yes		yes	yes				yes	yes	yes	yes	yes		yes						yes	yes
Hemerocallis fulva	day lily	Xanthorrhoeaceae	herb	forb		regional crop - China	Asia				yes					yes	yes	yes	yes	yes		yes						yes	yes
Hemerocallis lilioasphodelus	day lily	Xanthorrhoeaceae	herb	forb		regional crop - China	Asia				yes					yes	yes	yes	yes	yes		yes						yes	yes
Hemerocallis minor	grassleaf daylily	Xanthorrhoeaceae	herb	forb		regional crop - China	E. Asia				yes					yes	yes	yes	yes			yes						yes	yes
Hemerocallis thunbergii	Thunberg's daylily	Xanthorrhoeaceae	herb	forb		regional crop - China	E. Asia				yes					yes	yes	yes	yes	yes		yes						yes	yes
Heracleum sphondylium var. montanum	osuri	Apiaceae	herb	forb		experimental	E. Asia	yes	yes									yes	yes	yes		yes	yes
Hibiscus acetosella	cranberry leaf hibiscus	Malvaceae	woody	shrub		minor global crop		yes							yes							yes
Hibiscus radiatus	clavelina	Malvaceae	woody	shrub		minor global crop	Asia	yes							yes		yes					yes	yes					yes
Hosta longipes	rock hosta	Asparagaceae	herb	forb		regional	Eurasia		yes		flowerstalk							yes	yes	yes	yes	yes							yes	yes
Hosta sieboldiana	plantain lily	Asparagaceae	herb	forb		regional	Eurasia		yes		flowerstalk							yes	yes	yes	yes	yes							yes	yes
Hosta sieboldii	small-leaved hosta	Asparagaceae	herb	forb		regional	Eurasia		yes		flowerstalk							yes	yes	yes	yes	yes							yes	yes
Houttuynia cordata	fish-smelling herb	Saururaceae	herb	forb		regional crop - Asia	Asia		yes						yes	yes	yes	yes	yes			yes						yes	yes	yes
Hoya retuculata	sajor pepe	Apocynaceae	vine	liana		regional crop - Malaysia	Asia	yes	yes						yes							yes						yes	yes
Humulus lupulus	hops	Cannabaceae	vine	herbaceous		minor global crop	Eurasia, N. America		yes									yes	yes	yes		yes	yes					yes
Hydrocotyle sibthorpioides	lawn pennywort	Araliaceae	herb	forb		regional crop	Asia	yes							yes	yes						yes						yes	yes
Hygrophila auriculata	gokanta	Acanthaceae	aquatic	herb		regional crop - W. Africa	Africa	yes							yes										yes	yes		yes
Ipomoea alba	moonflower	Convolvulaceae	vine	herbaceous		minor global crop	Americas	yes				yes			yes		yes	yes				yes						yes	yes
Ipomoea aquatica	water spinach	Convolvulaceae	aquatic	herb		minor global crop	Asia	yes	yes						yes		yes					yes			yes	yes		yes
Ipomoea batatas	sweet potato	Convolvulaceae	herb	forb		global crop	S. America	yes							yes	yes	yes					yes	yes					yes	yes
Ipomoea littoralis	lagon	Convolvulaceae	vine	herbaceous		regional crop - Pacific Islands	Pacifici Islands	yes							yes							yes	yes					yes
Ipomoea muricata	clove bean	Convolvulaceae	vine	herbaceous		regional crop - India	Asia						fleshy fruitstalk		yes	yes						yes						yes	yes
Ipomoea pileata	mao bao shu teng	Convolvulaceae	vine	herbaceous		regional crop - Africa	Africa		yes						yes							yes						yes	yes	yes
Ipomoea violacea	beach moonflower	Convolvulaceae	vine	herbaceous		regional crop	tropical Americas	yes			calyx				yes							yes	yes					yes	yes
Iresine herbstii	beefsteak plant	Amaranthaceae	herb	forb		regional crop - New Guinea	Brazil	yes							yes							yes						yes	yes
Ixeridium dentatum	ssumbagwi	Asteraceae	herb	forb		regional crop - Korea	E. Asia	yes										yes	yes			yes						yes
Jaltomata procumbens	cozcatomatl	Solanaceae	herb	forb		regional crop	Americas	yes					yes		yes	yes						yes	yes					yes
Justicia insularis	tettu	Acanthaceae	herb	forb		regional crop - Africa	Africa	yes	yes						yes							yes	yes					yes
Kaempferia galanga	chandramula	Zingiberaceae	herb	forb		regional crop - Asia	India	yes							yes	yes	yes	yes				yes							yes	yes
Kalimeris indica	ma lan	Asteraceae	herb	forb		regional crop - China	Asia	yes	yes								yes	yes	yes			yes						yes	yes
Kedrostis leloja	leloja	Cucurbitaceae	vine	herbaceous		regional crop - Africa	Africa						yes		yes	yes						yes	yes					yes	yes
Kedrostis pseudogijef	yierit-etha	Cucurbitaceae	vine	liana		regional crop	African highlands	yes	yes						yes	yes							yes					yes
Lablab purpureus	lablab bean	Fabaceae	vine	herbaceous	yes	minor global crop	Africa, Asia??	yes			yes	yes	yes	green seeds	yes	yes	yes					yes	yes					yes	yes
Lasia spinosa	geli-geli	Araceae	aquatic	herb		minor global crop	Asia	yes		petiole					yes		yes					yes				yes		yes
Launaea cornuta	bitter lettuce	Asteraceae	herb	forb		new crop	E. Africa	yes							yes	yes							yes					yes
Launaea taraxacifolia	African lettuce	Asteraceae	herb	forb		regional crop	African highlands	yes							yes	yes						yes						yes
Lemna gibba	duckweed	Araceae	aquatic	herb	yes	minor global	global	yes							yes	yes	yes	yes	yes	yes		yes			yes			yes
Lemna minor	duckweed	Araceae	aquatic	herb	yes	minor global	global	yes							yes	yes	yes	yes	yes	yes		yes			yes			yes
Leptadenia lancifolia	leptadenia	Apocynaceae	vine	herbaceous		regional crop	Africa		yes			yes			yes	yes	yes						yes					yes
Leucaena collinsii	guaje del monte	Fabaceae	woody	tree		regional crop	Mesoamerica						yes		yes								yes					yes
Leucaena confertiflora	guaje zacatzin	Fabaceae	woody	tree		regional crop	Mesoamerica						yes			yes							yes					yes
Leucaena esculenta	guaje	Fabaceae	woody	tree		regional crop	Mesoamerica	yes			yes		yes	green seeds	yes		yes					yes	yes					yes
Leucaena lanceolata	guaje	Fabaceae	woody	tree		regional crop	Mesoamerica						yes		yes							yes	yes					yes
Leucaena pulverulenta	guaje	Fabaceae	woody	tree		regional crop	Mesoamerica, N. America	yes						green seeds	yes	yes	yes					yes	yes					yes
Levisticum officinale	lovage	Apiaceae	herb	forb		minor global crop	Europe	yes	yes									yes	yes	yes		yes	yes					yes	yes
Ligularia fischeri	gomchui	Asteraceae	herb	forb		new crop - S. Korea	E. Asia	yes										yes	yes			yes							yes	yes
Ligusticum porteri	osha	Apiaceae	herb	forb		regional crop - N. America	W. N. America	yes	yes									yes	yes	yes			yes					yes	yes	yes
Limbarda crithmoides	golden samphire	Asteraceae	herb	forb		experimental	Mediterranean	yes									yes	yes				yes	yes					yes
Limnocharis flava	water lettuce	Butomaceae	aquatic	herb		regional crop - SE Asia	tropical Americas	young				yes			yes										yes			yes
Limnophila rugosa	swamp leaf	Plantaginaceae	aquatic	emergent		minor global crop	Asia, Pacific	yes	yes						yes										yes				yes
Ludwigia repens	pang-pui	Onagraceae	aquatic	herb		regional crop	tropics		yes						yes										yes	yes		yes
Lycium barbarum	goji	Solanaceae	woody	shrub		minor global crop	E. Asia						yes				yes	yes	yes			yes	yes					yes
Lycium chinense	edible leaf goji	Solanaceae	woody	shrub		regional crop	Asia	yes	yes				yes			yes	yes	yes	yes			yes	yes					yes	yes
Lycium pallidum	pale wolfberry	Solanaceae	woody	shrub		historic crop	SW N. America						yes					yes	yes				yes	yes				yes
Madhuca longifolia	butter tree	Sapotaceae	woody	tree		regional crop - India	Asia						green or ripe, cooked				yes						yes					yes
Maesa latifolia	kipeit	Primulaceae	woody	shrub		regional crop	SE Asia	yes - toxic	yes						yes							yes						yes
Malva alcea	alcea	Malvaceae	herb	forb	yes	historic crop	Europe	yes										yes	yes			yes						yes	yes
Malva moschata	musk mallow	Malvaceae	herb	forb	yes	minor global crop	Eurasia	yes										yes	yes			yes						yes	yes
Malva sylvestris var. mauritania	zeni-aoi	Malvaceae	herb	forb	yes	historic crop	Europe	yes										yes	yes	yes		yes						yes
Malvaviscus arboreus	turk's cap	Malvaceae	woody	shrub		regional crop	Americas					yes			yes		yes					yes	yes					yes	yes
Manihot esculenta	cassava	Euphorbiaceae	woody	shrub	yes	global crop	S. America	yes							yes	yes	yes					yes	yes					yes	yes
Marsdenia australis	Austral doubah	Apocynaceae	vine	herbaceous		regional crop - Australia	Australia	yes				yes	young		yes		yes						yes	yes				yes	yes
Marsilea quadrifolia	water clover	Marsiliaceae	herbs	fern		regional crop	Eurasia	young	yes						yes		yes	yes							yes	yes		yes	yes
Matteuccia struthiopteris	ostrich fern	Onocleaceae	herb	fern		minor global crop	N. Temperate		yes										yes	yes	yes	yes				yes			yes	yes
Mauritia flexuosa	aguaje	Arecaceae	woody	palm		regional crop	S. America						fruit			yes	yes					yes						yes
Mayodendron igneum	kasalong kham	Bignoniaceae	woody	tree		regional crop - SE Asia	Asia					yes			yes							yes						yes
Medicago falcata	yellow medick	Fabaceae	herb	forb		minor global crop			yes							yes		yes	yes	yes		yes	yes					yes
Medicago sativa	alfalfa	Fabaceae	herb	forb		global crop	Eurasia		yes							yes		yes	yes	yes		yes	yes					yes
Melientha suavis	phakwanupa	Opiliaceae	woody	tree		regional crop	SE Asia	yes	yes			yes	yes		yes							yes						yes
Melocanna baccifera	tarai	Poaceae	woody	bamboo		regional crop - Asia			yes						yes							yes						yes	yes
Melothria scabra	mouse melon	Cucurbitaceae	vine	herbaceous		minor global crop	Mesoamerica						green		yes	yes	yes	yes				yes						yes
Mesembryanthemum aitonis	marygold	Aizoaceae	herb	succulent	yes	regional crop	tropical Africa	yes							yes	yes	yes					yes	yes					yes
Mesembryanthemum crystallinum	ice-plant	Aizoaceae	herb	succulent	yes	minor global crop	S. Africa	yes							yes	yes	yes					yes	yes					yes
Mesymbranthemum cordifolium	baby sunrose	Aizoaceae	herb	succulent	yes	regional crop	S. Africa	yes							yes	yes	yes					yes	yes					yes
Miliciea excelsa	African teak	Moraceae	woody	tree		regional crop	tropical Africa	yes							yes							yes	yes					yes
Momordica cochinchinensis	mu bie zi	Cucurbitaceae	vine	herbaceous		regional crop	Asia	yes	yes				green		yes							yes						yes
Momordica cymbalaria	kadavanchi	Cucurbitaceae	vine	herbaceous		regional crop	Africa, asia						green		yes		yes						yes					yes
Momordica dioica	kalsa	Cucurbitaceae	vine	herbaceous		minor global crop	Asia	yes	yes				green		yes		yes					yes	yes	yes				yes
Monochoria korsakowii	mulokjjam	Pontederiaceae	aquatic	herb		regional crop - Korea	Asia	yes										yes	yes						yes			yes
Monochoria vaginalis	chrach	Pontederiaceae	aquatic	herb		regional crop - SE Asia	SE Asia	yes							yes		yes								yes			yes
Moringa oleifera	moringa	Moringaceae	woody	tree		minor global crop	India	yes			yes	yes	yes	green seeds	yes		yes					yes	yes					yes
Moringa stenopetala	African moringa	Moringaceae	woody	tree		regional crop - Africa	Africa	yes			yes	yes	yes	green seeds	yes	yes	yes					yes	yes					yes
Morus alba	white mulberry	Moraceae	woody	tree		minor global crop	Asia	yes							yes	yes	yes	yes	yes			yes	yes					yes
Musa acuminata	banana	Musaceae	herb	forb		minor global crop	Asia				yes		yes		yes	yes						yes						yes
Musa balbisiana	plantain	Musaceae	herb	forb		minor global crop	Asia				yes		yes		yes							yes						yes
Musa paridisiaca	banana, plantain	Musaceae	herb	forb		global crop	hybrid				yes		yes		yes	yes	yes					yes						yes
Mussaenda frondosa	bedina	Rubiaceae	woody	shrub		regional crop - India	S & SE Asia	yes				sepal			yes		yes					yes						yes
Myriophyllum aquaticum	parrotsfeather	Haloragaceae	aquatic	herb		regional crop	global		yes						yes	yes	yes	yes							yes			yes
Myrrhis odorata	sweet cicely	Apiaceae	herb	forb		minor global	Eurasia	yes	yes	yes				green seeds				yes	yes	yes		yes						yes	yes
Nasturtium officinale	watercress	Brassicaceae	aquatic	herb	yes	minor global crop	Eurasia	yes	yes							yes		yes	yes	yes	yes				yes	yes		yes
Nastus elatus	nastus bamboo	Poaceae	woody	bamboo		minor global crop	Asia		yes						yes							yes						yes	yes
Neololeba atra	neololeba bamboo	Poaceae	woody	bamboo		regional crop - India	Asia, New Guinea, Australia		yes							yes						yes						yes	yes
Neptunia oleracea	water mimosa	Fabaceae	aquatic	herb	yes	minor global crop	Asia	yes	yes						yes										yes	yes		yes
Nesphostylis bracteata	Indian nesphostylis	Fabaceae	vine	liana		regional crop - India	S. Asia	yes					young pods		yes							yes	yes
Nuphar japonica	ko-hone	Nymphaeaceae	aquatic	emergent floater		regional crop - Japan	E. Asia	yes	yes						yes	yes	yes	yes	yes						yes			yes	yes
Nymphaea lotus	Egyptian lotus	Nymphaeaceae	herb	aquatic		regional crop	Africa					flowerstalk	green fruit		yes		yes								yes			yes
Nymphaea nouchali	blue water lily	Nymphaeaceae	herb	aquatic		regional crop	INdia to Australia	yes		yes					yes		yes								yes			yes
Nymphaea nouchali var. caerulea	blue water lily	Nymphaeaceae	aquatic	herb		regional crop	S. Africa					yes			yes		yes								yes			yes
Nymphaea pubescens	sung trang	Nymphaeaceae	aquatic	emergent floater		regional crop	SE Asia, New Guinea			flowerstalk					yes										yes			yes
Nymphoides hydrophylla	anemone	Menyanthaceae	aquatic	emergent floating		regional crop	Asia	yes	yes						yes		yes	yes							yes			yes	yes
Nymphoides peltata	water poppy	Menyanthaceae	aquatic	herb		regional crop - China	Asia		yes						yes	yes	yes	yes	yes						yes			yes
Oenanthe javanica	water celery	Apiaceae	aquatic	herb		regional crop - Asia	E. Asia	yes	yes						yes	yes	yes	yes	yes			yes			yes	yes		yes	yes
Oenocarpus bataua	patauá	Arecaceae	woody	palm		regional crop - S. America	S. America						yes - savory, rich in oil and protein		yes							yes						yes
Olea europaea	olive	Oleaceae	woody	tree		global crop	Africa through Asia						yes		yes	yes	yes	yes				yes	yes					yes
Oncidium spp.	dancing lady orchids	Orchidaceae	herb	epiphyte		minor global crop	America					yes			yes	yes						yes							yes
Opuntia atropes	nopal	Cactaceae	woody	cactus		regional crop	Mesoamerica	yes		cladodes					yes	yes	yes						yes	yes				yes
Opuntia ficus-indica	nopale cactus	Cactaceae	woody	cactus		minor global crop	Mesoamerica	yes		cladodes					yes	yes	yes	yes				yes	yes	yes				yes
Opuntia joconostle	xocnostle	Cactaceae	woody	cactus		regional crop	N. America			cladodes			yes - boiled				yes	yes					yes	yes				yes
Opuntia streptacantha	nopal	Cactaceae	woody	cactus		minor global crop	Mesoamerica	yes		cladodes					yes	yes	yes						yes	yes				yes
Ormocarpum cochinense	kalava	Fabaceae	woody	shrub		regional crop - New Guinea	New GUinea	yes	yes						yes							yes						yes
Oroxylum indicum	Indian trumpet-flower	Bignoniaceae	woody	tree		regional crop - Java	SE Asia	yes				yes	young		yes		yes					yes						yes
Osmunda cinnamomea	cinnamon fern	Osmundaceae	herb	fern		regional crop	N. America, S. America, Asia		yes						yes	yes	yes	yes	yes
Osmunda japonica	Japanese royal fern	Osmundaceae	herb	fern		regional crop	Asia		yes									yes	yes			yes				yes			yes	yes
Oxalis corniculata	ambuti	Oxalidaceae	herb	forb		regional crop - Himalayas	Old World	yes								yes						yes							yes	yes
Oxyria digyna	mountain sorrel	Polygonaceae	herb	forb		minor global crop	N. temperate	yes										yes	yes	yes	yes	yes						yes	yes
Oxytenanthera abyssinica	chommel	Poaceae	woody	bamboo		regional crop - Africa	Africa		yes						yes	yes	yes					yes	yes					yes	yes
Pandanus conoideus	marita	Pandanaceae	woody	palmlike		regional crop - New Guinea	New Guinea						fruit, oily		yes	yes						yes						yes
Parkia nitida	black manariballi	Fabaceae	woody	tree		regional crop	tropical Americas							green seeds	yes							yes						yes
Parkia speciosa	petai	Fabaceae	woody	tree		regional crop	SE Asia	yes	yes		yes		yes	green seeds	yes							yes						yes
Passiflora biflora	twoflowered passionflower	Passifloraceae	vine	liana		minor global crop	tropical Americas	yes	yes			yes			yes							yes
Pennisetum purpureum	napier grass	Poaceae	herb	grass		minor global crop			yes						yes	yes	yes	yes				yes	yes
Pentaphragma begoniifolia	salang suang	Pentaphragmataceae	herb	forb		regional crop - Malacca	SE Asia	yes							yes							yes						yes
Pereskia aculeata	barbados shrub	Cactaceae	vine	liana		regional crop	Central and South America	yes							yes	yes							yes					yes	yes
Peristrophe roxburghiana	red silk-thread	Acanthaceae	herb	forb		regional crop - China	Asia	yes	yes		yes	yes			yes	yes	yes									yes		yes
Persea americana	avocado	Lauraceae	woody	tree		global crop	Mesoamerica						yes		yes	yes	yes					yes						yes
Persea schiedeana	chinene	Lauraceae	woody	tree		regional crop	Mesoamerica						yes		yes	yes	yes					yes						yes
Persicaria barbata	bearded knotweed	Polygonaceae	herb	forb		minor global crop	Asia, Africa	yes							yes							yes						yes
Persicaria pulchra	beautiful knotweed	Polygonaceae	herb	forb		minor global crop	Asia, Africa	yes							yes							yes						yes
Petasites japonicus	fuki	Asteraceae	herb	forb		regional crop - E. Asia	E. asia			petiole	yes					yes		yes	yes			yes				yes			yes	yes
Peucedanum japonicum		Apiaceae	herb	forb		regional crop - Asia	Asia	yes							yes		yes	yes				yes	yes					yes
Phalaenopsis spp.	moth orchids	Orchidaceae	herb	epiphyte		minor global crop	Asia, Australia					yes			yes	yes						yes							yes
Phaseolus coccineus	runner bean	Fabaceae	vine	herbaceous	yes	minor global crop	Mesoamerica	yes				yes	yes	green seeds		yes	yes	yes				yes						yes
Phaseolus lunatus	lima bean	Fabaceae	vine	herbaceous	yes	minor global crop	Americas						yes	green seeds	yes		yes					yes	yes					yes
Phaseolus polystachios	thicket bean	Fabaceae	vine	herbaceous	yes	historic crop	N. America						yes	green seeds			yes	yes	yes			yes						yes	yes
Phaseolus ritensis	perennial tepary bean	Fabaceae	vine	herbaceous	yes	regional	SW N. America, Mesoamerica						yes	green seeds		yes							yes	yes				yes
Philoglossa peruviana	tsbajushá	Asteraceae	herb	forb		regional crop - Andes	Andes	yes								yes						yes						yes
Phragmites australis	common reed	Poaceae	herb	grass		regional crop - China	global		yes						yes	yes	yes	yes	yes	yes						yes		yes
Phyllostachys angusta	phyllostachys bamboo	Poaceae	woody	bamboo		minor global crop	Asia		yes							yes	yes	yes	yes			yes						yes	yes
Phyllostachys aureosulcata	phyllostachys bamboo	Poaceae	woody	bamboo		minor global crop	Asia		yes							yes	yes	yes	yes			yes						yes	yes
Phyllostachys bambusoides	giant timber bamboo	Poaceae	woody	bamboo		minor global crop	E. Asia		yes							yes	yes	yes				yes						yes	yes
Phyllostachys dulcis	sheetshoot	Poaceae	woody	bamboo		minor global crop	E. Asia		yes							yes	yes	yes				yes						yes	yes
Phyllostachys edulis	moso	Poaceae	woody	bamboo		minor global crop	E. Asia		yes							yes	yes	yes				yes						yes	yes
Phyllostachys fimbriligula	phyllostachys bamboo	Poaceae	woody	bamboo		regional crop - Asia	E. Asia		yes							yes	yes	yes	yes			yes						yes	yes
Phyllostachys flexuosa	phyllostachys bamboo	Poaceae	woody	bamboo		minor global crop	Asia		yes							yes	yes	yes	yes			yes						yes	yes
Phyllostachys incarnata	phyllostachys bamboo	Poaceae	woody	bamboo		regional crop - China	E. Asia		yes							yes	yes	yes	yes			yes						yes	yes
Phyllostachys makinoi	makino	Poaceae	woody	bamboo		regional crop - Asia	E. Asia		yes							yes	yes	yes				yes						yes	yes
Phyllostachys meyeri	Meyer bamboo	Poaceae	woody	bamboo		minor global crop	E. Asia		yes							yes	yes	yes				yes						yes	yes
Phyllostachys nidularia	big node bamboo	Poaceae	woody	bamboo		regional crop - China	E. Asia		yes							yes	yes	yes	yes			yes						yes	yes
Phyllostachys nigra	black bamboo	Poaceae	woody	bamboo		regional crop - Asia	E. Asia		yes							yes	yes	yes				yes						yes	yes
Phyllostachys nuda	phyllostachys bamboo	Poaceae	woody	bamboo		minor global crop	E. Asia		yes							yes	yes	yes	yes			yes						yes	yes
Phyllostachys parvifolia	phyllostachys bamboo	Poaceae	woody	bamboo		regional crop - China	E. Asia		yes							yes	yes	yes				yes						yes	yes
Phyllostachys prominens	phyllostachys bamboo	Poaceae	woody	bamboo		regional crop - China	E. Asia		yes							yes	yes	yes	yes			yes						yes	yes
Phyllostachys propinqua	phyllostachys bamboo	Poaceae	woody	bamboo		regional crop - China	E. Asia		yes							yes	yes	yes				yes						yes	yes
Phyllostachys rubromarginata	koon yam chuk	Poaceae	woody	bamboo		regional crop - China	E. Asia		yes							yes	yes	yes				yes						yes	yes
Phyllostachys sulphurea	green bamboo	Poaceae	woody	bamboo		minor global crop	E. Asia		yes							yes	yes	yes				yes						yes	yes
Phyllostachys violascens	phyllostachys bamboo	Poaceae	woody	bamboo		regional crop - China	E. Asia		yes							yes	yes	yes				yes						yes	yes
Phyllostachys viridiglaucescens	phyllostachys bamboo	Poaceae	woody	bamboo		minor global crop	Asia		yes							yes	yes	yes				yes						yes	yes
Phyllostachys vivax	phyllostachys bamboo	Poaceae	woody	bamboo		minor global crop	Asia		yes							yes	yes	yes				yes						yes	yes
Physalis coztomatl	coztomatl	Solanaceae	herb	forb	yes	regional crop	Mexico						yes		yes	yes	yes					yes	yes					yes
Physalis longifolia	ground cherry	Solanaceae	herb	forb		regional crop - SW N. America	N. America						yes				yes	yes	yes			yes	yes					yes
Physalis peruviana	goldenberry	Solanaceae	herb	forb	yes	minor global crop	S. America						yes		yes	yes	yes					yes						yes
Phytolacca acinosa	Indian pokeweed	Phytolaccaceae	herb	forb		regional crop	Eurasia	yes	yes						yes		yes					yes						yes
Phytolacca americana	pokeweed	Phytolaccaceae	herb	forb		minor global crop	N. America	yes	yes								yes	yes	yes			yes						yes	yes
Phytolacca dodecandra	endod	Phytolaccaceae	herb	forb		regional crop	tropical Africa	yes							yes							yes						yes
Phytolacca esculenta	yama-gobo	Phytolaccaceae	herb	forb		regional crop	E. Asia	yes	yes						yes	yes	yes	yes	yes			yes						yes
Phytolacca octandra	inkweed	Phytolaccaceae	herb	forb		regional crop	tropical Americas	yes	yes						yes	yes						yes						yes
Pilea melastomoides	popongan	Urticaceae	herb	forb		regional crop	Java	yes	yes						yes	yes						yes							yes	yes
Pimpinella calycina	chamnamul	Apiaceae	herb	forb		regional crop - Korea	E. Asia	yes										yes	yes			yes
Piper auritum	root beer leaf	Piperaceae	woody	shrub		regional crop	tropical Americas	yes		yes					yes	yes	yes	yes				yes						yes	yes	yes
Piper betle	betel leaf	Piperaceae	vine	liana		regional crop - China	Asia		yes						yes							yes							yes	yes
Piper sarmentosum	pepper leaf	Piperaceae	herb	forb		regional crop	Asia	yes							yes		yes					yes							yes	yes
Pisonia umbellifera	lettuce tree	Nyctaginaceae	woody	tree		regional crop	Asia	yes							yes							yes						yes
Plantago asiatica	kiljjanggu	Plantaginaceae	herb	forb	yes	regional crop - E. Asia	E. Asia	yes									yes	yes	yes			yes						yes	yes
Plantago coronopus	buckshorn plantain	Plantaginaceae	herb	forb	yes	regional crop - Europe	Europe	yes									yes	yes	yes			yes	yes					yes
Plantago major	greater plantain	Plantaginaceae	herb	forb	yes	minor global crop	Eurasia	yes							yes	yes	yes	yes	yes	yes		yes	yes					yes
Platycodon grandiflorum	balloonflower	Campanulaceae	herb	forb	yes	regional crop		yes										yes	yes	yes		yes
Pleioblastus simonii	metake	Poaceae	woody	bamboo		regional crop - Asia	E. Asia		yes								yes	yes				yes						yes	yes
Pluchea indica	Indian pluchea	Asteraceae	woody	shrub		regional crop - SE Asia	Asia	yes	yes			flower heads			yes							yes						yes
Plukenetia corniculata	chumbai	Euphorbiaceae	vine	liana		regional crop	S & SE Asia	yes							yes							yes						yes	yes
Plukenetia volubilis	sacha inchi	Euphorbiaceae	vine	liana		minor global crop	S. America	yes							yes							yes						yes	yes
Polyscias cumingiana	daun grisik	Araliaceae	woody	shrub		minor global crop	SE Asia, Pacific	yes							yes							yes						yes
Polyscias fruticosa	ming aralia	Araliaceae	woody	shrub		minor global crop	SE Asia, Pacific	yes	yes						yes							yes							yes
Pouzolzia zeylanica	rubai	Urticaceae	herb	forb		regional crop	Asia	yes							yes	yes	yes					yes	yes					yes
Premna serratifolia	la cach	Lamiaceae	woody	tree		regional crop	SE Asia	yes							yes							yes				yes		yes
Prosopis cineraria	khejri	Fabaceae	woody	tree		regional crop - India	Africa, W. Asia, S. Asia						yes young green		yes		yes						yes	yes				yes
Pseudosasa hindsii	kanzan-chiku	Poaceae	woody	bamboo		regional crop - Asia	E. Asia		yes							yes	yes	yes				yes						yes	yes
Psophocarpus scandens	African winged bean	Fabaceae	vine	herbaceous	yes	regional crop - Africa	Africa	yes					yes		yes							yes				yes		yes
Psophocarpus tetragonobolus	winged bean	Fabaceae	vine	herbaceous	yes	minor global crop	New Guinea	yes	yes		yes	yes	yes	green seeds	yes	yes						yes						yes
Pteridium aquilinum var. latiusculum	bracken	Dennstaedtiaceae	herb	fern		regional crop	E. Asia	young	yes							yes	yes	yes	yes	yes		yes						yes	yes
Pterocarpus mildbraedii	padouk blanc	Fabaceae	woody	tree		new crop	Africa	yes							yes							yes						yes
Pterocarpus santalinoides	gyamantoa	Fabaceae	woody	tree		regional crop	Africa, tropical Americas	yes							yes							yes						yes
Pterocarpus soyauxii	bois rouge	Fabaceae	woody	tree		regional crop	Africa	yes								yes						yes						yes
Pulicaria odora	false fleabane	Asteraceae	herb	forb		regional crop - Yemen	Mediterranean, W. Asia	yes							yes		yes	yes					yes					yes	yes
Reichardia picroides	French scorzonera	Asteraceae	herb	forb		historic crop	Mediterranean	yes										yes				yes						yes	yes
Rheum altaicum	reven altakskii	Polygonaceae	herb	forb		regional crop	Siberia			petiole								yes	yes	yes	yes	yes	yes					yes
Rheum emodi	Himalayan rhubarb	Polygonaceae	herb	forb		minor global crop	Himalayas			petiole						yes		yes	yes	yes		yes						yes
Rheum officinale	medicinal rhubarb	Polygonaceae	herb	forb		regional crop	C. Eurasia			petiole						yes		yes				yes						yes
Rheum palmatum	Turkey rhubarb	Polygonaceae	herb	forb		minor global crop	Eurasia			petiole								yes	yes			yes	yes					yes
Rheum x cultorum	rhubarb	Polygonaceae	herb	forb		minor global crop	Eurasia			petiole						yes		yes	yes	yes	yes	yes						yes
Rumex abyssinicus	makomako	Polygonaceae	herb	forb	yes	regional crop - Ethiopia	Africa	yes								yes	yes					yes	yes					yes	yes
Rumex acetosa	garden sorrel	Polygonaceae	herb	forb	yes	minor global crop	Europe	yes								yes		yes	yes	yes		yes	yes					yes	yes
Rumex acetosella	sheep sorrel	Polygonaceae	herb	forb	yes	minor global crop	Eurasia	yes										yes	yes	yes		yes	yes					yes	yes
Rumex alpinus	alpine dock	Polygonaceae	herb	forb	yes	historic crop	C. Eurasia	yes										yes	yes	yes	yes	yes						yes	yes
Rumex brownii	dock	Polygonaceae	herb	forb	yes	regional crop	New Caledonia	yes							yes		yes					yes	yes					yes	yes
Rumex dentatus	dock	Polygonaceae	herb	forb	yes	regional crop	Africa to Siberia	yes										yes	yes	yes	yes	yes	yes					yes	yes
Rumex nepalensis	dock	Polygonaceae	herb	forb	yes	regional crop	Asia	yes							yes	yes	yes	yes				yes						yes	yes
Rumex obtusifolius	dock	Polygonaceae	herb	forb	yes	regional crop	Eurasia	yes										yes	yes	yes		yes	yes					yes	yes
Rumex patientia	patience dock	Polygonaceae	herb	forb	yes	historic crop	Eurasia	yes										yes	yes			yes						yes	yes
Rumex rugosus	garden sorrel	Polygonaceae	herb	forb	yes	minor global crop	Eurasia	yes										yes	yes	yes		yes						yes	yes
Rumex sagittatus	soorengan	Polygonaceae	herb	forb	yes	regional crop	Java	yes							yes							yes						yes	yes
Rumex scutatus	buckler-leaf sorrel	Polygonaceae	herb	forb	yes	regional crop	Europe	yes								yes		yes	yes	yes		yes	yes					yes	yes
Rungia klossii	rungia	Acanthaceae	herb	forb		regional crop - New Guinea	New Guinea	yes							yes	yes	yes					yes						yes
Saccharum maximum	giant cane	Poaceae	herb	grass		regional crop - Pacific	Pacific				yes				yes							yes						yes
Saccharum spontaneum var. edulis	lowlands pitpit	Poaceae	herb	grass		regional crop - New Guinea	New Guinea				yes				yes	yes	yes					yes						yes
Sagittaria latifolia	arrowhead	Alismataceae	aquatic	herb	yes	regional crop - N. America	N. America		yes		flower stalk						yes	yes	yes	yes	yes				yes			yes
Sagittaria sagittifolia	zi gu	Alismataceae	aquatic	herb	yes	minor global crop	Asia to Australia	yes	yes						yes		yes								yes			yes
Sagittaria trifolia	kuwai	Alismataceae	aquatic	emergent	yes	regional crop	Asia	yes	yes						yes		yes	yes	yes						yes			yes
Salvadora persica	salvadora	Salvadoraceae	woody	tree		new crop - India	Africa, Asia	yes					yes		yes	yes	yes						yes	yes				yes
Sambucus canadensis	American elderberry	Adoxaceae	woody	shrub		minor global crop	Americas					yes			yes	yes	yes	yes	yes			yes	yes					yes	yes
Sambucus nigra	European elderberry	Adoxaceae	woody	shrub		minor global crop	Europe					yes				yes		yes	yes			yes	yes					yes	yes
Sanguisorba minor	salad burnet	Rosaceae	herb	forb		minor global crop	Eurasia	yes							yes	yes	yes	yes	yes			yes						yes
Sanguisorba officinalis	garden burnet	Rosaceae	herb	forb		minor global crop	Eurasia	yes										yes	yes			yes						yes
Sarcocornia fruitocsa	perennial glasswort	Amaranthaceae	woody	shrub		experimental	Chile	yes	yes									yes				yes	yes					yes
Sarcocornia neei	perennial glasswort	Amaranthaceae	woody	shrub		new crop	Eurasia, N. Africa	yes	yes									yes				yes	yes					yes
Sarcocornia neei	katuk	Phyllanthaceae	woody	shrub		minor global crop	Asia	yes	yes				yes		yes		yes					yes						yes	yes	yes
Sasa kurilensis	chishima-zasa	Poaceae	woody	bamboo		regional crop - Asia	E. Asia		yes							yes	yes	yes				yes						yes	yes
Saxifraga stolonifera	strawberry saxifrage	Saxifragaceae	herb	forb		regional crop	Asia	yes								yes	yes	yes				yes						yes	yes	yes
Schismatoglottis calyptrata	nyampon	Araceae	herb	forb		regional crop - SE Asia, New Guinea	SE ASia, New Guinea	yes		stolon	yes	yes			yes		yes					yes							yes	yes
Schizostachyum brachycladum	buloh nipis	Poaceae	woody	bamboo		regional crop - SE Asia	Asia		yes						yes		yes					yes						yes	yes
Schizostachyum lima	sumbilig	Poaceae	woody	bamboo		regional crop - New Guinea	Asia, New Guinea		yes						yes		yes					yes						yes	yes
Scolymus hispanicus	golden thistle	Asteraceae	herb	forb		regional crop	Mediterranean	yes	yes								yes	yes				yes	yes					yes
Scorzonera hispanica	scorzonera	Asteraceae	herb	forb		minor global crop	Eurasia	yes	yes		yes					yes	yes	yes	yes			yes	yes					yes
Sechium edule	chayote	Cucurbitaceae	vine	herbaceous		minor global crop	Mesoamerica	yes	yes			yes	yes		yes	yes	yes					yes						yes
Sechium tacaco	tacaco	Cucurbitaceae	vine	herbaceous		regional crop	Costa Rica						yes		yes							yes						yes
Sedum roseum	rhodiola	Crassulaceae	herb	forb		new crop - circumboreal	circumboreal	yes											yes	yes	yes	yes	yes					yes
Sedum rupestre	Jenny stonecrop	Crassulaceae	herb	succulent		regional crop	Europe	yes	yes									yes	yes			yes						yes
Sedum sarmentosum	tollamul	Crassulaceae	herb	succulent		experimental	E. Asia	yes										yes	yes	yes		yes	yes	yes				yes	yes
Sedum telephium	orpine	Crassulaceae	herb	succulent		regional crop	Europe	yes	yes								yes	yes	yes	yes		yes	yes					yes
Semiarundinaria fastuosa	semiarundinaria bamboo	Poaceae	woody	bamboo		minor global crop	Asia		yes								yes	yes				yes						yes	yes
Senna obtusifolia	sicklepod	Fabaceae	woody	shrub		regional crop - Africa	Americas	yes							yes	yes	yes					yes						yes
Senna siamea	kassod tree	Fabaceae	woody	tree		regional crop	SE Asia		yes		yes		yes		yes							yes						yes
Senna sophera	positive bright	Fabaceae	woody	shrub		regional crop - China	Asia		yes				young		yes							yes						yes
Sesbania grandiflora	vegetable hummingbird	Fabaceae	woody	tree		minor global crop	Asia, Australia	yes				yes	yes		yes							yes						yes
Sesuvium portulacastrum	seaside purslane	Aizoaceae	herb	succulent		regional crop	circumtropical	yes							yes		yes					yes	yes					yes
Setaria palmifolia	highlands pitpit	Poaceae	herb	grass		regional crop - New Guinea	New Guinea, Asia		yes							yes						yes						yes
Sicana odorifera	cassabanana	Cucurbitaceae	vine	herbaceous		minor global crop	S. America						green		yes							yes						yes
Silene vulgaris	bladder campion	Caryophyllaceae	herb	forb	yes	minor global	Eurasia	yes	yes								yes	yes	yes	yes		yes	yes					yes	yes
Solanecio biafrae	worowo	Asteraceae	vine	herbaceous		regional crop - Africa	Africa	yes							yes							yes						yes	yes	yes
Solanum aethiopicum	African eggplant	Solanaceae	herb	forb	yes	minor global crop	Africa	some forms					yes		yes							yes	yes					yes
Solanum americanum	black nightshade	Solanaceae	herb	forb	yes	minor global crop	S. America	yes					yes		yes	yes	yes					yes	yes					yes
Solanum ferox	tarong pasai	Solanaceae	herb	forb	yes	minor global crop							yes		yes							yes						yes	yes
Solanum incanum	thorn apple	Solanaceae	woody	shrub	yes	regional crop - Africa, wild toxic	Africa, Asia	yes					yes		yes		yes					yes	yes	yes				yes
Solanum kurzii	Kurz's nightshade	Solanaceae	herb	forb	yes	regional crop - SE Asia	SE Asia						yes		yes	yes	yes	yes				yes						yes
Solanum lycopersicon	tomato	Solanaceae	herb	forb	yes	global crop	Mesoamerica						yes		yes	yes						yes	yes					yes
Solanum macrocarpon	gboma	Solanaceae	woody	shrub	yes	minor global crop	Africa	yes					yes		yes							yes	yes					yes
Solanum melongena	eggplant	Solanaceae	herb	forb	yes	global crop	Asia						yes		yes							yes	yes					yes
Solanum muricatum	pepino	Solanaceae	herb	forb	yes	minor global crop	S. America						yes		yes	yes	yes					yes						yes
Solanum pimpinellifolium	currant tomato	Solanaceae	herb	forb	yes	minor global	Americaws						yes		yes	yes						yes	yes					yes
Solanum scabrum	black nightshade	Solanaceae	herb	forb	yes	minor global crop	Africa	yes					yes		yes	yes	yes					yes	yes					yes
Solanum sisymbriifolium	litchi tomato	Solanaceae	herb	forb	yes	minor global crop	Americas						yes		yes	yes						yes	yes					yes
Solanum stramoniifolium	coconilla	Solanaceae	herb	forb	yes	regional crop - S. America	S. America						yes - tomatolike		yes							yes	yes					yes	yes
Solanum torvum	pea eggplant	Solanaceae	woody	shrub		minor global crop	C. America						yes		yes	yes						yes	yes					yes
Solanum uporo	boro dina	Solanaceae	herb	forb	yes	regional crop - Melanesia, Polynesia	Melanesia, Polynesia						yes		yes							yes						yes
Solanum villosum	red-fruited nightshade	Solanaceae	herb	forb	yes	regional crop	Africa	yes					yes		yes	yes						yes	yes					yes
Solanum violaceum	Indian nightshade	Solanaceae	herb	forb	yes	regional							young		yes	yes						yes						yes
Sonchus arvensis	perennial sow-thistle	Asteraceae	herb	forb	yes	minor global crop	Eurasia	yes									yes	yes	yes			yes	yes					yes	yes
Sonchus palustris	marsh sow-thistle	Asteraceae	herb	forb	yes	regional crop - Europe	Eurasia	yes										yes	yes			yes	yes					yes	yes
Spathiphyllum commutatum	tundah	Araceae	herb	forb		regional crop - SE Asia	SE Asia	yes							yes							yes							yes	yes
Spondias dulcis	dwarf ambarella	Anacardiaceae	woody	tree/shrub		minor global crop	Polynesia	yes					young		yes		yes					yes						yes
Staurogyne elongata	kedji	Acanthaceae	herb	forb		regional crop - Java	SE Asia	yes							yes							yes						yes	yes
Stenochlaena palustris	climbing swamp fern	Blechnaceae	vine	fern		regional crop - New Guinea	New Guinea	yes							yes							yes				yes			yes	yes
Suaeda torreyana	romeritos	Amaranthaceae	herb	forb	yes	regional crop	Mesoamerica	yes	yes						yes		yes	yes					yes	yes				yes
Symphyotrichum undulatum	ch'amch'wi	Asteraceae	herb	forb		regional crop - Korea	Asia	yes										yes	yes			yes						yes	yes
Symphytum officinale	comfrey	Boraginaceae	herb	forb		minor global crop	Eurasia	yes - toxic										yes	yes	yes		yes	yes					yes	yes
Symphytum x uplandicum	Russian comfrey	Boraginaceae	herb	forb		minor global crop	hybrid	yes										yes	yes			yes	yes
Talinum fruticosum	waterleaf	Talinaceae	herb	forb	yes	minor global crop	tropical Americas	yes							yes	yes						yes						yes	yes
Talinum paniculatum	verdolaga francesa	Talinaceae	herb	forb	yes	minor global crop	S. America	yes							yes	yes						yes						yes	yes
Talinum portulacifolium	ebene	Talinaceae	herb	forb	yes	minor global crop	Old World tropics	yes							yes	yes						yes						yes	yes
Taraxacum campylodes	dandelion	Asteraceae	herb	forb	yes	minor global crop	Eurasia	yes										yes	yes	yes	yes	yes	yes					yes	yes
Telfairia occidentalis	fluted gourd	Cucurbitaceae	vine	herbaceous		regional crop	Africa	yes	yes						yes							yes						yes	yes
Telfairia pedata	oyster nut	Cucurbitaceae	vine	herbaceous		regional crop	Africa	yes	yes						yes	yes						yes						yes
Telosma cordata	kanjalate	Apocynaceae	vine	liana		minor global crop	Asia	yes	yes		yes				yes	yes	yes					yes						yes	yes
Tetragonia tetragoniodes	New Zealand spinach	Aizoaceae	herb	succulent	yes	minor global crop	Australia, Asia	yes							yes	yes	yes					yes	yes					yes
Thunbergia grandiflora	kukua-loti	Acanthaceae	vine	liana		regional crop - Himalayas	Asia	yes							yes		yes	yes				yes						yes	yes
Thyrsostachys siamensis	monastary bamboo	Poaceae	woody	bamboo		regional crop - Asia	Asia		yes						yes							yes	yes					yes	yes
Tilia amurensis	pinamu	Tiliaceae	woody	tree		regional crop - Korea	E. Asia	yes	yes									yes	yes			yes						yes	yes
Tilia cordata	littleleaf linden	Tiliaceae	woody	tree		regional crop	Europe	yes	yes									yes	yes	yes		yes						yes	yes
Tilia x europaea	common lime tree	Tiliaceae	woody	tree		regional crop	Europe	yes	yes									yes	yes	yes		yes						yes	yes
Toona sinensis	fragrant spring tree	Meliaceae	woody	tree		minor global crop	E. Asia	yes	yes							yes	yes	yes	yes			yes	yes					yes
Tradescantia spathacea	moses-in-a-boat	Commelinaceae	herb	forb		regional crop - China	C. America	yes	yes			yes			yes		yes					yes						yes	yes	yes
Trichanthera gigantea	nacedero	Acanthaceae	woody	shrub		regional crop	S. America	yes	yes						yes	yes						yes							yes	yes
Trichosanthes dioica	pointed gourd	Cucurbitaceae	vine	herbaceous		regional crop	S. Asia		yes				green		yes	yes	yes	yes				yes						yes
Trichosanthes kirilowii var. japonica	kikarasu-uri	Cucurbitaceae	vine	herbaceous		regional crop	Japan						green				yes	yes	yes			yes						yes
Trichosanthes villosa	hairy snake gourd	Cucurbitaceae	vine	herbaceous		regional crop	SE Asia						green		yes							yes						yes
Trichostigma octandrum	Haitian basket vine	Phytolaccaceae	vine	liana		regional crop	tropical Americas	yes							yes		yes					yes	yes					yes	yes
Trigonopleura malayana	medang keladi	Peraceae	woody	tree		regional crop	SE Asia	yes							yes							yes						yes
Tripolium pannonicum ssp. tripolium	sea aster	Asteraceae	herb	forb		experimental	Europe	yes										yes	yes			yes	yes			yes		yes
Tulbaghia violacea	society garlic	Amaryllidaceae	herb	forb		minor global crop	southern Africa	yes							yes	yes	yes	yes				yes	yes					yes
Tussilago farfara	coltsfoot	Asteraceae	herb	forb		regional crop - China	Eurasia, Africa	yes			yes							yes	yes			yes						yes	yes	yes
Typha angustifolia	narrowleaf cattail	Typhaceae	aquatic	herb		regional crop - N. America	N. America, Eurasia		yes		yes				yes	yes	yes	yes	yes	yes					yes	yes		yes
Typha elephantina	bora	Typhaceae	aquatic	herb		minor global crop	India		yes		yes				yes	yes	yes	yes							yes	yes		yes
Typha latifolia	cattail	Typhaceae	aquatic	herb		minor global crop	global outside of tropics		yes		yes				yes	yes	yes	yes	yes	yes					yes	yes		yes
Typha laxmannii	rogoz laksmana	Typhaceae	aquatic	herb		regional crop - Eurasia	Eurasia		yes		yes				yes		yes	yes	yes						yes	yes		yes
Typhonium trilobatum	panuala	Araceae	herb	forb		regional crop - Sri Lanka	Asia	yes							yes							yes							yes	yes
Ullucus tuberosus	ulluco	Basellaceae	vine	herbaceous	yes	minor global crop	Andes	yes	yes							yes						yes						yes
Urera trinervis	climbing nettle	Urticaceae	vine	liana		regional crop- Africa	Africa	yes	yes						yes		yes					yes	yes					yes	yes
Urtica dioica	stinging nettle	Urticaceae	herb	forb		minor global crop	Eurasia, N. America	yes	yes							yes		yes	yes	yes	yes	yes						yes	yes
Vallaris solanacea	Chama nat	Apocynaceae	vine	liana		minor global	Asia	yes				yes	yes		yes							yes	yes					yes	yes
Vallisneria natans	eelgrass	Hydrocharitaceae	aquatic	herb		minor global crop	Africa, Asia, Australia	yes							yes	yes	yes	yes	yes						yes			yes
Vatovaea pseudolablab	boraya	Fabaceae	vine	liana		regional crop	Africa	yes				yes	yes		yes								yes					yes
Vernonia amygdalina	bitterleaf	Asteraceae	herb	forb		regional crop - Africa	Africa	yes							yes							yes						yes
Vernonia hymenolepis	sweet bitterleaf	Asteraceae	woody	shrub		regional crop - Africa	Africa	yes								yes						yes						yes
Vigna vexatilla	zombi pea	Fabaceae	vine	herbaceous	yes	minor global	Africa	yes					yes	green seeds	yes		yes					yes	yes	yes				yes
Viola arcuata	ru yi cao	Violaceae	herb	forb		regional crop	E. Asia	yes				yes						yes	yes			yes						yes	yes
Viola odorata	sweet violet	Violaceae	herb	forb		minor global crop	Europe	yes				yes						yes				yes						yes	yes
Vitis vinifera	grape	Vitaceae	vine	liana		minor global	Mediterranean	yes								yes	yes	yes	yes	yes		yes	yes					yes
Wolffia arrhiza	water meal	Araceae	aquatic	herb	yes	regional crop - SE Asia	global?	yes							yes	yes	yes	yes	yes	yes					yes			yes
Wolffia globosa	water meal	Araceae	aquatic	herb	yes	regional crop - SE Asia	global?	yes							yes	yes	yes	yes							yes			yes
Xanthosoma belophyllum	chou blanc	Araceae	herb	forb	yes	regional crop - S. America	S. America	yes							yes							yes						yes	yes
Xanthosoma brasiliense	belembe, taioba	Araceae	herb	forb	yes	minor global crop	Americas	yes		yes					yes	yes	yes					yes						yes	yes
Xanthosoma caracu	rolliza	Araceae	herb	forb	yes	regional crop - Americas	Americas	yes							yes							yes						yes	yes
Xanthosoma poeppigii	mafaffa	Araceae	herb	forb	yes	minor global crop	Americas	yes							yes							yes						yes	yes
Xanthosoma sagittifolium	tannia, yautia lila	Araceae	herb	forb	yes	global crop	Americas	yes							yes	yes	yes	yes				yes						yes	yes	yes
Xanthosoma striatipes	canna de brejo	Araceae	herb	forb	yes	regional crop - S. America	tropical S. America					spadix			yes		yes					yes							yes
Xanthosoma yucatanense	macal	Araceae	herb	forb	yes	regional crop - MExico	Mesoamerica	yes							yes							yes						yes	yes
Yucca gigantea	izote	Asparagaceae	woody	woody lily		regional crop - Mesoamerica	Mesoamerica				yes				yes	yes	yes					yes	yes	yes				yes
Yushania anceps	yushania bamboo	Poaceae	woody	bamboo		regional crop	Asia		yes									yes				yes						yes	yes
Yushania maculata	yushania bamboo	Poaceae	woody	bamboo		regional crop	Asia		yes									yes				yes						yes	yes
Zantedeschia aethiopica	white calla lily	Araceae	herb	forb		regional crop - Africa	Africa	yes							yes	yes	yes	yes				yes						yes	yes
Zingiber mioga	mioga ginger	Zingiberaceae	herb	forb		minor global crop	Asia		yes							yes	yes	yes	yes			yes						yes	yes	yes
Zizania latifolia	Manchurian water-rice	Poaceae	aquatic	grass		regional crop - Asia	Asia		yes - infected						yes	yes	yes	yes							yes			yes
